# Supplementary material for: Proteny: discovering and visualizing statistically significant syntenic clusters at the proteome level
Source: PubMed Central journal article supplement (PMC4612220; doi:10.1093/bioinformatics/btv389), 2015-06-23
Supplement: supp_btv389_supp.pdf [file supp_btv389_supp.pdf]

## Proteny: Discovering and visualizing statistically significant syntenic clusters at the proteome level

Thies Gehrman<sup>1</sup>, Marcel J. T. Reinders<sup>1</sup>

<sup>1</sup>Delft Bioinformatics Lab, Delft University of Technology, Mekelweg 4, 2628 CD Delft, The Netherlands

### S-1 DIVERGENCE OF CODON USAGE BETWEEN *S. COMMUNE* AND *A. BISPORUS*

Synteny analysis at the nucleotide sequence level will not always yield interpretable results. For example, codon usage in the amino acid translation depends on the GC content of an organism (Ikemura, 1985): i.e. for GC-rich organisms, the third nucleotide (the wobble position) of a codon is generally a *guanine* or *In* fungi, GC contents are highly variable and it is often the case that codon usage is indeed quite different. For example, figure SF-1 shows the frequencies of codons in two different fungi, *Schizopyllum commune* and *Agaricus bisporus*, showing indeed considerable codon usage differences. Although this results in differences at the nucleotide sequence level, the protein sequences themselves are conserved. When making a mapping between genes, biologists routinely use the amino acid sequences of the associated proteins, because the nucleotide sequence do not result in a hit. Querying the genes from the two genomes against one another using nucleotide BLAST returns only 125 hits, while protein BLAST gives almost 200000 hits. This clearly shows that in situations like these, synteny should be established on the amino acid sequence level.

Figure SF-1 shows that the codon usage between the two Basidiomycetes are substantially different. Aligning these genomes will not work, due to the divergence between the genomes. A BLAST search between nucleotide sequences will rarely return any results. At the amino acid sequence level however, with a BLASTp, the sequence similarity can be recovered.

### S-2 DOT MATRIX VISUALIZATION

Figure SF-2 shows a dot matrix visualization for the alignment for *Schizopyllum commune* and *Agaricus bisporus*. It was generated at [http://genome.jgi.doe.gov/vista\\_embed/?organism=Schco2](http://genome.jgi.doe.gov/vista_embed/?organism=Schco2). It is clear that this visualization is not particularly useful. While there is little to see (because the figure was made from genome alignment), it also is hard to see exactly how the chromosomes relate to each other. Furthermore, it is not particularly helpful when viewing smaller regions simultaneously.

### S-3 DISTANCE CALCULATIONS AND THE CLUSTER SCORE

Figure SF-3a describes the variables which define a hit, which are in turn used to calculate distances between hits (figures SF-3b-c).

The score for a cluster is based upon the score of the hits within the cluster, and the unaccounted exons the cluster encompasses.

### S-4 ANALYTICAL DESCRIPTION OF THE NULL DISTRIBUTION

The cluster score is a summation of three different distributions. Since each part of the cluster score is a summation over random variables, we can invoke the central limit theorem for each component. The *matching* component,  $M$ , which represents the sum of the hits in the cluster, and the components for the unaccounted exons on each organism:  $U_X$ . We estimate a normal distribution for each component:

$$M^C \sim \mathcal{N}(n_C \mu_M, n_C \sigma_M^2) \quad (\text{SE-1})$$

$$U_X^C \sim \mathcal{N}(n_{C,X} \mu_{U,X}, n_{C,X} \sigma_{U,X}^2) \quad (\text{SE-2})$$

where each  $\mu$  and  $\sigma^2$  was estimated from the list of hits, and the list of best hits for each exon. In turn, we can model the cluster null score by summing these distributions:

$$s_{clt}^C = 2M^C - U_\beta^C - U_\gamma^C \quad (\text{SE-3})$$

$$\mu_{clt}^C = 2n_C \mu_M - n_{C,\beta} \mu_{U,\beta} - n_{U,\gamma} \mu_{U,\gamma} \quad (\text{SE-4})$$

$$\sigma_{clt}^{2,C} = 2^2 n_C \sigma_M^2 + n_{U_{C,\beta}} \sigma_{U,\beta}^2 + n_{U_{C,\gamma}} \sigma_{U,\gamma}^2 \quad (\text{SE-5})$$

$$s_{clt}^C \sim \mathcal{N}(\mu_{clt}^C, \sigma_{clt}^{2,C}), \quad (\text{SE-6})$$

which can then be used to calculate a p-value:

$$p_{clt}^C(C) = 1 - P(s_{clt} < s(C)) \quad (\text{SE-7})$$

### S-4.1 Quality of approximation

We compare the CLT approximation to the permutation tests to determine if the CLT p-value is insignificant when the permutation p-value is. To do this, we perform 100,000 permutations for a set of over 6700 clusters (A whole tree), and compare the CLT approximation to the p-value from the permutation. Figure SF-4 plots the permutation values against the CLT approximation values. We observe that they are highly correlated, as expected, with a pearson correlation coefficient of 0.969582. In the logspace plot in figure SF-4b, we see an artifact from the permutations, whereby the resolution of a permuted p-value is limited by the number of permutations. The vertical stripes towards the smaller p-values are where the p-values are no longer discernible from each other. This makes the log-space slightly less correlated, at 0.944636.

The separate band that is seen in figure SF-4a are the leaf nodes (clusters containing only a single hit), and due to our normal approximation, fall along the normal cumulative distribution function curve. As we increase the minimum size of cluster which we approximate with the CLT, we get a better approximation of the permutation test, but as a consequence, we have to perform more permutations. Table ST-1 shows this effect, and figures SF-4c and SF-4d show the individual points for clusters of at least 10 elements in each component. In all our experiments, we only calculated p-values for a cluster if the size of each component was less than 10 (i.e.  $|C| > 10$ ,  $|U_1| > 10$  and  $|U_2| > 10$ ).

## S-5 A DYNAMIC CUTTING ALGORITHM

We prefer a child node over its parent node if it is more significant than its parent and fulfills the conservation ratio, *or*, the parent does not fulfill the conservation ratio *or* if the parent is not significant. We express this in a recursive function, *cut*:

$$cut(n) := \begin{cases} cut(n_L) \cup cut(n_R) & \text{if } \begin{cases} [p(C_R) \geq p(C_n) \wedge \tau_{C_R} > \tau] & \text{or} \\ [p(C_L) \geq p(C_n) \wedge \tau_{C_L} > \tau] & \text{or} \\ [p(C_n) > \alpha \vee \tau_{C_n} > \tau] \end{cases} \\ \emptyset & \text{if } n_C = \emptyset \\ \{C_n\} & \text{if } p(C_n) > \alpha \wedge \tau_{C_n} > \tau \\ \{\} & \text{otherwise} \end{cases} \quad (\text{SE-8})$$

where  $n$  is a node in the dendrogram,  $C_n$  is the cluster described by node  $n$ ,  $n_L$  and  $n_R$  are the child nodes of node  $n$ ,  $p(\cdot)$  is the p-value for a given cluster,  $\alpha$  is a threshold for the p-value,  $\tau_x = \frac{n_x + 1}{n_x + \beta + n_x \gamma + 1}$ , the ratio of conservation for a cluster  $x$ , and  $\tau$  is the conservation ratio threshold.

This is of course a greedy algorithm; There may be child nodes still *more* significant deeper in the tree. The most significant nodes can only be found by an exhaustive search, incurring a costly correction factor. The dynamic cut makes a compromise between the number of tests, and the minimality of the p-values.

## S-6 IMPLEMENTATION DETAILS

Proteny is implemented in Python using the Ibibas (Hulsman *et al.*, 2013) data query and manipulation suite. The BLASTp utility from the blast+ tools suite serves as the local aligner. Finally, the Circos (Krzywinski *et al.*, 2009) utility is used to visualize the discovered clusters. Proteny requires as input a tab-separated file describing gene locations, and the genome in FASTA Format.

## S-7 I-ADHORE CLUSTERS

In order to obtain i-ADHoRe clusters, we performed a BLASTp query between all proteins in each organism, and supplied these to i-ADHoRe. For this, we use the same BLASTp parameters that were used in Proteny. The parameter settings for the *A. niger* strains were based on the suggested parameters from the yeast dataset from the i-ADHoRe publication, and a correspondence with the authors. The settings used are given in table ST-3. In general, we found that the results for the *A. niger* dataset were not very sensitive to the parameters (probably due to high conservation). However, for the basidiomycota, they were more sensitive. Clusters became larger with more gaps, such that the relationships seen in figure SF-10 did not change.

By visualizing the i-ADHoRe clusters in the same way as Proteny, we have another way to easily compare the results from Proteny and i-ADHoRe. We find that i-adhore has many more clusters which are quite large, spanning large areas. This often makes the visualizations hard to interpret. However, many of the large structures we discover are also present in the results of i-ADHoRe. Presented here are the same chromosome-level visualizations presented in the paper, except instead the i-ADHoRe clusters are shown.

Additionally, study the differences between the Proteny and i-ADHoRe visualizations for an apparent scaffolding error in figure SF-7.

## S-8 GUIDING A GENOME ASSEMBLY

We provide here figures which support the ability of Proteny to help identify errors in a genome assembly by comparing two assemblies. Figure SF-7 shows three chromosomes in n402 which can be fused together, but, probably due to an assembly limitation, were not.

## S-9 DEVELOPMENTAL PROTEIN CLUSTERS

We are particularly interested in eight transcription factors which are known to be involved in mushroom formation, and a light sensing protein which has been linked to the initiation of mushroom formation in *S. commune*. To increase the confidence that these transcription factors are functionally similar in both *S. commune* and *A. bisporus*, we wish to find that these genes lie in syntenic regions.

Proteny reveals that six of these nine developmental proteins lie within conserved clusters. For example, figure SF-8c shows the region-level plot for the cluster which contains the transcription factor *gat1*. The figure clearly shows that the transcription factor lies in a well conserved region, i.e. neighboring genes in *A. bisporus* match to neighboring genes in *S. commune*. Despite the order between genes not being conserved, and not all exons being conserved within their homolog, Proteny still can still call a cluster here. Figure SF-8 shows the region-level plots for the clusters of the other developmental proteins found in syntenic clusters. The clusters found for proteins *bril*, *fst4*, and *wc2* are exceedingly large, and rather than show the entire cluster, we show here only a sub-region of the larger cluster which shows only the 30,000bp up- and downstream regions of the developmental protein and its homolog.

For the developmental proteins which are not found in clusters, we plot the blast hits in the 30,000bp up and downstream regions of the gene and its homolog in figure SF-9. In these figures it becomes clear why they were not found in syntenic clusters.

## S-10 CLUSTERS DISCOVERED BY PROTENY AND I-ADHORE

We present here tables describing the discovered clusters. Table ST-4 shows the features of the clusters discovered Proteny for the *Aspergillus niger*, and table ST-5 lists the same for the basidiomycota. To compare, we also calculate the scores for clusters discovered by i-ADHoRe using our scoring metrics, and calculate p-values. The correction factor is defined by the number of clusters in the dataset, i.e. 189 and 377 for the *A. niger* and basidiomycota experiments respectively. These are shown in tables ST-6 and ST-7.

We compare these datasets with some graphs in figure SF-10.

The seemingly identical p-values from Proteny are an artifact of the permutation tests; since we do the number of permutations required by the correction factor, we will often arrive at the same p-value. Some p-values are zero. This comes from a floating point limitation from within the CLT approximation. To overcome this, we use the z-score internally to compare clusters.

### S-10.1 Reconstruction of genome rearrangement between n402 and CBS513.88

To aid the understanding of the rearrangement seen in figure 3, figure SF-11 gives a schematic reconstruction. The clusters are drawn as shown in figure 3, but on a linear plane. Here we see that, while scaffolds 5,6 and 7 from n402 may not have been joined due to an error in the assembly. It becomes clear that scaffold 5 on CBS513.88 must have split in order to facilitate this alignment. In order to discount this rearrangement, we must assume 3 errors in the assembly of n402 and CBS513.88: 1. scaffold 12 in CBS513.88 incorrectly joins sections 12B and 12C, 2. scaffold 5 in n402 incorrectly joins sections 5A and 5B, and 3. scaffold 6 in n402 incorrectly joins sections 6A and 6B. The probability of these three errors at exactly these three locations all being true is undoubtedly low. Based on the syntenic clusters discovered, we trust that this rearrangement is a more reasonable explanation.

## S-11 THE YEAST GENE ORDER BROWSER DATASET

Proteny and i-ADHoRe are run on the same dataset as in (Ghiurcuta and Moret, 2014), on the following genomes:

| Genome                   | Number of genes | Genes with orthology statements in YGOB |
|--------------------------|-----------------|-----------------------------------------|
| <i>C. glabrata</i>       | 5461            | 5450                                    |
| <i>E. gossypii</i>       | 4959            | 4945                                    |
| <i>K. lactis</i>         | 5318            | 5291                                    |
| <i>L. kluyveri</i>       | 5683            | 5663                                    |
| <i>L. thermotolerans</i> | 5425            | 5401                                    |
| <i>L. waltii</i>         | 11,275          | 5522                                    |
| <i>S. cerevisiae</i>     | 7016            | 5987                                    |
| <i>Z. rouxii</i>         | 5338            | 5323                                    |

Most of these organisms do not contain very many exons, and most have single exon genes. This means that Proteny's strategy of using exon sequence similarities is not exploited in this dataset.

### S-11.1 Processing the YGOB dataset

We downloaded the genomes and gene descriptions for the above mentioned genomes from the YGOB, together with the orthology statement (pillars) file. The sequence IDS in the fasta files did not correspond to the sequence IDS in the gene descriptions file, so these were manually corrected. We converted the YGOB formatted gene description file into GFF format and from here they were converted into the specific formats required by Proteny and i-ADHoRe.

Some genomes had two columns in the Pillars file, as ohnolog descriptions. For each other genome, if there was a gene which had two homology statements from the same genome, we counted this as two homologs for this gene.

### S-11.2 Results

Table ST-8 shows the number of clusters found for each pairwise comparison by Proteny and i-ADHoRe, respectively. We find that in 18/28 pairwise comparisons, that Proteny finds fewer clusters, and in total, Proteny finds 3668 clusters, while i-ADHoRe finds 5996 clusters. We find that Proteny and i-ADHoRe find these clusters covering comparable numbers of genes (given in table ST-9). Sometimes Proteny covers more genes, while sometimes i-ADHoRe covers more. For both Proteny and i-ADHoRe, these counts include genes which do not have curated homology statements.

Using the relaxed score from (Ghiurcuta and Moret, 2014), we study the distributions of these scores from Proteny and i-ADHoRe in figure SF-12. We find that the clusters of Proteny have a relaxed score distribution which is higher than that of i-ADHoRe. Figure SF-12a shows that, for each pairwise test, the average relaxed cluster score is generally higher for Proteny than for i-ADHoRe. This is a general trend; We see in figure SF-12b, that when looking at all scores from all tests simultaneously, the distribution of scores is higher in Proteny than in i-ADHoRe. It is not a rule, as seen in figure SF-12c, there are cases for which i-ADHoRe does perform better, and achieves better cluster scores, this can also be seen in figure SF-12a, where some points lie below the red line, indicating that the means of Proteny are lower than the means of i-ADHoRe. However, in these cases, the distributions are usually not statistically significantly different ( $q > 0.5$ ) by a 2 sample Kolmogorov-Smirnov test, with bonferroni multiple testing correction. This indicates that Proteny performs better than i-ADHoRe on this test set.

## S-12 RUNNING TIME

We provide an example of the running time of Proteny. We neglect the time for BLASTp, which is a necessary step for almost all synteny discovery algorithms. A complete run of the example provided together with the implementation, between the yeast genomes *C. glabrata* and *Z. rouxii* takes about 10 minutes. The construction of the distance matrix takes 105 seconds. Building the dendrogram takes 0.7 seconds. Cutting the dendrogram takes 533 seconds. However, Proteny is not optimized beyond some parallelization during permutation calculations, allowing for the possibility of significant speed-up.

## REFERENCES

- Ghiurcuta, C. G. and Moret, B. M. E. (2014). Evaluating synteny for improved comparative studies. *Bioinformatics (Oxford, England)*, **30**(12), i9–18.
- Hulsman, M., Bot, J. J., de Vries, A. P., and Reinders, M. J. T. (2013). Ibidas: Querying Flexible Data Structures to Explore Heterogeneous Bioinformatics Data. *Data Integration in the Life Sciences*, pages 23–37.
- Ikemura, T. (1985). Codon usage and tRNA content in unicellular and multicellular organisms. *Molecular biology and evolution*, **2**(1), 13–34.
- Krzywinski, M., Schein, J., Birol, I., Connors, J., Gascoyne, R., Horsman, D., Jones, S. J., and Marra, M. a. (2009). Circos: an information aesthetic for comparative genomics. *Genome research*, **19**(9), 1639–45.

**FIGURES**

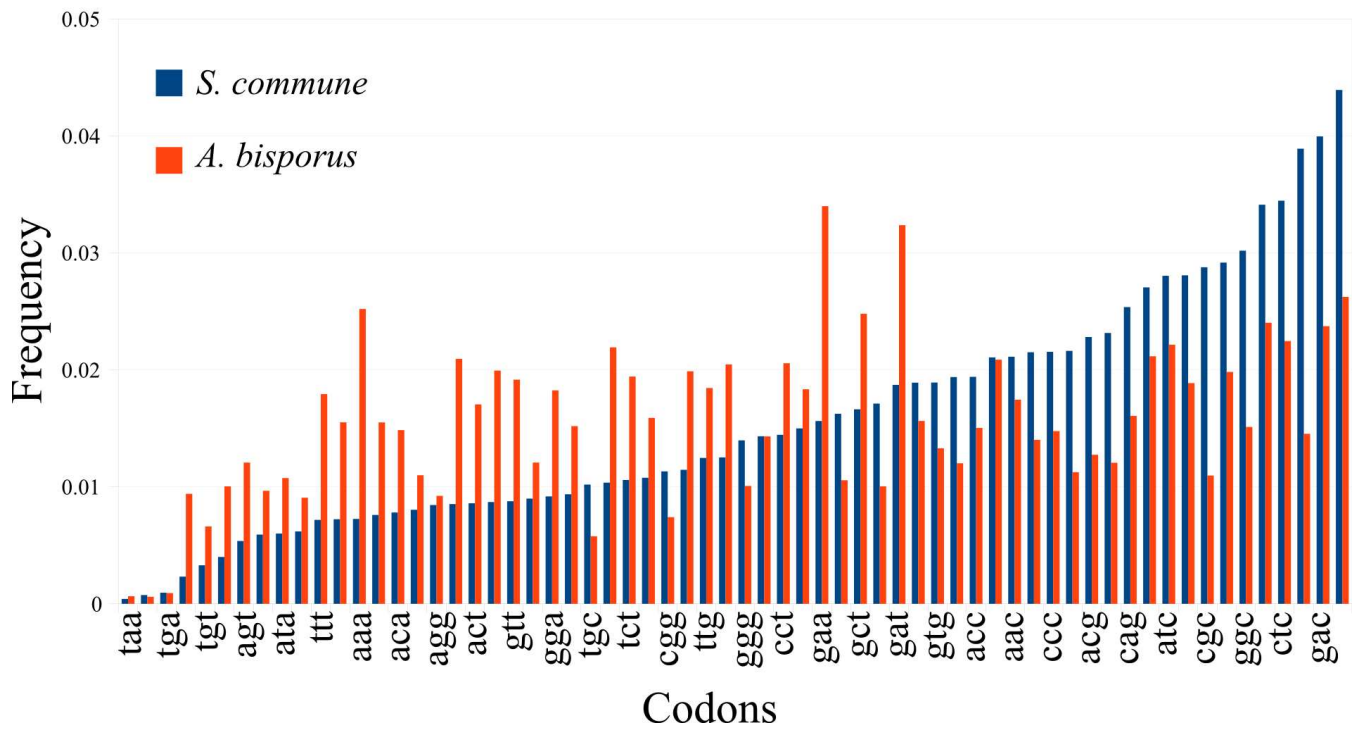

**Fig. SF-1:** Comparing codon usage in *Schizopyllum commune* and *Agaricus bisporus*. The plot relates the frequencies of each codon in *S. commune* and *A. bisporus*. We observe that the codon usage frequencies are largely different. They are not correlated ( $r = 0.454$ ). An analysis on the nucleotide sequence level is not likely to result in interpretable results, due to the differences in codon usages. Their protein sequences are conserved, however, and form the basis for Prototy.

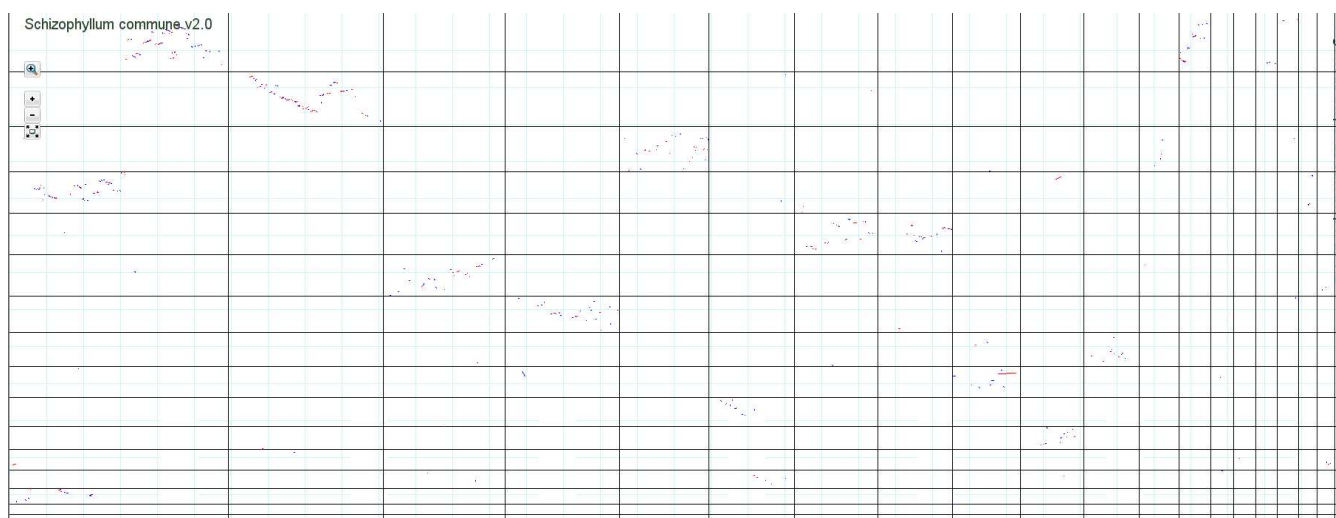

**Fig. SF-2:** The Dot Matrix visualization for *A. bisporus* and *S. commune* is difficult to examine, and provides little information.

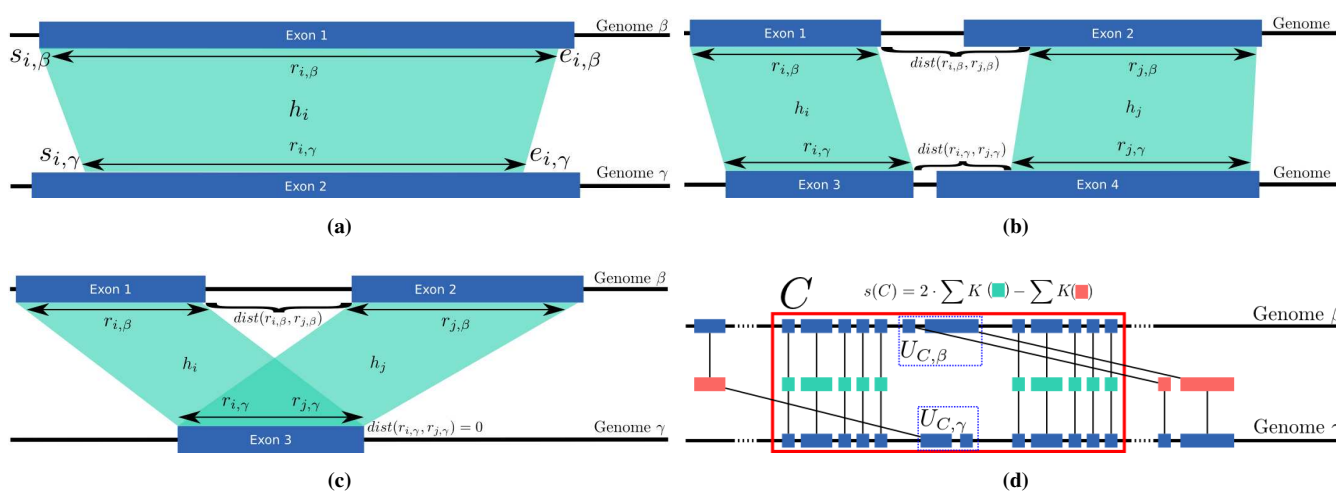

**Fig. SF-3:** (a) A visual representation of the variables involved in the distance calculations. (b) The distances between two hits. In this example, the distance between the two hits would be  $dist(r_{i,\beta}, r_{j,\beta}) + dist(r_{i,\gamma}, r_{j,\gamma})$ . (c) The distance between two hits sharing an exon. In this example, the distance between the two hits would simply be  $dist(r_{i,\beta}, r_{j,\beta})$ . Both hits fall on overlapping regions in genome  $\gamma$ . (d) Illustration of the calculation of the score. Unaccounted exons in  $U_{C,\beta}$  and  $U_{C,\gamma}$  penalize the score of the cluster.

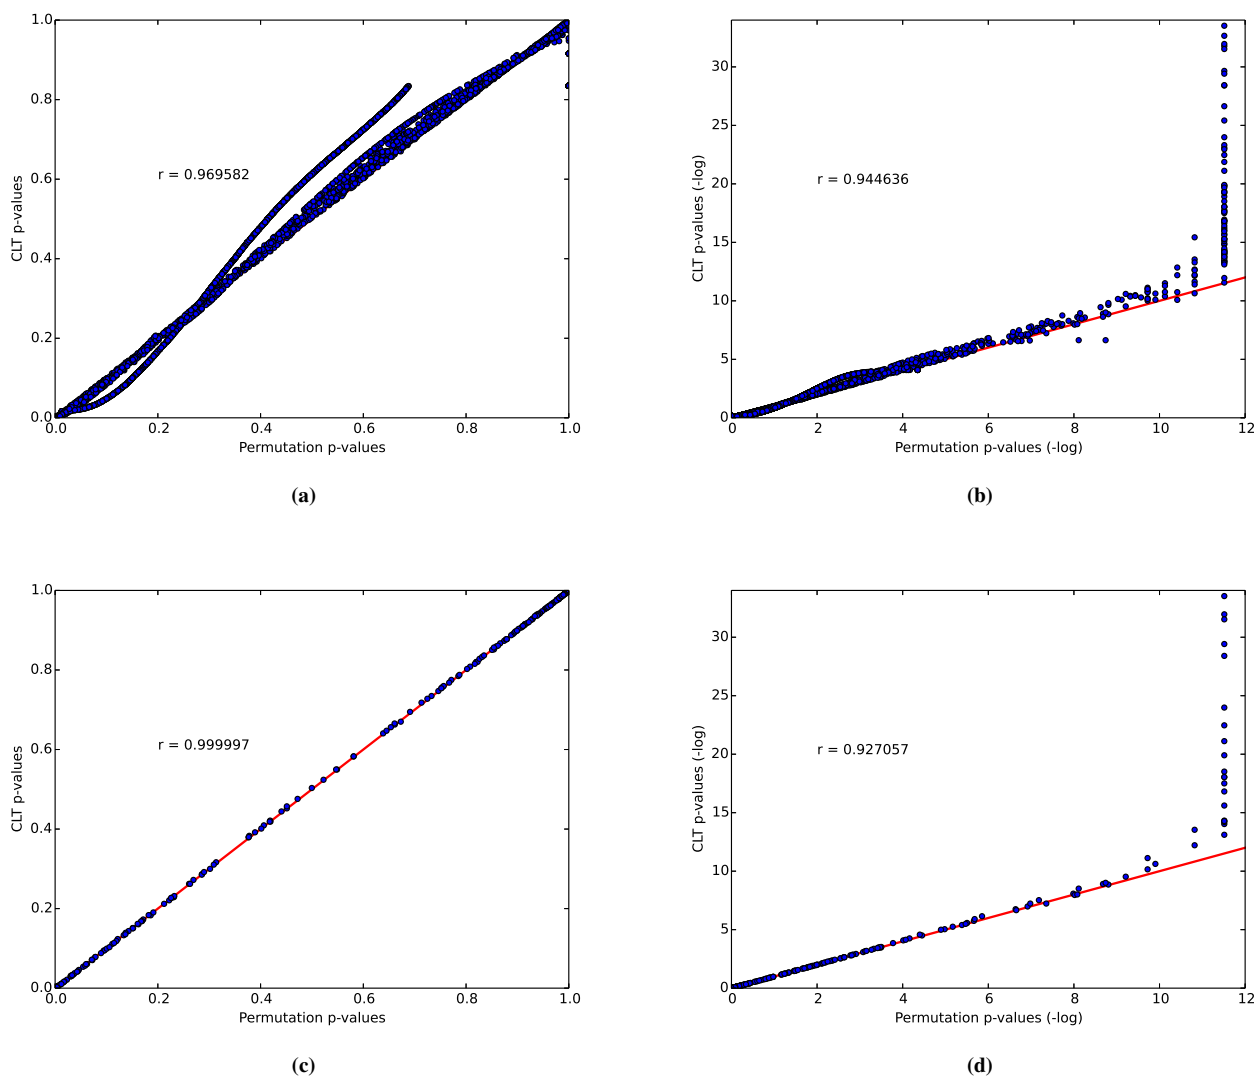

**Fig. SF-4:** (a): Permutation  $p$ -values compared to CLT approximation  $p$ -values, for all clusters. (b): Permutation  $p$ -values compared to CLT approximation  $p$ -values in  $-\log$  space, for all clusters. (c): Permutation  $p$ -values compared to CLT approximation  $p$ -values, only for clusters which have at least 10 hits in each component. (d): Permutation  $p$ -values compared to CLT approximation  $p$ -values in  $-\log$  space, only for clusters which have at least 10 hits in each component.



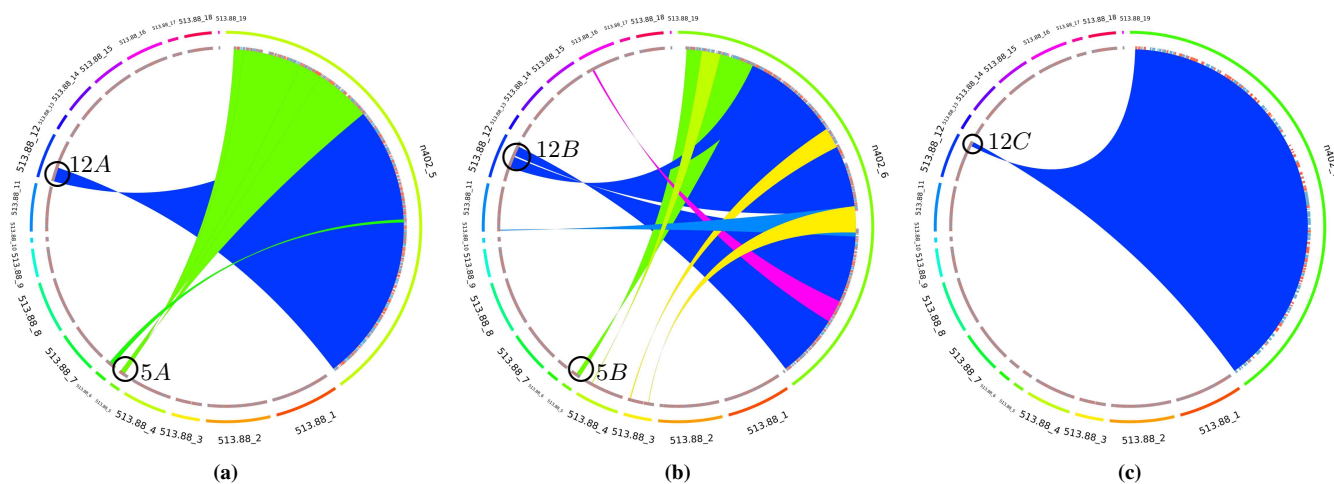

Fig. SF-5: (a) Syntenic clusters found by *i*-ADHoRe for scaffold 5, (b) scaffold 6, and (c) scaffold 7 in *n402*.

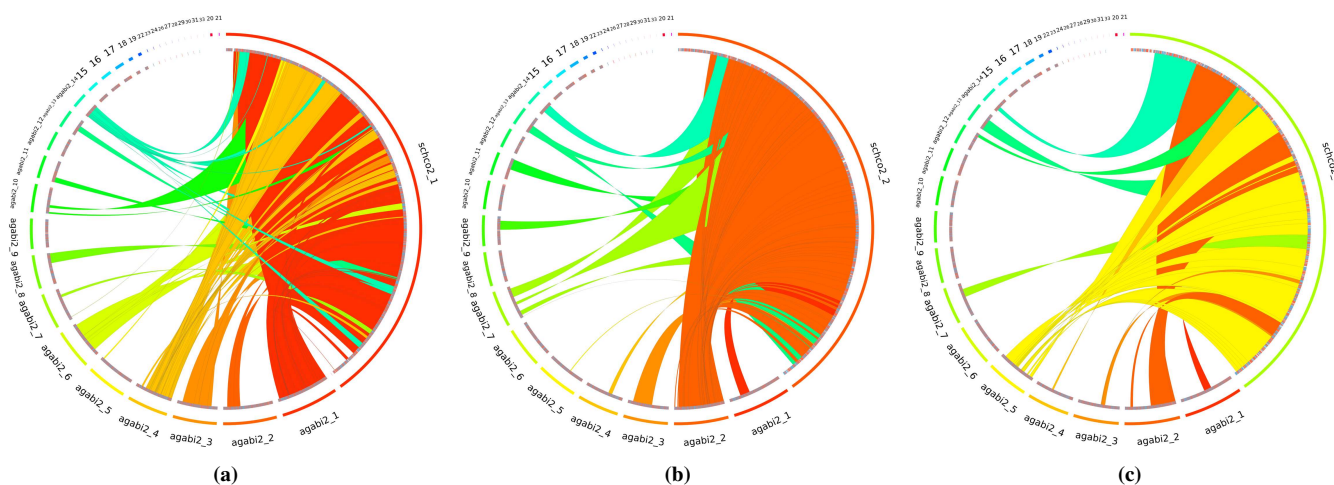

Fig. SF-6: (a) Syntenic clusters found by *i*-ADHoRe for scaffold 1, (b) scaffold 2, and (c) scaffold 8 in *S. commune*.

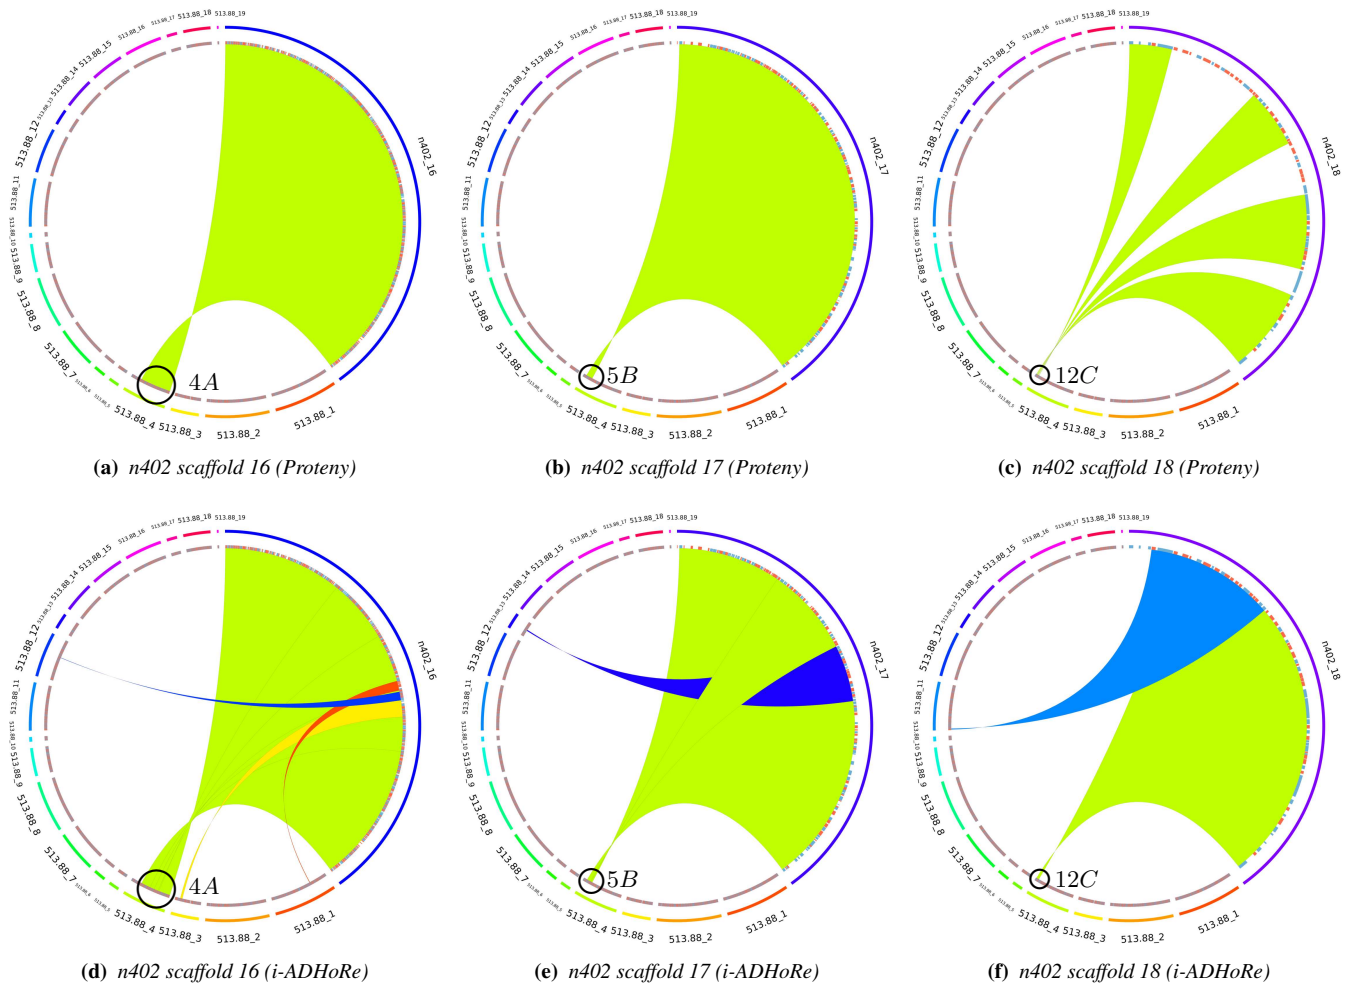

**Fig. SF-7:** (a) Syntenic clusters found for scaffold 16, (b) scaffold 17, and (c) scaffold 18 in n402. From the clusters found, one can surmise that the chromosomes in n402 could be merged. (d) Syntenic clusters found by i-ADHoRe for scaffold 16, (e) scaffold 17, and (f) scaffold 18 in n402.

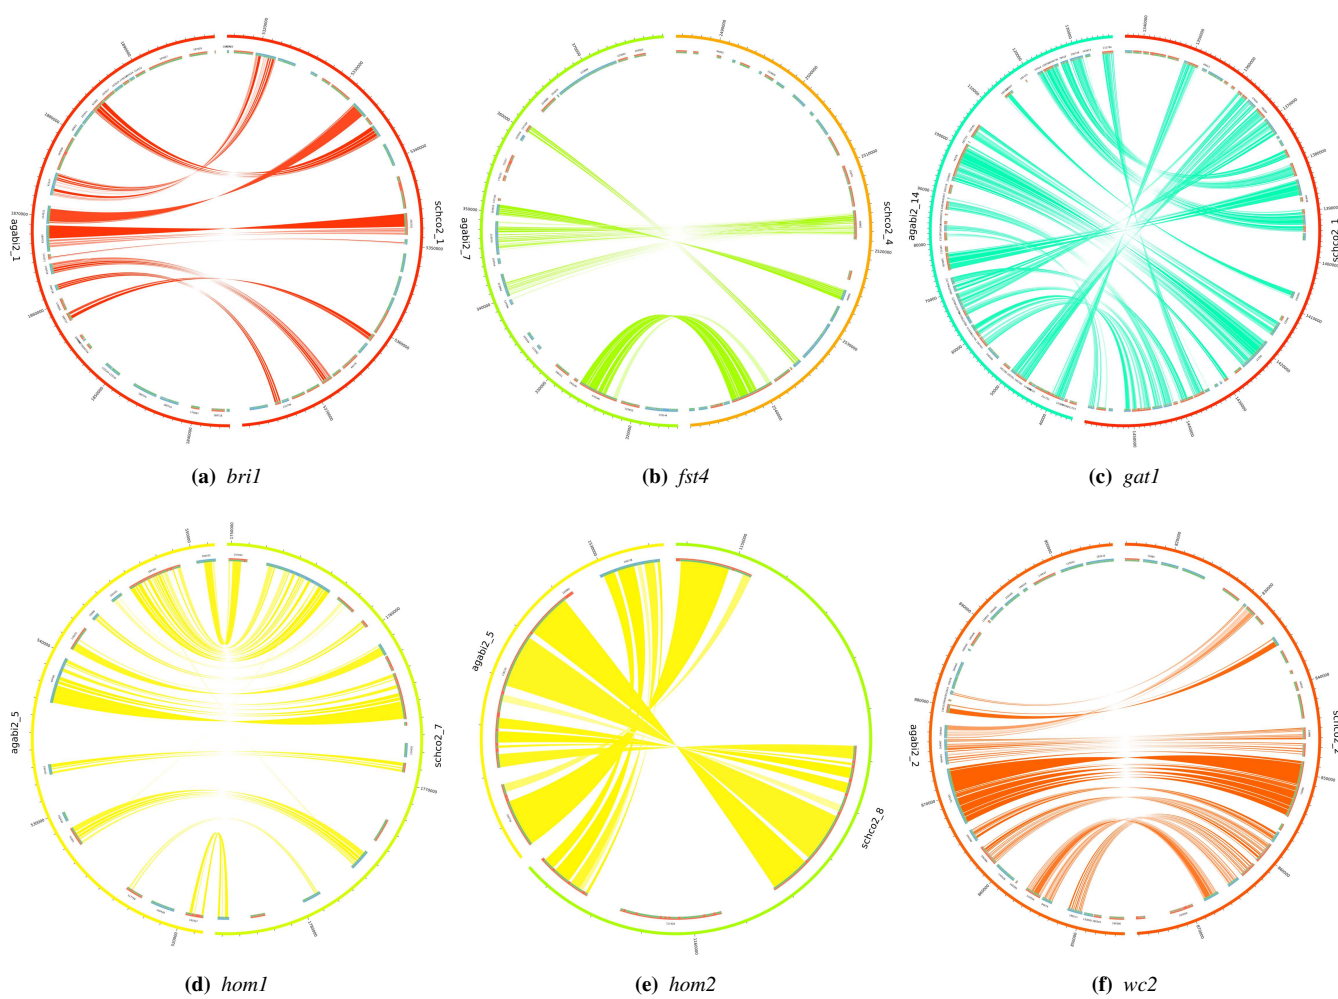

**Fig. SF-8:** The clusters for the six developmental proteins which are found within clusters.

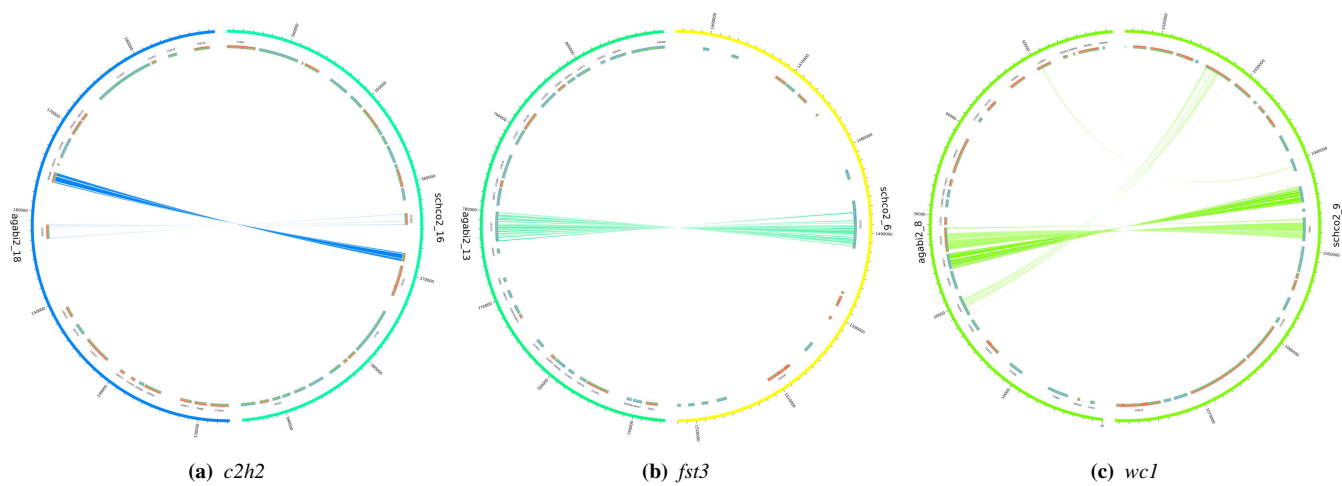

**Fig. SF-9:** The 30,000bb regions surrounding the developmental proteins not found in a cluster.

---

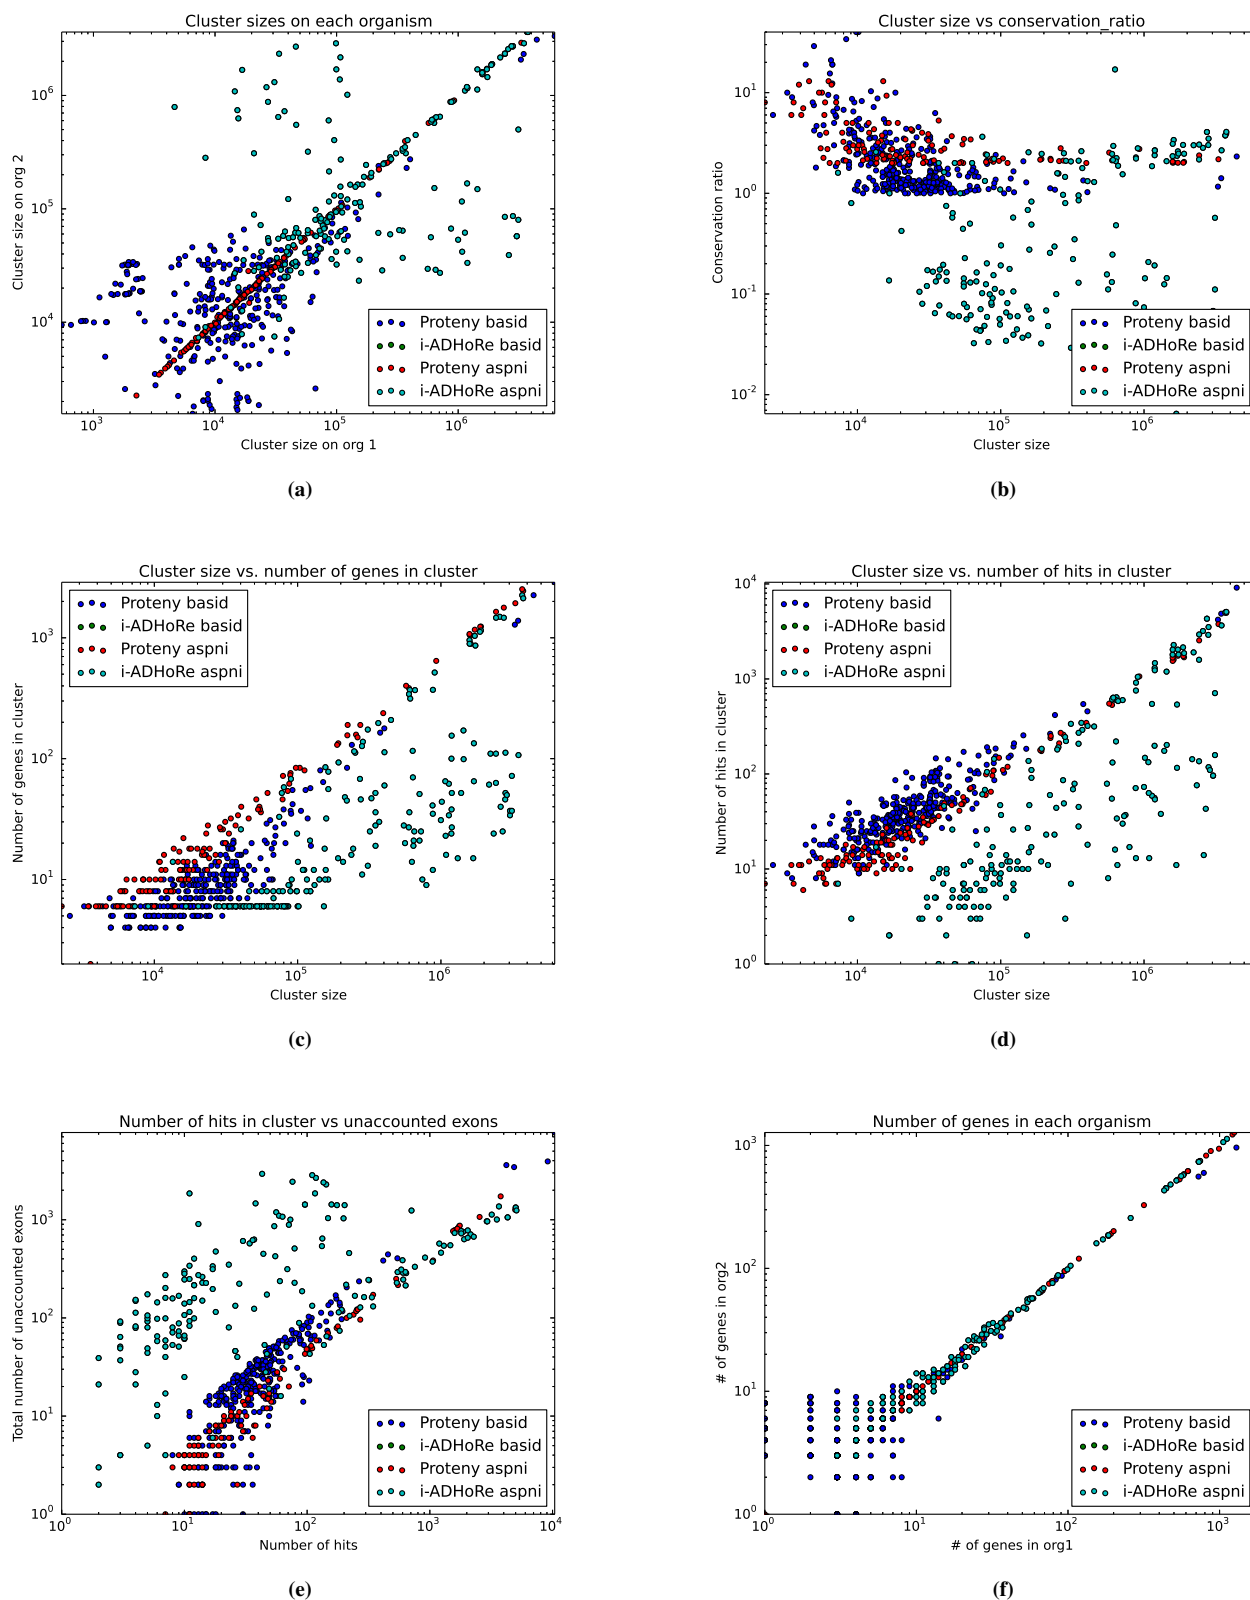

**Fig. SF-10: Features of the datasets:** (a): The cluster sizes on each end of the clusters. (b): The size of each cluster vs. its conservation ratio. (c): The size of each cluster vs. the number of genes in the cluster. (d): The size of each cluster vs. the number of hits in the cluster. (e): The number of hits vs. the number of unaccounted exons in the cluster. (f): The number of genes on each end of the cluster.

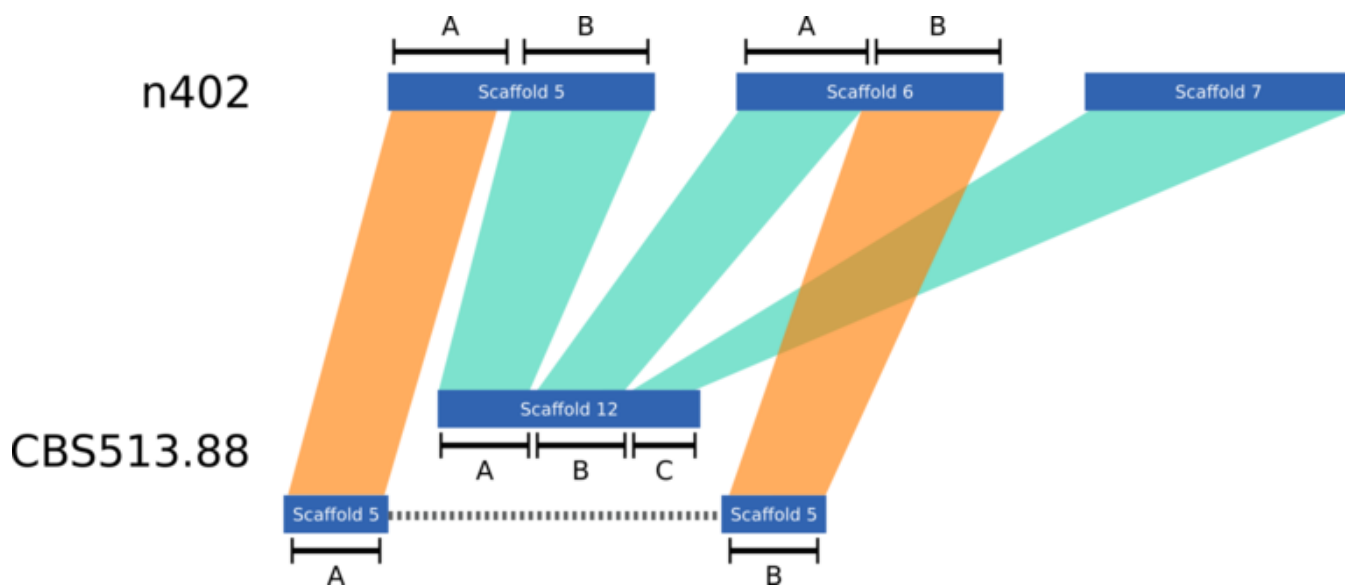

Fig. SF-11: A reconstruction of the possible rearrangement that occurred between n402 and CBS513.88.

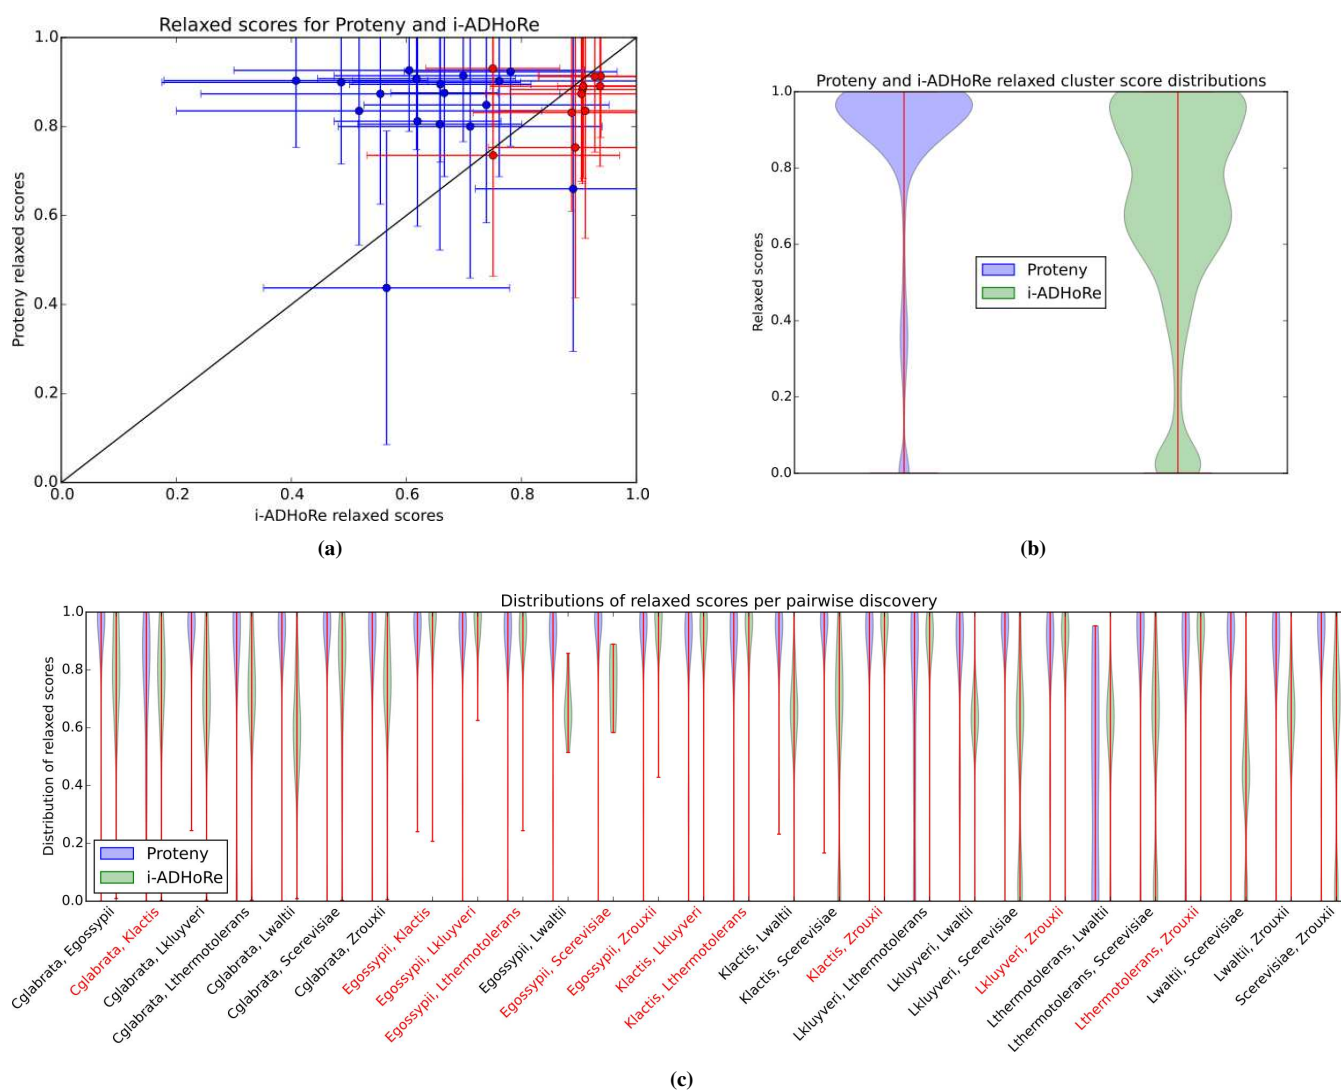

**Fig. SF-12: Relaxed cluster scores:** (a) The means and their standard deviations of relaxed scores for Protены and i-ADHoRe clusters for each pairwise test. Red points are cases where the relaxed score distributions are not significantly different between Protены and i-ADHoRe ( where significance requires  $q < 0.5$  by a Kolmogorov-Smirnov test with bonferroni multiple testing correction ). (b) The distributions of all relaxed scores for Protены and i-ADHoRe. (c) The distributions of relaxed scores for Protены and i-ADHoRe for each pairwise synteny discovery task. Tasks which do not have statistically significantly different score distributions are given a red title.

**TABLES**



| Minimum cluster size | Number of remaining clusters | Correlation         | Correlation in $-\log$ |
|----------------------|------------------------------|---------------------|------------------------|
| 0                    | 6712                         | 0.96958178800427153 | 0.944635871602162      |
| 1                    | 1919                         | 0.99994293156633374 | 0.93910797512522992    |
| 2                    | 1813                         | 0.99997089153420382 | 0.93969939620334619    |
| 3                    | 1482                         | 0.99998372142836534 | 0.94122390044238691    |
| 4                    | 1275                         | 0.99998890070405433 | 0.93883650832503363    |
| 5                    | 1118                         | 0.99999243272163818 | 0.9368089615041757     |
| 6                    | 995                          | 0.99999333088799836 | 0.93285516155764059    |
| 7                    | 900                          | 0.99999465306718771 | 0.93330324737035997    |
| 8                    | 824                          | 0.99999528695141415 | 0.9311538629486954     |
| 9                    | 767                          | 0.99999651760224839 | 0.93350933122001845    |
| 10                   | 719                          | 0.99999671365570508 | 0.92705664196612469    |

**Table ST-1.** Varying the minimum cluster size gives us different qualities of approximations.

|                      | Total genes | # Scaffolds | Discovered genes |                                | Overlap of Proteny and i-ADHoRe |
|----------------------|-------------|-------------|------------------|--------------------------------|---------------------------------|
|                      |             |             | Proteny          | i-ADHoRe                       |                                 |
| <i>A. niger</i>      |             |             | 119 Clusters     | 189 Clusters (93 significant)  | 66.5%                           |
| <i>n402</i>          | 13,612      | 24          | 10,880           | 9667                           | 9310                            |
| <i>CBS513.88</i>     | 14,067      | 19          | 10,959           | 9728                           | 9343                            |
| <i>Basidiomycota</i> |             |             | 345 Clusters     | 377 Clusters (250 significant) | 41.4%                           |
| <i>S. commune</i>    | 14,652      | 36          | 5828             | 2588                           | 2044                            |
| <i>A. bisporus</i>   | 10,438      | 31          | 4572             | 2552                           | 1986                            |

**Table ST-2.** An overview of the datasets and the results of the synteny analysis by Proteny and i-ADHoRe.

| Setting                        | Value <i>A. niger</i> | Value <i>basidiomycota</i> |
|--------------------------------|-----------------------|----------------------------|
| table_type                     | pairs                 | pairs                      |
| cluster_type                   | collinear             | collinear                  |
| gap_size                       | 30                    | 30                         |
| cloud_gap_size                 | 20                    | 20                         |
| cloud_cluster_gap              | 25                    | 25                         |
| cloud_filter_method            | binomial              | binomial                   |
| max_gaps_in_alignment          | 35                    | 35                         |
| cluster_gap                    | 35                    | 35                         |
| tandem_gap                     | 17                    | 17                         |
| q_value                        | 0.75                  | 0.75                       |
| prob_cutoff                    | 0.01                  | 0.01                       |
| anchor_points                  | 3                     | 3                          |
| alignment_method               | nw                    | n2                         |
| level_2_only                   | false                 | false                      |
| multiple_hypothesis_correction | FDR                   | FDR                        |

**Table ST-3.** The options provided to i-ADHoRe.

**Table ST-4:** Clusters discovered by Proteny for the aspergillus genomes

| # | Scaffold |           | Cluster size (bp) |           | # Hits | # Unaccounted exons |           | # Genes found |           | score    | p-value           |
|---|----------|-----------|-------------------|-----------|--------|---------------------|-----------|---------------|-----------|----------|-------------------|
|   | n402     | CBS513.88 | n402              | CBS513.88 |        | n402                | CBS513.88 | n402          | CBS513.88 |          |                   |
| 1 | 1        | 9         | 1575691           | 1585559   | 1546   | 304                 | 463       | 533           | 528       | 2401.253 | 0.0               |
| 2 | 2        | 14        | 1722868           | 1722167   | 1753   | 385                 | 486       | 582           | 585       | 2678.030 | 0.0               |
| 3 | 3        | 13        | 927223            | 904485    | 1063   | 156                 | 229       | 317           | 327       | 1564.374 | 0.0               |
| 4 | 4        | 1         | 3752506           | 3625675   | 4967   | 585                 | 679       | 1216          | 1226      | 6305.060 | 0.0               |
| 5 | 5        | 5         | 15178             | 15161     | 12     | 3                   | 2         | 6             | 6         | 19.601   | 5.11205104692e-07 |

Continued on next page

Table ST-4 – continued from previous page

| #  | Scaffold |           | Cluster size (bp) |           | # Hits | # Unaccounted exons |           | # Genes found |           | score    | p-value           |
|----|----------|-----------|-------------------|-----------|--------|---------------------|-----------|---------------|-----------|----------|-------------------|
|    | n402     | CBS513.88 | n402              | CBS513.88 |        | n402                | CBS513.88 | n402          | CBS513.88 |          |                   |
| 6  | 5        | 5         | 18793             | 28257     | 19     | 2                   | 2         | 7             | 7         | 28.390   | 5.11205104692e-07 |
| 7  | 5        | 5         | 15347             | 15360     | 10     | 2                   | 2         | 5             | 5         | 18.877   | 5.11205104692e-07 |
| 8  | 5        | 5         | 3459              | 3450      | 11     | 0                   | 1         | 3             | 3         | 21.743   | 5.11205104692e-07 |
| 9  | 5        | 5         | 3887              | 3907      | 11     | 0                   | 0         | 3             | 3         | 21.350   | 5.11205104692e-07 |
| 10 | 5        | 5         | 8742              | 8774      | 12     | 0                   | 4         | 4             | 4         | 22.022   | 5.11205104692e-07 |
| 11 | 5        | 5         | 40401             | 40001     | 49     | 6                   | 11        | 20            | 20        | 91.729   | 5.11205104692e-07 |
| 12 | 5        | 5         | 14823             | 14947     | 23     | 3                   | 6         | 8             | 9         | 41.476   | 5.11205104692e-07 |
| 13 | 5        | 5         | 15930             | 15959     | 27     | 0                   | 2         | 11            | 11        | 52.150   | 5.11205104692e-07 |
| 14 | 5        | 5         | 52878             | 52944     | 48     | 7                   | 16        | 19            | 19        | 82.015   | 5.11205104692e-07 |
| 15 | 5        | 12        | 18573             | 18568     | 11     | 1                   | 3         | 6             | 6         | 19.301   | 5.11205104692e-07 |
| 16 | 5        | 12        | 17320             | 17514     | 10     | 0                   | 3         | 6             | 6         | 19.314   | 5.11205104692e-07 |
| 17 | 5        | 12        | 45409             | 45530     | 47     | 7                   | 5         | 16            | 16        | 86.112   | 5.11205104692e-07 |
| 18 | 5        | 12        | 26739             | 26742     | 28     | 4                   | 7         | 8             | 8         | 54.291   | 5.11205104692e-07 |
| 19 | 5        | 12        | 51487             | 51292     | 41     | 5                   | 15        | 23            | 23        | 75.852   | 5.11205104692e-07 |
| 20 | 5        | 12        | 10188             | 9708      | 11     | 1                   | 2         | 5             | 5         | 20.854   | 5.11205104692e-07 |
| 21 | 5        | 12        | 6963              | 7262      | 13     | 3                   | 3         | 5             | 5         | 21.557   | 5.11205104692e-07 |
| 22 | 5        | 12        | 13927             | 13849     | 15     | 0                   | 4         | 3             | 3         | 24.309   | 5.11205104692e-07 |
| 23 | 5        | 12        | 17414             | 17411     | 13     | 2                   | 4         | 5             | 5         | 20.337   | 5.11205104692e-07 |
| 24 | 5        | 12        | 11969             | 11969     | 14     | 0                   | 2         | 6             | 6         | 27.083   | 5.11205104692e-07 |
| 25 | 5        | 12        | 9280              | 9331      | 17     | 2                   | 3         | 4             | 4         | 32.480   | 5.11205104692e-07 |
| 26 | 5        | 12        | 36889             | 36864     | 36     | 1                   | 5         | 14            | 14        | 65.023   | 5.11205104692e-07 |
| 27 | 5        | 12        | 6047              | 6053      | 7      | 1                   | 0         | 3             | 3         | 13.810   | 5.11205104692e-07 |
| 28 | 5        | 12        | 6400              | 6337      | 11     | 2                   | 3         | 5             | 5         | 17.648   | 5.11205104692e-07 |
| 29 | 5        | 12        | 15132             | 15130     | 12     | 0                   | 0         | 6             | 6         | 23.165   | 5.11205104692e-07 |
| 30 | 5        | 12        | 11183             | 11186     | 17     | 4                   | 2         | 6             | 6         | 32.622   | 5.11205104692e-07 |
| 31 | 5        | 12        | 261864            | 255195    | 271    | 31                  | 65        | 75            | 75        | 411.003  | 0.0               |
| 32 | 6        | 5         | 255703            | 252385    | 210    | 43                  | 57        | 79            | 79        | 365.588  | 0.0               |
| 33 | 6        | 12        | 79016             | 75994     | 99     | 25                  | 23        | 36            | 36        | 177.846  | 0.0               |
| 34 | 6        | 12        | 103528            | 100752    | 110    | 12                  | 37        | 42            | 42        | 184.415  | 0.0               |
| 35 | 6        | 12        | 222321            | 221609    | 239    | 53                  | 55        | 78            | 78        | 437.708  | 0.0               |
| 36 | 6        | 12        | 78317             | 78510     | 60     | 7                   | 17        | 23            | 23        | 100.607  | 5.11205104692e-07 |
| 37 | 6        | 12        | 7831              | 7754      | 11     | 1                   | 1         | 4             | 4         | 21.106   | 5.11205104692e-07 |
| 38 | 6        | 12        | 4057              | 4057      | 11     | 0                   | 1         | 3             | 3         | 21.492   | 5.11205104692e-07 |
| 39 | 6        | 12        | 22313             | 21647     | 27     | 3                   | 7         | 8             | 8         | 47.388   | 5.11205104692e-07 |
| 40 | 6        | 12        | 571122            | 571422    | 550    | 68                  | 148       | 200           | 201       | 931.390  | 0.0               |
| 41 | 6        | 12        | 97229             | 96700     | 148    | 26                  | 44        | 42            | 42        | 212.158  | 0.0               |
| 42 | 7        | 12        | 6474              | 6597      | 11     | 0                   | 0         | 3             | 3         | 21.129   | 5.11205104692e-07 |
| 43 | 7        | 12        | 14612             | 14218     | 19     | 3                   | 2         | 7             | 7         | 33.223   | 5.11205104692e-07 |
| 44 | 7        | 12        | 5785              | 5790      | 8      | 2                   | 1         | 4             | 4         | 13.914   | 5.11205104692e-07 |
| 45 | 7        | 12        | 5551              | 5549      | 7      | 1                   | 1         | 4             | 4         | 12.507   | 5.11205104692e-07 |
| 46 | 7        | 12        | 4597              | 4597      | 12     | 0                   | 0         | 3             | 3         | 22.338   | 5.11205104692e-07 |
| 47 | 7        | 12        | 19114             | 14817     | 14     | 1                   | 1         | 7             | 7         | 25.257   | 5.11205104692e-07 |
| 48 | 7        | 12        | 14847             | 14604     | 14     | 2                   | 1         | 5             | 5         | 26.056   | 5.11205104692e-07 |
| 49 | 7        | 12        | 87301             | 87414     | 96     | 16                  | 27        | 31            | 31        | 170.790  | 0.0               |
| 50 | 8        | 15        | 1876560           | 1879506   | 1737   | 357                 | 506       | 617           | 618       | 2862.724 | 0.0               |
| 51 | 9        | 7         | 2424368           | 2339996   | 2547   | 498                 | 570       | 815           | 827       | 3930.327 | 0.0               |
| 52 | 10       | 2         | 3690347           | 3625569   | 5017   | 608                 | 728       | 1250          | 1274      | 6519.327 | 0.0               |
| 53 | 11       | 19        | 89268             | 88478     | 109    | 16                  | 33        | 38            | 38        | 182.224  | 0.0               |
| 54 | 12       | 10        | 7951              | 7980      | 12     | 2                   | 1         | 4             | 4         | 21.277   | 5.11205104692e-07 |
| 55 | 12       | 10        | 31236             | 31234     | 30     | 3                   | 4         | 10            | 10        | 51.020   | 5.11205104692e-07 |
| 56 | 12       | 10        | 12762             | 12620     | 11     | 0                   | 0         | 6             | 6         | 19.516   | 5.11205104692e-07 |
| 57 | 12       | 10        | 17072             | 17039     | 18     | 2                   | 4         | 7             | 7         | 24.827   | 5.11205104692e-07 |
| 58 | 12       | 10        | 13654             | 13554     | 19     | 1                   | 7         | 9             | 9         | 31.983   | 5.11205104692e-07 |
| 59 | 12       | 17        | 598449            | 585393    | 532    | 104                 | 146       | 192           | 191       | 941.678  | 0.0               |
| 60 | 13       | 16        | 23581             | 24128     | 37     | 3                   | 5         | 8             | 7         | 65.771   | 5.11205104692e-07 |

Continued on next page

Table ST-4 – continued from previous page

| #   | Scaffold |           | Cluster size (bp) |           | # Hits | # Unaccounted exons |           | # Genes found |           | score    | p-value           |
|-----|----------|-----------|-------------------|-----------|--------|---------------------|-----------|---------------|-----------|----------|-------------------|
|     | n402     | CBS513.88 | n402              | CBS513.88 |        | n402                | CBS513.88 | n402          | CBS513.88 |          |                   |
| 61  | 13       | 16        | 5267              | 5395      | 9      | 0                   | 0         | 3             | 3         | 17.771   | 5.11205104692e-07 |
| 62  | 13       | 16        | 88784             | 88368     | 108    | 23                  | 29        | 37            | 36        | 185.023  | 0.0               |
| 63  | 13       | 16        | 5674              | 5674      | 12     | 0                   | 0         | 3             | 3         | 23.235   | 5.11205104692e-07 |
| 64  | 13       | 16        | 10795             | 10806     | 14     | 2                   | 2         | 7             | 7         | 26.324   | 5.11205104692e-07 |
| 65  | 13       | 16        | 11680             | 11678     | 10     | 1                   | 3         | 8             | 8         | 19.646   | 5.11205104692e-07 |
| 66  | 13       | 16        | 6172              | 6178      | 10     | 1                   | 2         | 4             | 4         | 17.141   | 5.11205104692e-07 |
| 67  | 13       | 16        | 5877              | 5877      | 11     | 0                   | 1         | 3             | 3         | 21.994   | 5.11205104692e-07 |
| 68  | 13       | 16        | 8368              | 8384      | 14     | 1                   | 1         | 5             | 5         | 26.538   | 5.11205104692e-07 |
| 69  | 13       | 16        | 12068             | 12074     | 11     | 1                   | 1         | 4             | 4         | 18.369   | 5.11205104692e-07 |
| 70  | 13       | 16        | 111629            | 107480    | 119    | 25                  | 34        | 40            | 40        | 198.485  | 0.0               |
| 71  | 13       | 16        | 4357              | 4357      | 5      | 0                   | 0         | 3             | 3         | 10.000   | 5.11205104692e-07 |
| 72  | 13       | 16        | 16113             | 16515     | 20     | 0                   | 8         | 6             | 6         | 36.457   | 5.11205104692e-07 |
| 73  | 13       | 16        | 10441             | 11093     | 10     | 1                   | 2         | 5             | 5         | 17.315   | 5.11205104692e-07 |
| 74  | 13       | 16        | 54102             | 53377     | 48     | 12                  | 3         | 20            | 20        | 88.599   | 5.11205104692e-07 |
| 75  | 13       | 16        | 3084              | 3096      | 11     | 0                   | 0         | 3             | 3         | 21.718   | 5.11205104692e-07 |
| 76  | 13       | 16        | 61448             | 61653     | 71     | 9                   | 11        | 26            | 26        | 120.767  | 5.11205104692e-07 |
| 77  | 13       | 16        | 54706             | 54000     | 57     | 14                  | 14        | 19            | 19        | 100.961  | 0.0               |
| 78  | 13       | 16        | 10924             | 10898     | 16     | 3                   | 4         | 7             | 7         | 29.324   | 5.11205104692e-07 |
| 79  | 13       | 16        | 6230              | 6288      | 12     | 0                   | 0         | 4             | 4         | 23.798   | 5.11205104692e-07 |
| 80  | 13       | 16        | 8352              | 8352      | 13     | 3                   | 1         | 5             | 5         | 24.852   | 5.11205104692e-07 |
| 81  | 13       | 16        | 85337             | 85223     | 65     | 14                  | 16        | 27            | 27        | 115.442  | 0.0               |
| 82  | 13       | 16        | 22217             | 22232     | 21     | 3                   | 6         | 9             | 9         | 33.464   | 5.11205104692e-07 |
| 83  | 13       | 16        | 23651             | 23533     | 39     | 4                   | 4         | 14            | 14        | 65.525   | 5.11205104692e-07 |
| 84  | 13       | 16        | 8896              | 9242      | 14     | 0                   | 2         | 5             | 5         | 23.873   | 5.11205104692e-07 |
| 85  | 13       | 16        | 12956             | 13057     | 12     | 0                   | 2         | 4             | 4         | 20.487   | 5.11205104692e-07 |
| 86  | 13       | 16        | 33984             | 34173     | 33     | 3                   | 12        | 16            | 16        | 55.574   | 5.11205104692e-07 |
| 87  | 13       | 16        | 3586              | 3586      | 7      | 0                   | 0         | 1             | 1         | 14.000   | 5.11205104692e-07 |
| 88  | 13       | 16        | 223416            | 222992    | 251    | 49                  | 68        | 95            | 95        | 458.320  | 0.0               |
| 89  | 13       | 16        | 24335             | 24316     | 20     | 1                   | 5         | 9             | 9         | 33.202   | 5.11205104692e-07 |
| 90  | 13       | 16        | 18050             | 18043     | 21     | 4                   | 6         | 9             | 9         | 32.484   | 5.11205104692e-07 |
| 91  | 13       | 16        | 31230             | 30762     | 29     | 3                   | 5         | 15            | 15        | 51.553   | 5.11205104692e-07 |
| 92  | 13       | 16        | 16851             | 16850     | 13     | 5                   | 0         | 6             | 6         | 22.008   | 5.11205104692e-07 |
| 93  | 14       | 16        | 186744            | 188645    | 178    | 36                  | 46        | 65            | 65        | 310.639  | 0.0               |
| 94  | 14       | 16        | 273789            | 264686    | 261    | 66                  | 56        | 95            | 95        | 444.034  | 0.0               |
| 95  | 14       | 16        | 19945             | 19418     | 24     | 3                   | 7         | 9             | 9         | 36.423   | 5.11205104692e-07 |
| 96  | 14       | 16        | 28683             | 27943     | 35     | 5                   | 12        | 14            | 13        | 57.082   | 5.11205104692e-07 |
| 97  | 15       | 3         | 1582232           | 1609795   | 1598   | 330                 | 456       | 523           | 522       | 2494.486 | 0.0               |
| 98  | 16       | 4         | 1902587           | 1889319   | 1671   | 357                 | 478       | 619           | 616       | 2681.479 | 0.0               |
| 99  | 17       | 4         | 365539            | 395617    | 345    | 56                  | 116       | 118           | 120       | 557.363  | 0.0               |
| 100 | 18       | 4         | 33153             | 33079     | 32     | 3                   | 7         | 12            | 12        | 54.967   | 5.11205104692e-07 |
| 101 | 18       | 4         | 16542             | 16290     | 14     | 0                   | 2         | 5             | 5         | 25.032   | 5.11205104692e-07 |
| 102 | 18       | 4         | 28950             | 29038     | 31     | 6                   | 7         | 13            | 13        | 52.424   | 5.11205104692e-07 |
| 103 | 18       | 4         | 23005             | 23026     | 24     | 4                   | 7         | 12            | 12        | 39.217   | 5.11205104692e-07 |
| 104 | 19       | 11        | 2747323           | 2719178   | 4322   | 463                 | 595       | 875           | 901       | 4999.173 | 0.0               |
| 105 | 20       | 18        | 1582786           | 1540114   | 1681   | 344                 | 467       | 545           | 530       | 2509.615 | 0.0               |
| 106 | 21       | 6         | 192148            | 192246    | 174    | 23                  | 56        | 68            | 66        | 271.886  | 0.0               |
| 107 | 21       | 6         | 53494             | 55387     | 51     | 6                   | 8         | 18            | 18        | 92.804   | 5.11205104692e-07 |
| 108 | 21       | 6         | 8828              | 8615      | 8      | 0                   | 2         | 3             | 3         | 13.927   | 5.11205104692e-07 |
| 109 | 21       | 6         | 23362             | 23357     | 10     | 3                   | 1         | 6             | 6         | 15.599   | 5.11205104692e-07 |
| 110 | 21       | 6         | 30110             | 29987     | 30     | 6                   | 8         | 13            | 13        | 57.424   | 5.11205104692e-07 |
| 111 | 21       | 6         | 38372             | 38319     | 44     | 9                   | 7         | 17            | 17        | 77.317   | 5.11205104692e-07 |
| 112 | 21       | 6         | 17537             | 17428     | 18     | 3                   | 5         | 9             | 9         | 26.740   | 5.11205104692e-07 |
| 113 | 21       | 6         | 4182              | 4184      | 6      | 0                   | 0         | 3             | 3         | 11.997   | 5.11205104692e-07 |
| 114 | 21       | 6         | 15799             | 15962     | 20     | 2                   | 6         | 7             | 7         | 29.799   | 5.11205104692e-07 |
| 115 | 21       | 6         | 5657              | 5657      | 9      | 0                   | 0         | 3             | 3         | 17.794   | 5.11205104692e-07 |

Continued on next page

Table ST-4 – continued from previous page

| #   | Scaffold |           | Cluster size (bp) |           | # Hits | # Unaccounted exons |           | # Genes found |           | score    | p-value           |
|-----|----------|-----------|-------------------|-----------|--------|---------------------|-----------|---------------|-----------|----------|-------------------|
|     | n402     | CBS513.88 | n402              | CBS513.88 |        | n402                | CBS513.88 | n402          | CBS513.88 |          |                   |
| 116 | 21       | 6         | 9967              | 9927      | 10     | 3                   | 0         | 3             | 3         | 17.986   | 5.11205104692e-07 |
| 117 | 21       | 8         | 3305576           | 2918630   | 3818   | 956                 | 776       | 991           | 941       | 4314.013 | 0.0               |
| 118 | 22       | 4         | 21636             | 21225     | 24     | 2                   | 4         | 8             | 9         | 39.342   | 5.11205104692e-07 |
| 119 | 24       | 4         | 12942             | 12943     | 17     | 1                   | 5         | 7             | 7         | 32.321   | 5.11205104692e-07 |

Table ST-5: Clusters discovered by Proteny for the basidiomycota

| #  | Scaffold        |                 | Cluster size (bp) |                 | # Hits | # Unaccounted exons |                 | # Genes found   |                 | score    | p-value           |
|----|-----------------|-----------------|-------------------|-----------------|--------|---------------------|-----------------|-----------------|-----------------|----------|-------------------|
|    | <i>S. comm.</i> | <i>A. bisp.</i> | <i>S. comm.</i>   | <i>A. bisp.</i> |        | <i>S. comm.</i>     | <i>A. bisp.</i> | <i>S. comm.</i> | <i>A. bisp.</i> |          |                   |
| 1  | 1               | 1               | 6222319           | 3338379         | 10420  | 5953                | 1790            | 1787            | 1093            | 4320.545 | 0.0               |
| 2  | 1               | 2               | 2117              | 33953           | 46     | 0                   | 36              | 1               | 6               | 47.840   | 3.7790581231e-07  |
| 3  | 1               | 3               | 2370              | 11980           | 16     | 0                   | 8               | 1               | 3               | 19.660   | 3.7790581231e-07  |
| 4  | 1               | 3               | 1928              | 17733           | 35     | 2                   | 21              | 1               | 5               | 34.659   | 3.7790581231e-07  |
| 5  | 1               | 3               | 1901              | 17733           | 31     | 3                   | 21              | 1               | 5               | 33.300   | 3.7790581231e-07  |
| 6  | 1               | 3               | 1934              | 17887           | 34     | 4                   | 18              | 1               | 5               | 34.482   | 3.7790581231e-07  |
| 7  | 1               | 3               | 7900              | 13821           | 8      | 1                   | 6               | 2               | 4               | 11.599   | 3.7790581231e-07  |
| 8  | 1               | 4               | 9512              | 8423            | 15     | 1                   | 0               | 3               | 3               | 25.434   | 3.7790581231e-07  |
| 9  | 1               | 4               | 20078             | 19627           | 32     | 14                  | 11              | 6               | 6               | 34.268   | 1.20126131264e-13 |
| 10 | 1               | 4               | 11398             | 22514           | 26     | 1                   | 25              | 5               | 5               | 26.357   | 3.7790581231e-07  |
| 11 | 1               | 4               | 150704            | 81172           | 184    | 102                 | 41              | 36              | 28              | 217.613  | 0.0               |
| 12 | 1               | 4               | 29757             | 11495           | 37     | 27                  | 0               | 6               | 5               | 43.452   | 3.7790581231e-07  |
| 13 | 1               | 4               | 7146              | 9076            | 15     | 1                   | 2               | 4               | 4               | 22.918   | 3.7790581231e-07  |
| 14 | 1               | 4               | 12649             | 11340           | 15     | 4                   | 3               | 4               | 4               | 24.560   | 3.7790581231e-07  |
| 15 | 1               | 4               | 33887             | 15060           | 35     | 22                  | 5               | 6               | 5               | 43.446   | 3.7790581231e-07  |
| 16 | 1               | 4               | 19618             | 10899           | 35     | 15                  | 2               | 4               | 4               | 43.241   | 3.7790581231e-07  |
| 17 | 1               | 4               | 39465             | 28409           | 59     | 26                  | 18              | 8               | 8               | 61.758   | 0.0               |
| 18 | 1               | 4               | 376649            | 229410          | 544    | 338                 | 67              | 83              | 81              | 589.204  | 0.0               |
| 19 | 1               | 4               | 8243              | 31935           | 47     | 7                   | 28              | 3               | 8               | 40.862   | 3.7790581231e-07  |
| 20 | 1               | 4               | 11444             | 17106           | 26     | 1                   | 13              | 6               | 5               | 31.493   | 3.7790581231e-07  |
| 21 | 1               | 4               | 10676             | 7000            | 28     | 8                   | 0               | 3               | 2               | 37.867   | 3.7790581231e-07  |
| 22 | 1               | 4               | 10182             | 8984            | 21     | 12                  | 4               | 3               | 3               | 21.561   | 3.7790581231e-07  |
| 23 | 1               | 4               | 16598             | 16265           | 27     | 16                  | 10              | 6               | 6               | 38.166   | 3.7790581231e-07  |
| 24 | 1               | 4               | 32629             | 19331           | 63     | 24                  | 7               | 10              | 9               | 81.018   | 3.7790581231e-07  |
| 25 | 1               | 4               | 26468             | 31649           | 51     | 13                  | 28              | 10              | 10              | 66.877   | 0.0               |
| 26 | 1               | 4               | 32318             | 16567           | 49     | 44                  | 5               | 8               | 7               | 45.722   | 3.7790581231e-07  |
| 27 | 1               | 4               | 40391             | 29032           | 43     | 19                  | 18              | 8               | 8               | 46.287   | 0.0               |
| 28 | 1               | 4               | 60739             | 38747           | 69     | 42                  | 16              | 16              | 13              | 71.414   | 0.0               |
| 29 | 1               | 4               | 64342             | 34292           | 73     | 31                  | 9               | 16              | 15              | 100.718  | 3.7790581231e-07  |
| 30 | 1               | 4               | 5469              | 3898            | 18     | 4                   | 0               | 3               | 3               | 26.241   | 3.7790581231e-07  |
| 31 | 1               | 4               | 402519            | 273650          | 457    | 303                 | 141             | 91              | 87              | 503.117  | 0.0               |
| 32 | 1               | 4               | 92077             | 84613           | 185    | 57                  | 78              | 27              | 28              | 183.890  | 0.0               |
| 33 | 1               | 4               | 14722             | 8827            | 54     | 19                  | 0               | 4               | 4               | 52.870   | 3.7790581231e-07  |
| 34 | 1               | 4               | 19417             | 18936           | 39     | 7                   | 11              | 6               | 6               | 52.723   | 3.7790581231e-07  |
| 35 | 1               | 4               | 5132              | 3627            | 8      | 3                   | 1               | 3               | 2               | 13.809   | 3.7790581231e-07  |
| 36 | 1               | 4               | 8347              | 8158            | 33     | 0                   | 0               | 5               | 5               | 53.989   | 3.7790581231e-07  |
| 37 | 1               | 4               | 16443             | 9123            | 26     | 12                  | 4               | 5               | 5               | 29.713   | 3.7790581231e-07  |
| 38 | 1               | 4               | 143844            | 92884           | 257    | 102                 | 20              | 41              | 39              | 317.120  | 0.0               |
| 39 | 1               | 5               | 20733             | 38357           | 77     | 24                  | 45              | 4               | 8               | 47.362   | 6.21114271127e-12 |
| 40 | 1               | 5               | 5683              | 38357           | 46     | 1                   | 44              | 4               | 8               | 31.042   | 3.7790581231e-07  |
| 41 | 1               | 7               | 14056             | 51298           | 126    | 13                  | 70              | 2               | 6               | 116.358  | 0.0               |
| 42 | 1               | 9               | 14032             | 7514            | 27     | 10                  | 0               | 3               | 2               | 35.710   | 3.7790581231e-07  |
| 43 | 1               | 12              | 1961              | 31984           | 54     | 2                   | 25              | 1               | 8               | 51.498   | 3.7790581231e-07  |
| 44 | 1               | 12              | 1919              | 31785           | 44     | 2                   | 32              | 1               | 8               | 36.800   | 3.7790581231e-07  |

Continued on next page

Table ST-5 – continued from previous page

| #  | Scaffold        |                 | Cluster size (bp) |                 | # Hits | # Unaccounted exons |                 | # Genes found   |                 | score    | p-value           |
|----|-----------------|-----------------|-------------------|-----------------|--------|---------------------|-----------------|-----------------|-----------------|----------|-------------------|
|    | <i>S. comm.</i> | <i>A. bisp.</i> | <i>S. comm.</i>   | <i>A. bisp.</i> |        | <i>S. comm.</i>     | <i>A. bisp.</i> | <i>S. comm.</i> | <i>A. bisp.</i> |          |                   |
| 45 | 1               | 12              | 1925              | 32017           | 50     | 1                   | 23              | 1               | 8               | 58.863   | 3.7790581231e-07  |
| 46 | 1               | 14              | 30067             | 26158           | 44     | 13                  | 21              | 10              | 10              | 47.728   | 0.0               |
| 47 | 1               | 14              | 90154             | 61800           | 86     | 56                  | 12              | 18              | 17              | 104.152  | 0.0               |
| 48 | 1               | 14              | 122733            | 102750          | 194    | 65                  | 52              | 28              | 29              | 248.352  | 0.0               |
| 49 | 1               | 14              | 109031            | 113538          | 149    | 84                  | 51              | 28              | 27              | 159.346  | 0.0               |
| 50 | 1               | 14              | 13269             | 11235           | 34     | 7                   | 10              | 5               | 5               | 39.771   | 3.7790581231e-07  |
| 51 | 1               | 14              | 24907             | 31508           | 38     | 20                  | 12              | 8               | 8               | 48.624   | 0.0               |
| 52 | 1               | 14              | 18316             | 6455            | 14     | 8                   | 1               | 3               | 3               | 18.143   | 3.7790581231e-07  |
| 53 | 1               | 14              | 8298              | 16712           | 25     | 0                   | 16              | 4               | 4               | 23.682   | 3.7790581231e-07  |
| 54 | 1               | 14              | 69951             | 41013           | 101    | 52                  | 17              | 13              | 14              | 113.885  | 0.0               |
| 55 | 1               | 14              | 21088             | 20797           | 41     | 4                   | 7               | 4               | 4               | 61.196   | 3.7790581231e-07  |
| 56 | 1               | 15              | 1961              | 32669           | 49     | 1                   | 30              | 1               | 5               | 40.327   | 3.7790581231e-07  |
| 57 | 1               | 15              | 1922              | 32672           | 38     | 1                   | 36              | 1               | 5               | 25.371   | 3.7790581231e-07  |
| 58 | 1               | 17              | 9398              | 24076           | 91     | 7                   | 14              | 2               | 4               | 115.946  | 3.7790581231e-07  |
| 59 | 1               | 18              | 11410             | 16563           | 36     | 16                  | 13              | 2               | 5               | 28.804   | 9.00947083604e-09 |
| 60 | 1               | 18              | 1121              | 16557           | 18     | 0                   | 13              | 1               | 5               | 19.010   | 3.7790581231e-07  |
| 61 | 2               | 2               | 4432838           | 3106887         | 9152   | 2784                | 1148            | 1291            | 961             | 7737.229 | 0.0               |
| 62 | 2               | 3               | 6685              | 4582            | 18     | 0                   | 0               | 3               | 1               | 31.516   | 3.7790581231e-07  |
| 63 | 2               | 3               | 22011             | 17282           | 72     | 32                  | 23              | 3               | 5               | 59.111   | 1.22124532709e-15 |
| 64 | 2               | 5               | 5171              | 6866            | 11     | 1                   | 2               | 2               | 3               | 17.750   | 3.7790581231e-07  |
| 65 | 2               | 5               | 16060             | 2151            | 35     | 14                  | 1               | 4               | 1               | 50.315   | 3.7790581231e-07  |
| 66 | 2               | 7               | 15985             | 18379           | 86     | 23                  | 42              | 4               | 5               | 58.445   | 1.84086079713e-12 |
| 67 | 2               | 10              | 6679              | 4866            | 36     | 0                   | 2               | 3               | 2               | 59.112   | 3.7790581231e-07  |
| 68 | 2               | 12              | 31882             | 35240           | 108    | 33                  | 32              | 7               | 11              | 95.420   | 0.0               |
| 69 | 2               | 12              | 1513              | 21872           | 27     | 0                   | 22              | 1               | 5               | 29.930   | 3.7790581231e-07  |
| 70 | 2               | 13              | 6880              | 1476            | 17     | 6                   | 0               | 3               | 1               | 22.019   | 3.7790581231e-07  |
| 71 | 2               | 15              | 22442             | 32202           | 84     | 29                  | 40              | 3               | 5               | 45.267   | 1.7966662158e-08  |
| 72 | 2               | 16              | 15291             | 1683            | 48     | 8                   | 0               | 4               | 1               | 56.298   | 3.7790581231e-07  |
| 73 | 2               | 16              | 61060             | 15052           | 109    | 87                  | 13              | 8               | 4               | 73.670   | 0.0               |
| 74 | 2               | 17              | 2241              | 23887           | 32     | 3                   | 25              | 1               | 4               | 32.715   | 3.7790581231e-07  |
| 75 | 2               | 18              | 6679              | 1808            | 18     | 0                   | 0               | 3               | 1               | 31.646   | 3.7790581231e-07  |
| 76 | 3               | 1               | 548               | 9474            | 15     | 0                   | 3               | 1               | 3               | 23.469   | 3.7790581231e-07  |
| 77 | 3               | 6               | 3456993           | 2321670         | 4864   | 2303                | 1137            | 787             | 598             | 3456.263 | 0.0               |
| 78 | 3               | 7               | 2423              | 18777           | 50     | 2                   | 21              | 1               | 5               | 58.532   | 3.7790581231e-07  |
| 79 | 4               | 1               | 12192             | 6770            | 24     | 6                   | 4               | 5               | 2               | 32.017   | 3.7790581231e-07  |
| 80 | 4               | 2               | 12720             | 21709           | 40     | 20                  | 13              | 3               | 4               | 32.407   | 5.89594040257e-10 |
| 81 | 4               | 3               | 1402              | 17736           | 35     | 1                   | 21              | 1               | 5               | 30.352   | 3.7790581231e-07  |
| 82 | 4               | 3               | 1865              | 17736           | 38     | 1                   | 17              | 1               | 5               | 42.580   | 3.7790581231e-07  |
| 83 | 4               | 4               | 1879              | 27886           | 57     | 0                   | 20              | 1               | 8               | 52.280   | 3.7790581231e-07  |
| 84 | 4               | 6               | 1249              | 4968            | 14     | 0                   | 1               | 1               | 3               | 21.564   | 3.7790581231e-07  |
| 85 | 4               | 7               | 3279967           | 2069434         | 4204   | 2351                | 1255            | 726             | 558             | 2555.619 | 0.0               |
| 86 | 4               | 8               | 22926             | 19389           | 54     | 21                  | 17              | 4               | 2               | 58.039   | 0.0               |
| 87 | 4               | 8               | 22935             | 1858            | 28     | 21                  | 0               | 4               | 1               | 34.103   | 3.7790581231e-07  |
| 88 | 4               | 10              | 2640              | 10182           | 39     | 0                   | 0               | 1               | 3               | 48.581   | 3.7790581231e-07  |
| 89 | 4               | 12              | 20269             | 32047           | 54     | 25                  | 24              | 2               | 9               | 41.403   | 4.48530101949e-13 |
| 90 | 4               | 12              | 11879             | 32168           | 58     | 23                  | 21              | 2               | 9               | 55.611   | 0.0               |
| 91 | 4               | 15              | 2284              | 32645           | 40     | 1                   | 36              | 1               | 5               | 32.229   | 3.7790581231e-07  |
| 92 | 4               | 18              | 33922             | 16563           | 83     | 24                  | 7               | 5               | 5               | 71.539   | 3.7790581231e-07  |
| 93 | 4               | 19              | 17507             | 9396            | 25     | 13                  | 4               | 5               | 4               | 28.071   | 3.7790581231e-07  |
| 94 | 5               | 1               | 4974              | 2238            | 28     | 0                   | 0               | 3               | 1               | 36.880   | 3.7790581231e-07  |
| 95 | 5               | 3               | 13285             | 23912           | 44     | 5                   | 12              | 3               | 7               | 63.458   | 3.7790581231e-07  |
| 96 | 5               | 3               | 4257              | 4355            | 18     | 0                   | 0               | 3               | 3               | 31.484   | 3.7790581231e-07  |
| 97 | 5               | 3               | 3817              | 6872            | 19     | 0                   | 3               | 2               | 3               | 31.789   | 3.7790581231e-07  |
| 98 | 5               | 3               | 9906              | 7670            | 26     | 3                   | 1               | 4               | 4               | 36.221   | 3.7790581231e-07  |
| 99 | 5               | 3               | 14223             | 24488           | 44     | 8                   | 25              | 5               | 6               | 48.382   | 3.7790581231e-07  |

Continued on next page

Table ST-5 – continued from previous page

| #   | Scaffold        |                 | Cluster size (bp) |                 | # Hits | # Unaccounted exons |                 | # Genes found   |                 | score   | p-value           |
|-----|-----------------|-----------------|-------------------|-----------------|--------|---------------------|-----------------|-----------------|-----------------|---------|-------------------|
|     | <i>S. comm.</i> | <i>A. bisp.</i> | <i>S. comm.</i>   | <i>A. bisp.</i> |        | <i>S. comm.</i>     | <i>A. bisp.</i> | <i>S. comm.</i> | <i>A. bisp.</i> |         |                   |
| 100 | 5               | 3               | 11556             | 8205            | 22     | 12                  | 0               | 5               | 4               | 26.552  | 3.7790581231e-07  |
| 101 | 5               | 3               | 1582              | 17730           | 30     | 2                   | 21              | 1               | 5               | 29.546  | 3.7790581231e-07  |
| 102 | 5               | 3               | 21485             | 13223           | 16     | 11                  | 5               | 3               | 3               | 20.989  | 3.7790581231e-07  |
| 103 | 5               | 3               | 25862             | 19259           | 53     | 12                  | 2               | 6               | 5               | 72.732  | 3.7790581231e-07  |
| 104 | 5               | 3               | 7683              | 9022            | 12     | 0                   | 4               | 2               | 3               | 17.495  | 3.7790581231e-07  |
| 105 | 5               | 3               | 26663             | 12083           | 49     | 10                  | 0               | 7               | 7               | 67.561  | 3.7790581231e-07  |
| 106 | 5               | 3               | 7500              | 17733           | 39     | 17                  | 16              | 2               | 5               | 35.600  | 9.69224700498e-13 |
| 107 | 5               | 3               | 9486              | 12979           | 35     | 0                   | 4               | 5               | 5               | 47.572  | 3.7790581231e-07  |
| 108 | 5               | 3               | 8365              | 12836           | 27     | 2                   | 7               | 4               | 4               | 38.153  | 3.7790581231e-07  |
| 109 | 5               | 3               | 13475             | 57953           | 53     | 4                   | 47              | 4               | 5               | 47.869  | 3.7790581231e-07  |
| 110 | 5               | 3               | 65992             | 58329           | 63     | 35                  | 24              | 8               | 10              | 54.893  | 0.0               |
| 111 | 5               | 3               | 4777              | 4032            | 17     | 0                   | 1               | 3               | 2               | 25.579  | 3.7790581231e-07  |
| 112 | 5               | 3               | 13320             | 11814           | 15     | 12                  | 2               | 4               | 4               | 19.491  | 3.7790581231e-07  |
| 113 | 5               | 3               | 12030             | 12308           | 19     | 5                   | 2               | 3               | 4               | 30.636  | 3.7790581231e-07  |
| 114 | 5               | 3               | 7368              | 13495           | 29     | 1                   | 8               | 4               | 5               | 35.348  | 3.7790581231e-07  |
| 115 | 5               | 4               | 6423              | 4576            | 30     | 0                   | 1               | 3               | 2               | 44.033  | 3.7790581231e-07  |
| 116 | 5               | 7               | 2505              | 18720           | 57     | 2                   | 14              | 1               | 5               | 70.552  | 3.7790581231e-07  |
| 117 | 5               | 7               | 2426              | 18747           | 44     | 3                   | 27              | 1               | 5               | 60.313  | 3.7790581231e-07  |
| 118 | 5               | 7               | 2474              | 18723           | 45     | 2                   | 26              | 1               | 5               | 62.765  | 3.7790581231e-07  |
| 119 | 5               | 12              | 7370              | 35065           | 50     | 16                  | 30              | 2               | 9               | 29.548  | 4.18003388569e-08 |
| 120 | 5               | 12              | 1009              | 9962            | 16     | 0                   | 13              | 1               | 4               | 19.836  | 3.7790581231e-07  |
| 121 | 5               | 12              | 1725              | 31644           | 44     | 2                   | 28              | 1               | 8               | 41.803  | 3.7790581231e-07  |
| 122 | 5               | 17              | 2539              | 24507           | 49     | 0                   | 15              | 1               | 4               | 52.166  | 3.7790581231e-07  |
| 123 | 6               | 2               | 6172              | 21563           | 18     | 2                   | 13              | 3               | 2               | 19.336  | 3.7790581231e-07  |
| 124 | 6               | 2               | 9143              | 47333           | 54     | 10                  | 41              | 2               | 7               | 59.684  | 3.7790581231e-07  |
| 125 | 6               | 2               | 10794             | 33959           | 68     | 20                  | 36              | 2               | 6               | 49.564  | 3.42059713887e-13 |
| 126 | 6               | 2               | 865               | 10270           | 10     | 0                   | 1               | 1               | 5               | 19.371  | 3.7790581231e-07  |
| 127 | 6               | 3               | 4641              | 17733           | 48     | 7                   | 21              | 2               | 5               | 46.211  | 3.7790581231e-07  |
| 128 | 6               | 10              | 10945             | 3023            | 11     | 11                  | 0               | 3               | 3               | 18.915  | 3.7790581231e-07  |
| 129 | 6               | 10              | 8006              | 7614            | 26     | 2                   | 1               | 3               | 3               | 38.955  | 3.7790581231e-07  |
| 130 | 6               | 10              | 34995             | 43255           | 50     | 20                  | 25              | 5               | 6               | 51.968  | 0.0               |
| 131 | 6               | 10              | 13482             | 9515            | 26     | 14                  | 1               | 4               | 4               | 29.609  | 3.7790581231e-07  |
| 132 | 6               | 10              | 17179             | 13949           | 37     | 9                   | 2               | 4               | 4               | 54.152  | 3.7790581231e-07  |
| 133 | 6               | 10              | 15564             | 7536            | 20     | 13                  | 3               | 3               | 3               | 20.984  | 3.7790581231e-07  |
| 134 | 6               | 10              | 24813             | 9108            | 44     | 34                  | 0               | 3               | 4               | 33.872  | 3.7790581231e-07  |
| 135 | 6               | 10              | 27562             | 20748           | 30     | 22                  | 4               | 7               | 6               | 31.159  | 3.7790581231e-07  |
| 136 | 6               | 10              | 12515             | 7498            | 24     | 6                   | 0               | 3               | 2               | 35.401  | 3.7790581231e-07  |
| 137 | 6               | 10              | 8655              | 6921            | 28     | 9                   | 0               | 2               | 4               | 40.850  | 3.7790581231e-07  |
| 138 | 6               | 12              | 24282             | 31966           | 89     | 30                  | 30              | 3               | 8               | 65.020  | 1.09956488359e-12 |
| 139 | 6               | 13              | 22915             | 21927           | 38     | 12                  | 7               | 5               | 4               | 50.647  | 3.7790581231e-07  |
| 140 | 6               | 13              | 20265             | 11406           | 31     | 11                  | 0               | 5               | 4               | 36.637  | 3.7790581231e-07  |
| 141 | 6               | 13              | 9890              | 42636           | 94     | 0                   | 53              | 3               | 3               | 84.465  | 3.7790581231e-07  |
| 142 | 6               | 15              | 9803              | 8613            | 16     | 4                   | 2               | 2               | 3               | 22.476  | 3.7790581231e-07  |
| 143 | 6               | 15              | 10664             | 5787            | 25     | 5                   | 0               | 3               | 2               | 34.504  | 3.7790581231e-07  |
| 144 | 6               | 15              | 39119             | 5356            | 50     | 35                  | 0               | 5               | 2               | 52.542  | 3.7790581231e-07  |
| 145 | 6               | 15              | 6258              | 6049            | 18     | 1                   | 0               | 2               | 2               | 25.585  | 3.7790581231e-07  |
| 146 | 7               | 2               | 1950              | 33962           | 43     | 0                   | 37              | 1               | 6               | 49.904  | 3.7790581231e-07  |
| 147 | 7               | 3               | 1972              | 17985           | 36     | 2                   | 20              | 1               | 5               | 43.437  | 3.7790581231e-07  |
| 148 | 7               | 3               | 1824              | 17736           | 36     | 0                   | 20              | 1               | 5               | 38.696  | 3.7790581231e-07  |
| 149 | 7               | 3               | 24403             | 27292           | 59     | 18                  | 40              | 4               | 3               | 34.554  | 3.31538574372e-10 |
| 150 | 7               | 5               | 5850              | 21808           | 40     | 1                   | 32              | 3               | 4               | 42.182  | 3.7790581231e-07  |
| 151 | 7               | 5               | 221235            | 133839          | 265    | 195                 | 41              | 42              | 42              | 258.029 | 0.0               |
| 152 | 7               | 5               | 43085             | 8333            | 35     | 32                  | 0               | 6               | 4               | 29.628  | 3.7790581231e-07  |
| 153 | 7               | 5               | 47735             | 32688           | 49     | 31                  | 17              | 10              | 10              | 45.621  | 0.0               |
| 154 | 7               | 5               | 8225              | 13807           | 34     | 0                   | 3               | 4               | 5               | 51.363  | 3.7790581231e-07  |

Continued on next page

Table ST-5 – continued from previous page

| #   | Scaffold        |                 | Cluster size (bp) |                 | # Hits | # Unaccounted exons |                 | # Genes found   |                 | score   | p-value           |
|-----|-----------------|-----------------|-------------------|-----------------|--------|---------------------|-----------------|-----------------|-----------------|---------|-------------------|
|     | <i>S. comm.</i> | <i>A. bisp.</i> | <i>S. comm.</i>   | <i>A. bisp.</i> |        | <i>S. comm.</i>     | <i>A. bisp.</i> | <i>S. comm.</i> | <i>A. bisp.</i> |         |                   |
| 155 | 7               | 5               | 15110             | 9718            | 20     | 11                  | 8               | 3               | 3               | 19.060  | 3.7790581231e-07  |
| 156 | 7               | 5               | 69967             | 46989           | 156    | 81                  | 63              | 13              | 10              | 73.676  | 2.68451927354e-13 |
| 157 | 7               | 5               | 31802             | 43406           | 94     | 36                  | 47              | 7               | 10              | 70.324  | 0.0               |
| 158 | 7               | 5               | 19778             | 16261           | 45     | 18                  | 2               | 5               | 5               | 62.976  | 3.7790581231e-07  |
| 159 | 7               | 5               | 4826              | 7020            | 11     | 0                   | 1               | 2               | 3               | 19.160  | 3.7790581231e-07  |
| 160 | 7               | 5               | 7122              | 6783            | 17     | 1                   | 0               | 4               | 2               | 28.022  | 3.7790581231e-07  |
| 161 | 7               | 5               | 9096              | 22571           | 29     | 1                   | 19              | 4               | 4               | 39.493  | 3.7790581231e-07  |
| 162 | 7               | 5               | 22780             | 13393           | 33     | 17                  | 10              | 4               | 4               | 41.322  | 3.7790581231e-07  |
| 163 | 7               | 5               | 35456             | 32700           | 44     | 15                  | 15              | 10              | 10              | 64.862  | 0.0               |
| 164 | 7               | 5               | 25012             | 24874           | 47     | 14                  | 27              | 7               | 6               | 58.428  | 0.0               |
| 165 | 7               | 5               | 21469             | 19943           | 43     | 10                  | 16              | 6               | 5               | 49.744  | 3.7790581231e-07  |
| 166 | 7               | 5               | 34275             | 24373           | 49     | 26                  | 7               | 9               | 9               | 64.268  | 3.7790581231e-07  |
| 167 | 7               | 5               | 15610             | 18879           | 35     | 4                   | 9               | 5               | 5               | 47.500  | 3.7790581231e-07  |
| 168 | 7               | 5               | 31774             | 16626           | 51     | 30                  | 6               | 7               | 6               | 53.806  | 3.7790581231e-07  |
| 169 | 7               | 5               | 22957             | 20254           | 51     | 11                  | 7               | 9               | 7               | 75.476  | 3.7790581231e-07  |
| 170 | 7               | 5               | 10556             | 15973           | 19     | 3                   | 13              | 3               | 3               | 25.488  | 3.7790581231e-07  |
| 171 | 7               | 5               | 26572             | 32863           | 49     | 18                  | 24              | 9               | 9               | 46.545  | 0.0               |
| 172 | 7               | 5               | 7116              | 6946            | 22     | 2                   | 1               | 4               | 3               | 35.215  | 3.7790581231e-07  |
| 173 | 7               | 5               | 24182             | 9478            | 33     | 28                  | 1               | 4               | 4               | 29.766  | 3.7790581231e-07  |
| 174 | 7               | 5               | 38110             | 24395           | 61     | 35                  | 9               | 8               | 8               | 73.862  | 3.7790581231e-07  |
| 175 | 7               | 5               | 15560             | 15675           | 31     | 6                   | 1               | 6               | 6               | 49.053  | 3.7790581231e-07  |
| 176 | 7               | 7               | 2432              | 18723           | 43     | 2                   | 28              | 1               | 5               | 53.483  | 3.7790581231e-07  |
| 177 | 7               | 11              | 4139              | 4988            | 20     | 1                   | 3               | 2               | 3               | 28.501  | 3.7790581231e-07  |
| 178 | 7               | 12              | 1811              | 32213           | 54     | 0                   | 18              | 1               | 8               | 51.912  | 3.7790581231e-07  |
| 179 | 7               | 12              | 17074             | 31972           | 54     | 22                  | 27              | 2               | 8               | 38.015  | 2.68849387197e-11 |
| 180 | 7               | 12              | 13166             | 32180           | 59     | 15                  | 21              | 2               | 9               | 66.604  | 0.0               |
| 181 | 7               | 15              | 2115              | 32919           | 43     | 2                   | 33              | 1               | 5               | 37.454  | 3.7790581231e-07  |
| 182 | 7               | 16              | 29228             | 30636           | 44     | 5                   | 11              | 6               | 6               | 57.370  | 3.7790581231e-07  |
| 183 | 8               | 3               | 18407             | 2175            | 39     | 3                   | 0               | 4               | 1               | 64.188  | 3.7790581231e-07  |
| 184 | 8               | 3               | 4631              | 17982           | 57     | 7                   | 20              | 2               | 5               | 69.966  | 3.7790581231e-07  |
| 185 | 8               | 3               | 8725              | 36057           | 103    | 13                  | 67              | 3               | 7               | 115.708 | 0.0               |
| 186 | 8               | 5               | 13124             | 10819           | 33     | 10                  | 4               | 3               | 3               | 42.735  | 3.7790581231e-07  |
| 187 | 8               | 5               | 22388             | 10807           | 27     | 15                  | 4               | 4               | 4               | 35.329  | 3.7790581231e-07  |
| 188 | 8               | 5               | 22551             | 21149           | 49     | 10                  | 6               | 8               | 8               | 81.058  | 3.7790581231e-07  |
| 189 | 8               | 5               | 17831             | 19355           | 30     | 6                   | 16              | 7               | 6               | 32.590  | 3.7790581231e-07  |
| 190 | 8               | 5               | 5182              | 5027            | 13     | 2                   | 0               | 3               | 3               | 23.205  | 3.7790581231e-07  |
| 191 | 8               | 5               | 5565              | 8997            | 26     | 0                   | 9               | 3               | 3               | 29.200  | 3.7790581231e-07  |
| 192 | 8               | 5               | 60885             | 36453           | 88     | 43                  | 12              | 10              | 10              | 87.418  | 0.0               |
| 193 | 8               | 5               | 104210            | 57665           | 129    | 102                 | 27              | 17              | 18              | 142.627 | 0.0               |
| 194 | 8               | 5               | 9592              | 4756            | 11     | 9                   | 1               | 3               | 3               | 17.500  | 3.7790581231e-07  |
| 195 | 8               | 5               | 9213              | 7679            | 23     | 3                   | 1               | 3               | 3               | 30.957  | 3.7790581231e-07  |
| 196 | 8               | 5               | 14499             | 7760            | 14     | 4                   | 1               | 3               | 3               | 22.738  | 3.7790581231e-07  |
| 197 | 8               | 5               | 19320             | 20351           | 21     | 9                   | 6               | 6               | 6               | 21.780  | 3.7790581231e-07  |
| 198 | 8               | 5               | 16018             | 13166           | 28     | 6                   | 2               | 4               | 5               | 40.009  | 3.7790581231e-07  |
| 199 | 8               | 5               | 10718             | 11611           | 25     | 3                   | 7               | 5               | 5               | 29.681  | 3.7790581231e-07  |
| 200 | 8               | 5               | 37077             | 13834           | 44     | 36                  | 1               | 7               | 7               | 48.645  | 3.7790581231e-07  |
| 201 | 8               | 5               | 6917              | 15538           | 21     | 0                   | 5               | 5               | 5               | 30.659  | 3.7790581231e-07  |
| 202 | 8               | 5               | 117444            | 66564           | 157    | 86                  | 25              | 17              | 15              | 144.293 | 0.0               |
| 203 | 8               | 5               | 89424             | 50537           | 130    | 95                  | 18              | 19              | 18              | 124.609 | 0.0               |
| 204 | 8               | 5               | 5829              | 4789            | 12     | 0                   | 0               | 3               | 3               | 20.062  | 3.7790581231e-07  |
| 205 | 8               | 5               | 10897             | 11215           | 22     | 15                  | 4               | 3               | 4               | 28.883  | 3.7790581231e-07  |
| 206 | 8               | 5               | 4273              | 3556            | 10     | 2                   | 1               | 2               | 3               | 15.558  | 3.7790581231e-07  |
| 207 | 8               | 5               | 19234             | 9259            | 31     | 7                   | 12              | 3               | 2               | 31.246  | 3.7790581231e-07  |
| 208 | 8               | 5               | 1819              | 2574            | 11     | 0                   | 1               | 2               | 3               | 19.811  | 3.7790581231e-07  |
| 209 | 8               | 6               | 8740              | 2328            | 29     | 6                   | 0               | 3               | 1               | 38.610  | 3.7790581231e-07  |

Continued on next page

Table ST-5 – continued from previous page

| #   | Scaffold        |                 | Cluster size (bp) |                 | # Hits | # Unaccounted exons |                 | # Genes found   |                 | score   | p-value           |
|-----|-----------------|-----------------|-------------------|-----------------|--------|---------------------|-----------------|-----------------|-----------------|---------|-------------------|
|     | <i>S. comm.</i> | <i>A. bisp.</i> | <i>S. comm.</i>   | <i>A. bisp.</i> |        | <i>S. comm.</i>     | <i>A. bisp.</i> | <i>S. comm.</i> | <i>A. bisp.</i> |         |                   |
| 210 | 8               | 7               | 4689              | 11566           | 20     | 3                   | 15              | 2               | 3               | 18.586  | 3.7790581231e-07  |
| 211 | 8               | 7               | 2428              | 18726           | 44     | 4                   | 27              | 1               | 5               | 54.882  | 3.7790581231e-07  |
| 212 | 8               | 9               | 8740              | 15856           | 49     | 7                   | 15              | 3               | 2               | 57.478  | 3.7790581231e-07  |
| 213 | 8               | 10              | 8725              | 4489            | 38     | 15                  | 3               | 3               | 2               | 39.839  | 3.7790581231e-07  |
| 214 | 8               | 10              | 8740              | 2101            | 24     | 11                  | 1               | 3               | 1               | 26.685  | 3.7790581231e-07  |
| 215 | 8               | 12              | 8737              | 7187            | 50     | 8                   | 4               | 3               | 2               | 75.933  | 3.7790581231e-07  |
| 216 | 8               | 12              | 28627             | 35240           | 146    | 48                  | 26              | 4               | 9               | 162.062 | 0.0               |
| 217 | 8               | 12              | 8737              | 20933           | 44     | 10                  | 22              | 3               | 2               | 43.848  | 3.7790581231e-07  |
| 218 | 8               | 12              | 5039              | 32168           | 94     | 4                   | 21              | 2               | 8               | 106.743 | 3.7790581231e-07  |
| 219 | 8               | 12              | 1291              | 10031           | 16     | 2                   | 13              | 1               | 4               | 19.329  | 3.7790581231e-07  |
| 220 | 8               | 15              | 28978             | 5619            | 49     | 24                  | 0               | 7               | 2               | 68.664  | 3.7790581231e-07  |
| 221 | 8               | 15              | 8731              | 32931           | 104    | 11                  | 38              | 3               | 5               | 110.060 | 0.0               |
| 222 | 8               | 15              | 13302             | 43594           | 74     | 11                  | 49              | 3               | 7               | 62.615  | 0.0               |
| 223 | 8               | 16              | 8737              | 29094           | 81     | 12                  | 58              | 3               | 4               | 61.562  | 0.0               |
| 224 | 8               | 16              | 26882             | 15692           | 39     | 30                  | 3               | 3               | 3               | 35.417  | 3.7790581231e-07  |
| 225 | 8               | 16              | 7269              | 12409           | 25     | 1                   | 11              | 3               | 3               | 28.526  | 3.7790581231e-07  |
| 226 | 8               | 17              | 2328              | 24082           | 42     | 1                   | 16              | 1               | 4               | 53.220  | 3.7790581231e-07  |
| 227 | 9               | 2               | 818               | 10267           | 9      | 0                   | 2               | 1               | 5               | 16.678  | 3.7790581231e-07  |
| 228 | 9               | 3               | 1458              | 17376           | 31     | 1                   | 21              | 1               | 5               | 28.408  | 3.7790581231e-07  |
| 229 | 9               | 3               | 1828              | 17531           | 28     | 2                   | 23              | 1               | 5               | 32.278  | 3.7790581231e-07  |
| 230 | 9               | 3               | 15003             | 36054           | 90     | 18                  | 63              | 3               | 7               | 80.350  | 0.0               |
| 231 | 9               | 3               | 1981              | 17985           | 37     | 3                   | 18              | 1               | 5               | 32.056  | 3.7790581231e-07  |
| 232 | 9               | 6               | 15262             | 2328            | 22     | 13                  | 1               | 3               | 1               | 26.660  | 3.7790581231e-07  |
| 233 | 9               | 8               | 63446             | 16802           | 43     | 19                  | 6               | 7               | 3               | 55.595  | 3.7790581231e-07  |
| 234 | 9               | 8               | 33156             | 34010           | 48     | 27                  | 16              | 7               | 6               | 34.391  | 4.61944926755e-10 |
| 235 | 9               | 8               | 14262             | 25920           | 34     | 9                   | 25              | 4               | 4               | 38.249  | 3.7790581231e-07  |
| 236 | 9               | 8               | 37661             | 34567           | 119    | 40                  | 26              | 6               | 7               | 75.003  | 2.70013867931e-08 |
| 237 | 9               | 8               | 7740              | 15904           | 18     | 0                   | 7               | 3               | 3               | 24.461  | 3.7790581231e-07  |
| 238 | 9               | 8               | 8144              | 5390            | 21     | 3                   | 0               | 2               | 3               | 27.943  | 3.7790581231e-07  |
| 239 | 9               | 9               | 24320             | 7187            | 40     | 31                  | 5               | 3               | 2               | 30.656  | 3.7790581231e-07  |
| 240 | 9               | 9               | 11743             | 29810           | 21     | 9                   | 11              | 2               | 3               | 27.336  | 3.7790581231e-07  |
| 241 | 9               | 9               | 10248             | 13597           | 23     | 1                   | 8               | 3               | 3               | 33.984  | 3.7790581231e-07  |
| 242 | 9               | 9               | 12759             | 15701           | 28     | 12                  | 6               | 4               | 5               | 43.188  | 3.7790581231e-07  |
| 243 | 9               | 9               | 9408              | 16816           | 31     | 0                   | 7               | 4               | 3               | 37.866  | 3.7790581231e-07  |
| 244 | 9               | 9               | 12111             | 4980            | 19     | 13                  | 0               | 3               | 2               | 27.283  | 3.7790581231e-07  |
| 245 | 9               | 9               | 16413             | 12404           | 37     | 16                  | 5               | 5               | 5               | 37.339  | 3.7790581231e-07  |
| 246 | 9               | 9               | 15005             | 1780            | 20     | 15                  | 1               | 3               | 1               | 20.234  | 3.7790581231e-07  |
| 247 | 9               | 9               | 15006             | 2085            | 21     | 14                  | 0               | 3               | 1               | 22.585  | 3.7790581231e-07  |
| 248 | 9               | 9               | 28188             | 28917           | 77     | 23                  | 37              | 8               | 8               | 75.462  | 0.0               |
| 249 | 9               | 9               | 15965             | 28898           | 41     | 12                  | 21              | 4               | 3               | 40.667  | 2.77555756156e-15 |
| 250 | 9               | 9               | 11291             | 7252            | 16     | 10                  | 5               | 2               | 3               | 16.915  | 3.7790581231e-07  |
| 251 | 9               | 10              | 14991             | 4295            | 33     | 16                  | 4               | 3               | 2               | 32.184  | 3.7790581231e-07  |
| 252 | 9               | 12              | 15253             | 7187            | 46     | 11                  | 4               | 3               | 2               | 57.919  | 3.7790581231e-07  |
| 253 | 9               | 12              | 123813            | 57794           | 210    | 154                 | 51              | 8               | 11              | 149.025 | 0.0               |
| 254 | 9               | 12              | 2234              | 31972           | 50     | 4                   | 29              | 1               | 8               | 39.174  | 3.7790581231e-07  |
| 255 | 9               | 12              | 6505              | 45805           | 56     | 7                   | 43              | 3               | 10              | 44.523  | 3.7790581231e-07  |
| 256 | 9               | 13              | 9774              | 43751           | 34     | 12                  | 20              | 3               | 8               | 38.372  | 0.0               |
| 257 | 9               | 15              | 36896             | 37251           | 100    | 49                  | 41              | 5               | 6               | 73.676  | 0.0               |
| 258 | 9               | 15              | 2114              | 32645           | 39     | 2                   | 36              | 1               | 5               | 23.742  | 3.7790581231e-07  |
| 259 | 9               | 16              | 14976             | 29085           | 75     | 14                  | 61              | 3               | 4               | 40.752  | 1.0953460361e-11  |
| 260 | 9               | 17              | 16440             | 3908            | 24     | 17                  | 2               | 5               | 2               | 22.175  | 3.7790581231e-07  |
| 261 | 9               | 19              | 15253             | 1939            | 19     | 16                  | 1               | 3               | 1               | 20.033  | 3.7790581231e-07  |
| 262 | 10              | 3               | 54094             | 55085           | 171    | 76                  | 94              | 6               | 9               | 131.622 | 0.0               |
| 263 | 10              | 9               | 9022              | 15844           | 47     | 12                  | 18              | 4               | 2               | 40.409  | 2.68436384232e-10 |
| 264 | 10              | 10              | 9037              | 1865            | 33     | 7                   | 0               | 4               | 1               | 39.527  | 3.7790581231e-07  |

Continued on next page



Table ST-5 – continued from previous page

| #   | Scaffold        |                 | Cluster size (bp) |                 | # Hits | # Unaccounted exons |                 | # Genes found   |                 | score   | p-value           |
|-----|-----------------|-----------------|-------------------|-----------------|--------|---------------------|-----------------|-----------------|-----------------|---------|-------------------|
|     | <i>S. comm.</i> | <i>A. bisp.</i> | <i>S. comm.</i>   | <i>A. bisp.</i> |        | <i>S. comm.</i>     | <i>A. bisp.</i> | <i>S. comm.</i> | <i>A. bisp.</i> |         |                   |
| 265 | 10              | 11              | 35419             | 7085            | 24     | 19                  | 0               | 3               | 3               | 25.210  | 3.7790581231e-07  |
| 266 | 10              | 11              | 41564             | 41557           | 68     | 33                  | 20              | 6               | 6               | 71.756  | 0.0               |
| 267 | 10              | 11              | 23310             | 37147           | 44     | 9                   | 15              | 7               | 7               | 49.594  | 3.7790581231e-07  |
| 268 | 10              | 11              | 13264             | 12915           | 24     | 2                   | 4               | 2               | 3               | 32.626  | 3.7790581231e-07  |
| 269 | 10              | 11              | 3691              | 7074            | 12     | 2                   | 4               | 2               | 3               | 17.403  | 3.7790581231e-07  |
| 270 | 10              | 11              | 5204              | 9795            | 39     | 0                   | 0               | 2               | 3               | 59.802  | 3.7790581231e-07  |
| 271 | 10              | 11              | 12865             | 9110            | 19     | 10                  | 4               | 2               | 3               | 22.819  | 3.7790581231e-07  |
| 272 | 10              | 11              | 8242              | 11608           | 18     | 2                   | 1               | 3               | 3               | 28.775  | 3.7790581231e-07  |
| 273 | 10              | 11              | 12106             | 9001            | 13     | 3                   | 0               | 4               | 4               | 23.461  | 3.7790581231e-07  |
| 274 | 10              | 11              | 13764             | 7103            | 18     | 9                   | 7               | 3               | 3               | 20.016  | 3.7790581231e-07  |
| 275 | 10              | 11              | 17845             | 44596           | 49     | 4                   | 45              | 4               | 3               | 29.856  | 3.7790581231e-07  |
| 276 | 10              | 11              | 59001             | 44921           | 87     | 33                  | 26              | 11              | 10              | 100.474 | 0.0               |
| 277 | 10              | 12              | 24777             | 24432           | 58     | 27                  | 27              | 5               | 3               | 34.038  | 6.68513744362e-09 |
| 278 | 10              | 12              | 9040              | 20933           | 53     | 8                   | 21              | 4               | 3               | 41.766  | 3.7790581231e-07  |
| 279 | 10              | 12              | 82243             | 54130           | 173    | 95                  | 62              | 9               | 11              | 82.234  | 5.01820807131e-14 |
| 280 | 10              | 12              | 7860              | 32180           | 39     | 6                   | 29              | 2               | 9               | 35.956  | 3.7790581231e-07  |
| 281 | 10              | 15              | 42901             | 32663           | 143    | 57                  | 35              | 5               | 5               | 115.694 | 0.0               |
| 282 | 10              | 16              | 9019              | 29061           | 91     | 14                  | 63              | 4               | 4               | 65.899  | 0.0               |
| 283 | 11              | 2               | 7096              | 10216           | 19     | 7                   | 1               | 2               | 5               | 25.635  | 3.7790581231e-07  |
| 284 | 11              | 2               | 20172             | 6287            | 25     | 18                  | 4               | 3               | 2               | 25.821  | 3.7790581231e-07  |
| 285 | 11              | 3               | 9539              | 17982           | 39     | 8                   | 18              | 2               | 5               | 36.381  | 3.7790581231e-07  |
| 286 | 11              | 4               | 18876             | 4148            | 25     | 23                  | 0               | 5               | 4               | 23.577  | 3.7790581231e-07  |
| 287 | 11              | 8               | 9812              | 8227            | 20     | 3                   | 0               | 4               | 4               | 28.703  | 3.7790581231e-07  |
| 288 | 11              | 8               | 30561             | 19197           | 36     | 26                  | 1               | 6               | 5               | 49.050  | 3.7790581231e-07  |
| 289 | 11              | 8               | 5733              | 5979            | 15     | 1                   | 1               | 3               | 3               | 24.747  | 3.7790581231e-07  |
| 290 | 11              | 8               | 67745             | 35645           | 49     | 37                  | 8               | 8               | 8               | 61.895  | 3.7790581231e-07  |
| 291 | 11              | 8               | 17431             | 16509           | 28     | 15                  | 1               | 5               | 5               | 37.799  | 3.7790581231e-07  |
| 292 | 11              | 8               | 17509             | 6236            | 25     | 15                  | 7               | 4               | 2               | 22.477  | 3.7790581231e-07  |
| 293 | 11              | 12              | 9746              | 32207           | 48     | 8                   | 20              | 2               | 8               | 52.696  | 3.7790581231e-07  |
| 294 | 11              | 15              | 9749              | 19745           | 38     | 8                   | 23              | 2               | 4               | 33.013  | 3.7790581231e-07  |
| 295 | 12              | 2               | 4376              | 30494           | 44     | 4                   | 8               | 2               | 5               | 53.261  | 3.7790581231e-07  |
| 296 | 12              | 3               | 35666             | 31858           | 59     | 25                  | 22              | 10              | 11              | 63.713  | 0.0               |
| 297 | 12              | 3               | 9293              | 15939           | 34     | 5                   | 24              | 2               | 3               | 28.941  | 3.7790581231e-07  |
| 298 | 12              | 3               | 15005             | 10905           | 24     | 3                   | 6               | 3               | 2               | 32.661  | 3.7790581231e-07  |
| 299 | 12              | 3               | 35733             | 20712           | 107    | 29                  | 31              | 14              | 6               | 104.150 | 0.0               |
| 300 | 12              | 3               | 80238             | 68004           | 192    | 54                  | 43              | 15              | 14              | 213.461 | 0.0               |
| 301 | 13              | 1               | 16572             | 16853           | 32     | 4                   | 13              | 6               | 7               | 51.016  | 3.7790581231e-07  |
| 302 | 13              | 1               | 79802             | 52160           | 125    | 46                  | 13              | 20              | 18              | 160.103 | 0.0               |
| 303 | 13              | 1               | 9535              | 7992            | 21     | 2                   | 3               | 3               | 3               | 30.600  | 3.7790581231e-07  |
| 304 | 13              | 1               | 221375            | 239035          | 417    | 158                 | 226             | 66              | 64              | 384.664 | 0.0               |
| 305 | 13              | 1               | 9160              | 6574            | 25     | 2                   | 0               | 3               | 2               | 35.334  | 3.7790581231e-07  |
| 306 | 13              | 1               | 10722             | 9124            | 32     | 1                   | 2               | 3               | 2               | 43.547  | 3.7790581231e-07  |
| 307 | 13              | 1               | 23242             | 4281            | 22     | 13                  | 0               | 4               | 2               | 24.058  | 3.7790581231e-07  |
| 308 | 13              | 1               | 27528             | 13887           | 23     | 21                  | 0               | 4               | 4               | 33.506  | 3.7790581231e-07  |
| 309 | 13              | 1               | 42067             | 8603            | 55     | 14                  | 2               | 7               | 3               | 72.229  | 3.7790581231e-07  |
| 310 | 13              | 1               | 4873              | 3921            | 15     | 1                   | 0               | 3               | 4               | 24.961  | 3.7790581231e-07  |
| 311 | 13              | 1               | 33031             | 11293           | 33     | 27                  | 2               | 5               | 4               | 41.249  | 3.7790581231e-07  |
| 312 | 13              | 1               | 27863             | 34948           | 66     | 9                   | 54              | 7               | 7               | 55.266  | 3.7790581231e-07  |
| 313 | 13              | 1               | 34872             | 29466           | 94     | 14                  | 0               | 9               | 9               | 135.941 | 3.7790581231e-07  |
| 314 | 13              | 1               | 92218             | 74285           | 153    | 41                  | 22              | 20              | 22              | 197.376 | 0.0               |
| 315 | 14              | 9               | 15018             | 11097           | 47     | 22                  | 10              | 3               | 4               | 46.151  | 3.7790581231e-07  |
| 316 | 14              | 9               | 13423             | 11085           | 29     | 14                  | 10              | 2               | 4               | 28.344  | 3.7790581231e-07  |
| 317 | 14              | 12              | 31159             | 30624           | 42     | 17                  | 17              | 6               | 4               | 39.877  | 4.06341627013e-14 |
| 318 | 14              | 17              | 13939             | 6580            | 16     | 4                   | 1               | 3               | 3               | 23.421  | 3.7790581231e-07  |
| 319 | 15              | 10              | 67009             | 2602            | 25     | 14                  | 1               | 8               | 2               | 34.173  | 3.7790581231e-07  |

Continued on next page

Table ST-5 – continued from previous page

| #   | Scaffold |          | Cluster size (bp) |          | # Hits | # Unaccounted exons |          | # Genes found |          | score   | p-value           |
|-----|----------|----------|-------------------|----------|--------|---------------------|----------|---------------|----------|---------|-------------------|
|     | S. comm. | A. bisp. | S. comm.          | A. bisp. |        | S. comm.            | A. bisp. | S. comm.      | A. bisp. |         |                   |
| 320 | 16       | 1        | 653               | 9474     | 15     | 0                   | 3        | 1             | 3        | 24.661  | 3.7790581231e-07  |
| 321 | 16       | 1        | 26949             | 23776    | 30     | 12                  | 10       | 7             | 4        | 31.298  | 3.7790581231e-07  |
| 322 | 16       | 1        | 105530            | 62101    | 103    | 89                  | 14       | 21            | 16       | 98.072  | 0.0               |
| 323 | 16       | 1        | 4665              | 5803     | 18     | 1                   | 2        | 3             | 3        | 30.489  | 3.7790581231e-07  |
| 324 | 16       | 12       | 1269              | 10001    | 21     | 0                   | 8        | 1             | 4        | 28.131  | 3.7790581231e-07  |
| 325 | 16       | 17       | 22719             | 25047    | 28     | 17                  | 4        | 4             | 4        | 31.107  | 3.7790581231e-07  |
| 326 | 16       | 17       | 17290             | 65708    | 102    | 25                  | 44       | 5             | 5        | 81.285  | 0.0               |
| 327 | 17       | 1        | 38869             | 7128     | 27     | 19                  | 3        | 5             | 2        | 33.437  | 3.7790581231e-07  |
| 328 | 17       | 1        | 19417             | 11370    | 33     | 12                  | 1        | 5             | 4        | 45.186  | 3.7790581231e-07  |
| 329 | 17       | 3        | 9418              | 1541     | 21     | 5                   | 1        | 4             | 1        | 27.002  | 3.7790581231e-07  |
| 330 | 17       | 6        | 9367              | 1719     | 25     | 2                   | 1        | 4             | 1        | 34.161  | 3.7790581231e-07  |
| 331 | 17       | 12       | 1678              | 21450    | 32     | 0                   | 19       | 1             | 5        | 29.174  | 3.7790581231e-07  |
| 332 | 17       | 12       | 9469              | 21881    | 104    | 4                   | 19       | 4             | 5        | 151.651 | 3.7790581231e-07  |
| 333 | 17       | 15       | 6536              | 1559     | 20     | 0                   | 0        | 3             | 1        | 33.829  | 3.7790581231e-07  |
| 334 | 18       | 4        | 5466              | 9619     | 13     | 0                   | 3        | 3             | 3        | 22.468  | 3.7790581231e-07  |
| 335 | 18       | 4        | 8010              | 2049     | 16     | 7                   | 0        | 3             | 1        | 24.100  | 3.7790581231e-07  |
| 336 | 18       | 4        | 18842             | 2034     | 22     | 15                  | 0        | 4             | 1        | 31.423  | 3.7790581231e-07  |
| 337 | 18       | 4        | 18842             | 2019     | 22     | 15                  | 0        | 4             | 1        | 32.604  | 3.7790581231e-07  |
| 338 | 18       | 4        | 8013              | 2019     | 16     | 7                   | 0        | 3             | 1        | 25.041  | 3.7790581231e-07  |
| 339 | 18       | 13       | 1896              | 26505    | 25     | 1                   | 23       | 2             | 8        | 23.805  | 3.7790581231e-07  |
| 340 | 19       | 6        | 6253              | 12424    | 30     | 1                   | 1        | 2             | 4        | 46.496  | 3.7790581231e-07  |
| 341 | 19       | 12       | 8736              | 16012    | 11     | 0                   | 6        | 3             | 2        | 17.388  | 3.7790581231e-07  |
| 342 | 19       | 12       | 27643             | 49872    | 63     | 23                  | 13       | 5             | 7        | 60.241  | 5.21804821574e-15 |
| 343 | 20       | 3        | 5050              | 36211    | 85     | 7                   | 58       | 2             | 7        | 57.662  | 3.7790581231e-07  |
| 344 | 20       | 4        | 68492             | 27605    | 108    | 83                  | 9        | 10            | 10       | 100.639 | 3.7790581231e-07  |
| 345 | 20       | 12       | 5056              | 32207    | 92     | 7                   | 19       | 2             | 8        | 86.391  | 3.7790581231e-07  |

Table ST-6: Clusters discovered by i-ADHoRe for the aspergillus genomes

| #  | Scaffold |           | Cluster size (bp) |           | # Hits | # Unaccounted exons |           | # Genes found |           | score          | p-value           |
|----|----------|-----------|-------------------|-----------|--------|---------------------|-----------|---------------|-----------|----------------|-------------------|
|    | n402     | CBS513.88 | n402              | CBS513.88 |        | n402                | CBS513.88 | n402          | CBS513.88 |                |                   |
| 1  | 1        | 5         | 40021             | 122055    | 26     | 24                  | 22        | 9             | 12        | -20.4141421598 | 0.729051902543    |
| 2  | 1        | 5         | 40021             | 45920     | 26     | 24                  | 22        | 4             | 4         | -20.4141421598 | 0.729051902543    |
| 3  | 1        | 5         | 58072             | 33316     | 5      | 45                  | 35        | 3             | 3         | -56.5918208263 | 0.297             |
| 4  | 1        | 7         | 45679             | 61636     | 3      | 29                  | 35        | 3             | 3         | -45.7150461704 | 0.327             |
| 5  | 1        | 9         | 2217697           | 2163025   | 1904   | 266                 | 367       | 55            | 55        | 2548.23660711  | 0.0               |
| 6  | 1        | 9         | 1136507           | 1103206   | 546    | 125                 | 168       | 31            | 31        | 912.03184605   | 0.0               |
| 7  | 1        | 9         | 1575693           | 1585561   | 2036   | 276                 | 380       | 445           | 448       | 2735.47356393  | 0.0               |
| 8  | 1        | 9         | 58072             | 319316    | 69     | 5                   | 309       | 11            | 14        | -132.17200032  | 0.000264410364886 |
| 9  | 1        | 9         | 100490            | 95989     | 37     | 69                  | 55        | 7             | 7         | -22.2871978916 | 0.0               |
| 10 | 2        | 12        | 86703             | 213817    | 11     | 94                  | 155       | 22            | 26        | -166.524685349 | 0.00357321696411  |
| 11 | 2        | 12        | 44163             | 47761     | 1      | 0                   | 0         | 3             | 3         | 0.893815635939 | 0.323             |
| 12 | 2        | 14        | 383412            | 403647    | 320    | 102                 | 140       | 56            | 57        | 458.420675827  | 0.0               |
| 13 | 2        | 14        | 1722871           | 1700162   | 2036   | 355                 | 424       | 519           | 518       | 2860.15967846  | 0.0               |
| 14 | 2        | 14        | 154390            | 35543     | 27     | 30                  | 10        | 10            | 8         | 22.0179296622  | 0.000264410364886 |
| 15 | 2        | 14        | 596364            | 56166     | 55     | 407                 | 18        | 15            | 12        | -225.684809437 | 1.31006316906e-14 |
| 16 | 2        | 14        | 27485             | 52192     | 5      | 4                   | 1         | 3             | 3         | 3.35800293811  | 0.015             |
| 17 | 3        | 13        | 904504            | 887459    | 1052   | 152                 | 223       | 259           | 257       | 1544.09057359  | 0.0               |
| 18 | 3        | 13        | 327355            | 64923     | 79     | 208                 | 20        | 25            | 22        | -6.27778542545 | 0.0               |
| 19 | 3        | 13        | 46017             | 34230     | 5      | 56                  | 43        | 3             | 3         | -76.5268809898 | 0.809             |
| 20 | 3        | 13        | 36356             | 57707     | 5      | 34                  | 72        | 3             | 3         | -81.4337072801 | 0.822             |
| 21 | 3        | 13        | 37643             | 63145     | 1      | 0                   | 0         | 3             | 3         | 0.0            | 1.0               |
| 22 | 4        | 1         | 3752509           | 3625678   | 5079   | 579                 | 666       | 1058          | 1065      | 6374.15106032  | 0.0               |

Continued on next page

Table ST-6 – continued from previous page

| #  | Scaffold |           | Cluster size (bp) |           | # Hits | # Unaccounted exons |           | # Genes found |           | score           | p-value           |
|----|----------|-----------|-------------------|-----------|--------|---------------------|-----------|---------------|-----------|-----------------|-------------------|
|    | n402     | CBS513.88 | n402              | CBS513.88 |        | n402                | CBS513.88 | n402          | CBS513.88 |                 |                   |
| 23 | 4        | 1         | 2820518           | 86375     | 118    | 2656                | 14        | 28            | 24        | -1927.67521918  | 8.63487141668e-05 |
| 24 | 4        | 1         | 2820518           | 2729411   | 3516   | 438                 | 568       | 56            | 56        | 4743.33625399   | 0.0               |
| 25 | 4        | 1         | 98843             | 2882735   | 110    | 24                  | 2824      | 24            | 26        | -1985.26568124  | 1.65580765077e-06 |
| 26 | 4        | 1         | 3477528           | 2882735   | 3656   | 810                 | 557       | 54            | 53        | 4621.33975418   | 0.0               |
| 27 | 4        | 1         | 237222            | 28654     | 23     | 70                  | 10        | 9             | 7         | -10.1997519811  | 0.000264410364886 |
| 28 | 4        | 1         | 46536             | 550878    | 79     | 10                  | 500       | 13            | 15        | -237.089697405  | 0.000264410364886 |
| 29 | 4        | 1         | 7306              | 7316      | 7      | 0                   | 4         | 3             | 3         | 10.774717506    | 0.000264410364886 |
| 30 | 4        | 3         | 152534            | 23256     | 2      | 28                  | 11        | 3             | 3         | -24.7538497153  | 0.05              |
| 31 | 4        | 5         | 98843             | 93729     | 7      | 85                  | 75        | 4             | 4         | -105.942899785  | 0.0065            |
| 32 | 4        | 9         | 46536             | 67774     | 3      | 26                  | 63        | 3             | 3         | -63.1234217036  | 0.228             |
| 33 | 5        | 5         | 158315            | 104824    | 47     | 106                 | 67        | 16            | 16        | -42.1300835789  | 0.0               |
| 34 | 5        | 5         | 308541            | 308770    | 337    | 55                  | 107       | 86            | 88        | 478.544311362   | 0.0               |
| 35 | 5        | 5         | 163265            | 163800    | 91     | 76                  | 111       | 27            | 29        | 25.8897772761   | 0.0               |
| 36 | 5        | 6         | 8342              | 282004    | 3      | 2                   | 2         | 4             | 7         | -0.109647626721 | 0.235             |
| 37 | 5        | 6         | 8342              | 9060      | 3      | 2                   | 2         | 3             | 3         | -0.109647626721 | 0.235             |
| 38 | 5        | 12        | 879060            | 875876    | 914    | 177                 | 235       | 185           | 186       | 1207.73877694   | 0.0               |
| 39 | 6        | 3         | 100003            | 32264     | 9      | 29                  | 22        | 3             | 3         | -36.901610158   | 0.861             |
| 40 | 6        | 3         | 78853             | 66971     | 8      | 61                  | 10        | 4             | 4         | -48.890721917   | 0.396             |
| 41 | 6        | 4         | 72298             | 44617     | 6      | 45                  | 53        | 3             | 3         | -73.1594245896  | 0.686             |
| 42 | 6        | 5         | 276374            | 285279    | 222    | 38                  | 67        | 69            | 69        | 362.40022466    | 0.0               |
| 43 | 6        | 11        | 115240            | 53383     | 10     | 13                  | 48        | 4             | 4         | -41.9086046428  | 0.727             |
| 44 | 6        | 12        | 607470            | 596231    | 632    | 136                 | 158       | 184           | 186       | 1072.71214394   | 0.0               |
| 45 | 6        | 12        | 608331            | 610507    | 635    | 73                  | 141       | 154           | 160       | 986.907941112   | 0.0               |
| 46 | 6        | 12        | 89800             | 89271     | 144    | 25                  | 40        | 34            | 34        | 205.387016335   | 0.0               |
| 47 | 6        | 16        | 86473             | 116132    | 12     | 113                 | 103       | 5             | 5         | -176.020833799  | 0.998808474987    |
| 48 | 7        | 12        | 281246            | 274504    | 245    | 66                  | 102       | 64            | 63        | 378.047599679   | 0.0               |
| 49 | 8        | 3         | 141881            | 112704    | 10     | 158                 | 140       | 5             | 5         | -223.953916687  | 0.595             |
| 50 | 8        | 3         | 37547             | 32347     | 10     | 29                  | 33        | 3             | 3         | -41.4453865921  | 0.552             |
| 51 | 8        | 11        | 129514            | 163458    | 17     | 130                 | 184       | 5             | 5         | -251.750251609  | 0.999189624783    |
| 52 | 8        | 15        | 863845            | 878049    | 755    | 138                 | 194       | 18            | 17        | 1171.32894186   | 0.0               |
| 53 | 8        | 15        | 370953            | 308984    | 291    | 88                  | 75        | 15            | 15        | 417.967240207   | 0.0               |
| 54 | 8        | 15        | 1872314           | 1854343   | 2149   | 309                 | 401       | 558           | 563       | 3120.94035874   | 0.0               |
| 55 | 8        | 15        | 1184300           | 167584    | 198    | 998                 | 36        | 53            | 47        | -498.190790861  | 0.0               |
| 56 | 8        | 15        | 1178744           | 1188240   | 1234   | 208                 | 254       | 79            | 76        | 1921.22000486   | 0.0               |
| 57 | 8        | 15        | 349606            | 36957     | 45     | 51                  | 2         | 11            | 8         | 37.0336616585   | 0.000264410364886 |
| 58 | 8        | 15        | 349606            | 324208    | 271    | 56                  | 72        | 18            | 18        | 444.894897232   | 0.0               |
| 59 | 8        | 15        | 37290             | 726015    | 36     | 2                   | 618       | 11            | 14        | -431.04848364   | 0.089             |
| 60 | 8        | 18        | 20923             | 89003     | 7      | 4                   | 47        | 4             | 4         | -35.62621943    | 0.69              |
| 61 | 8        | 18        | 37290             | 25225     | 3      | 25                  | 26        | 3             | 3         | -38.8449379196  | 0.7               |
| 62 | 9        | 7         | 2808667           | 2696397   | 2909   | 456                 | 508       | 24            | 22        | 4125.20094372   | 0.0               |
| 63 | 9        | 7         | 2424372           | 2340057   | 2939   | 455                 | 508       | 727           | 738       | 4157.29052953   | 0.0               |
| 64 | 9        | 7         | 99504             | 1698703   | 116    | 19                  | 1838      | 30            | 35        | -1231.0375883   | 1.3735655946e-08  |
| 65 | 9        | 7         | 26501             | 1182775   | 56     | 5                   | 1188      | 10            | 14        | -854.616070503  | 0.217             |
| 66 | 9        | 7         | 1186305           | 1179186   | 1301   | 228                 | 316       | 19            | 19        | 1944.47789525   | 0.0               |
| 67 | 9        | 7         | 1136507           | 61636     | 59     | 1090                | 10        | 18            | 16        | -750.492807397  | 0.000264410364886 |
| 68 | 9        | 7         | 708966            | 27259     | 30     | 601                 | 7         | 11            | 10        | -415.455842409  | 0.000528820729773 |
| 69 | 9        | 7         | 708966            | 649364    | 599    | 192                 | 195       | 25            | 26        | 919.490963889   | 0.0               |
| 70 | 9        | 11        | 16731             | 1680449   | 11     | 14                  | 1841      | 6             | 9         | -1413.86425825  | 0.8396645808      |
| 71 | 9        | 11        | 16731             | 12621     | 2      | 2                   | 0         | 3             | 3         | -1.30316239316  | 0.838             |
| 72 | 9        | 14        | 95605             | 403647    | 18     | 83                  | 392       | 28            | 32        | -335.711808773  | 0.0538199388762   |
| 73 | 9        | 14        | 95605             | 131183    | 12     | 87                  | 128       | 4             | 5         | -156.752134897  | 0.500258429049    |
| 74 | 9        | 15        | 22926             | 30510     | 5      | 24                  | 25        | 3             | 3         | -33.8059287997  | 0.426             |
| 75 | 9        | 17        | 167843            | 191502    | 12     | 189                 | 213       | 7             | 8         | -310.415988621  | 0.893775673984    |
| 76 | 10       | 2         | 3690350           | 3625572   | 5015   | 606                 | 726       | 1118          | 1131      | 6516.38647148   | 0.0               |
| 77 | 10       | 2         | 107473            | 2167445   | 143    | 16                  | 2274      | 28            | 33        | -1537.6841322   | 1.24547935076e-07 |

Continued on next page

Table ST-6 – continued from previous page

| #   | Scaffold |           | Cluster size (bp) |           | # Hits | # Unaccounted exons |           | # Genes found |           | score          | p-value           |
|-----|----------|-----------|-------------------|-----------|--------|---------------------|-----------|---------------|-----------|----------------|-------------------|
|     | n402     | CBS513.88 | n402              | CBS513.88 |        | n402                | CBS513.88 | n402          | CBS513.88 |                |                   |
| 78  | 10       | 2         | 2420928           | 85010     | 136    | 2378                | 24        | 33            | 30        | -1642.60029897 | 4.61963800547e-13 |
| 79  | 10       | 2         | 46211             | 2696397   | 43     | 2                   | 2937      | 12            | 13        | -2185.09396235 | 0.261             |
| 80  | 10       | 2         | 33651             | 2334420   | 76     | 6                   | 2435      | 11            | 13        | -1753.20070835 | 0.0105            |
| 81  | 10       | 3         | 33651             | 10672     | 8      | 40                  | 13        | 3             | 3         | -36.7532042612 | 0.624             |
| 82  | 10       | 7         | 46211             | 31166     | 6      | 0                   | 10        | 3             | 3         | -3.88121275217 | 0.559             |
| 83  | 10       | 8         | 74661             | 82034     | 4      | 71                  | 78        | 3             | 3         | -109.574091262 | 0.321             |
| 84  | 10       | 9         | 107473            | 156995    | 15     | 102                 | 125       | 5             | 7         | -169.897293485 | 0.825113373673    |
| 85  | 10       | 16        | 155559            | 114451    | 10     | 127                 | 155       | 5             | 5         | -184.113999448 | 0.000264410364886 |
| 86  | 11       | 19        | 80152             | 79401     | 105    | 14                  | 29        | 29            | 29        | 178.088361579  | 0.0               |
| 87  | 12       | 2         | 2610745           | 39112     | 14     | 219                 | 43        | 21            | 19        | -204.652444282 | 0.949988271788    |
| 88  | 12       | 2         | 67594             | 39112     | 7      | 12                  | 47        | 4             | 4         | -41.3952609567 | 0.617             |
| 89  | 12       | 10        | 242185            | 247968    | 181    | 44                  | 70        | 58            | 57        | 243.157671353  | 0.0               |
| 90  | 12       | 11        | 38726             | 41870     | 9      | 30                  | 43        | 3             | 3         | -51.1240590413 | 0.621             |
| 91  | 12       | 17        | 1438867           | 1698703   | 538    | 97                  | 131       | 67            | 67        | 871.724317716  | 0.0               |
| 92  | 12       | 17        | 598451            | 585921    | 607    | 104                 | 142       | 170           | 172       | 981.392251167  | 0.0               |
| 93  | 12       | 17        | 142745            | 156276    | 137    | 17                  | 36        | 42            | 43        | 231.098655077  | 0.0               |
| 94  | 13       | 3         | 72626             | 64175     | 4      | 63                  | 50        | 3             | 3         | -76.7643638976 | 0.034             |
| 95  | 13       | 14        | 43800             | 56166     | 4      | 16                  | 5         | 4             | 4         | -13.5268962651 | 0.499             |
| 96  | 13       | 15        | 174756            | 244131    | 44     | 194                 | 256       | 8             | 10        | -328.671887343 | 0.926740287964    |
| 97  | 13       | 16        | 1436152           | 1127798   | 1194   | 257                 | 315       | 85            | 86        | 1797.2743536   | 0.0               |
| 98  | 13       | 16        | 349153            | 338630    | 208    | 53                  | 165       | 25            | 27        | 261.305930066  | 0.0               |
| 99  | 13       | 16        | 1739812           | 1451711   | 1804   | 302                 | 425       | 431           | 431       | 2492.64564184  | 0.0               |
| 100 | 13       | 16        | 1072565           | 116132    | 133    | 612                 | 32        | 34            | 31        | -239.564082211 | 0.0               |
| 101 | 14       | 3         | 48556             | 61359     | 12     | 49                  | 50        | 3             | 3         | -69.440042699  | 0.628525531865    |
| 102 | 14       | 13        | 80214             | 57176     | 9      | 97                  | 71        | 3             | 3         | -126.017013265 | 0.704             |
| 103 | 14       | 14        | 57936             | 60995     | 6      | 1                   | 12        | 4             | 4         | -1.63156204986 | 0.029             |
| 104 | 14       | 16        | 659239            | 643535    | 585    | 138                 | 173       | 185           | 184       | 925.131256928  | 0.0               |
| 105 | 15       | 1         | 651901            | 29007     | 11     | 302                 | 38        | 13            | 12        | -252.787775088 | 0.274940035005    |
| 106 | 15       | 1         | 72285             | 86375     | 10     | 78                  | 62        | 4             | 5         | -109.311825151 | 0.95              |
| 107 | 15       | 1         | 34717             | 29007     | 5      | 50                  | 42        | 3             | 3         | -65.6813074666 | 0.308             |
| 108 | 15       | 3         | 1582234           | 1609797   | 2279   | 291                 | 381       | 443           | 450       | 2926.17184562  | 0.0               |
| 109 | 15       | 3         | 349153            | 64175     | 28     | 210                 | 13        | 14            | 14        | -120.04137005  | 4.02785071962e-08 |
| 110 | 15       | 3         | 873971            | 66971     | 71     | 868                 | 21        | 22            | 19        | -570.89724416  | 6.12938255706e-10 |
| 111 | 15       | 3         | 220428            | 61359     | 60     | 230                 | 7         | 24            | 21        | -82.4703175703 | 0.000264410364886 |
| 112 | 15       | 10        | 74159             | 60119     | 10     | 62                  | 45        | 4             | 4         | -78.6683871179 | 0.74              |
| 113 | 15       | 11        | 111178            | 92902     | 12     | 96                  | 63        | 6             | 6         | -124.990757075 | 0.978006636153    |
| 114 | 15       | 11        | 24076             | 41870     | 10     | 21                  | 45        | 3             | 3         | -49.5224391831 | 0.961             |
| 115 | 15       | 11        | 40339             | 55264     | 11     | 34                  | 49        | 3             | 3         | -58.1477432358 | 0.683440162805    |
| 116 | 15       | 15        | 109196            | 104980    | 14     | 105                 | 123       | 6             | 6         | -186.350385969 | 0.999645303392    |
| 117 | 15       | 15        | 32273             | 36957     | 9      | 35                  | 31        | 3             | 3         | -52.5812773937 | 0.991             |
| 118 | 15       | 15        | 76964             | 71372     | 6      | 70                  | 74        | 3             | 3         | -107.074067092 | 0.52              |
| 119 | 15       | 18        | 101513            | 57354     | 11     | 46                  | 69        | 3             | 3         | -81.207517521  | 0.540812172967    |
| 120 | 16       | 1         | 41638             | 28654     | 2      | 0                   | 3         | 3             | 3         | -1.98077737425 | 0.796             |
| 121 | 16       | 3         | 108178            | 129692    | 10     | 80                  | 166       | 6             | 6         | -187.637142984 | 0.859             |
| 122 | 16       | 4         | 1902589           | 1889324   | 1866   | 329                 | 425       | 577           | 573       | 2778.92124337  | 0.0               |
| 123 | 16       | 4         | 108178            | 272247    | 86     | 17                  | 72        | 32            | 36        | 115.501104484  | 0.0               |
| 124 | 16       | 4         | 245728            | 252505    | 191    | 51                  | 70        | 56            | 56        | 301.382746699  | 0.0               |
| 125 | 16       | 4         | 275854            | 59597     | 49     | 11                  | 8         | 24            | 22        | 79.1884302983  | 0.000264410364886 |
| 126 | 16       | 12        | 36855             | 16469     | 1      | 0                   | 0         | 3             | 3         | 0.0            | 1.0               |
| 127 | 17       | 4         | 365565            | 350147    | 345    | 57                  | 74        | 99            | 98        | 588.165393288  | 0.0               |
| 128 | 17       | 4         | 74403             | 44617     | 61     | 5                   | 11        | 18            | 15        | 93.5929726386  | 0.000264410364886 |
| 129 | 17       | 13        | 58014             | 64923     | 4      | 66                  | 87        | 3             | 3         | -115.97871768  | 0.611             |
| 130 | 18       | 4         | 148863            | 163819    | 110    | 45                  | 88        | 39            | 39        | 151.747986508  | 0.0               |
| 131 | 18       | 11        | 50357             | 55431     | 7      | 41                  | 58        | 3             | 3         | -70.9443088093 | 0.45              |
| 132 | 19       | 2         | 67233             | 98200     | 8      | 64                  | 94        | 4             | 4         | -119.745579968 | 0.787             |

Continued on next page

Table ST-6 – continued from previous page

| #   | Scaffold |           | Cluster size (bp) |           | # Hits | # Unaccounted exons |           | # Genes found |           | score          | p-value           |
|-----|----------|-----------|-------------------|-----------|--------|---------------------|-----------|---------------|-----------|----------------|-------------------|
|     | n402     | CBS513.88 | n402              | CBS513.88 |        | n402                | CBS513.88 | n402          | CBS513.88 |                |                   |
| 133 | 19       | 2         | 83773             | 76217     | 14     | 89                  | 61        | 3             | 3         | -104.447156249 | 0.365195523642    |
| 134 | 19       | 3         | 55215             | 40989     | 11     | 46                  | 47        | 3             | 3         | -66.1470588214 | 0.689423917628    |
| 135 | 19       | 3         | 86013             | 54099     | 11     | 70                  | 75        | 3             | 3         | -116.206480759 | 0.992989395014    |
| 136 | 19       | 6         | 122659            | 121076    | 7      | 100                 | 102       | 4             | 4         | -159.474380672 | 0.951             |
| 137 | 19       | 7         | 23716             | 71910     | 3      | 24                  | 68        | 3             | 3         | -70.4456016242 | 0.719             |
| 138 | 19       | 9         | 193259            | 207577    | 23     | 151                 | 198       | 6             | 8         | -236.777086736 | 0.0206579416051   |
| 139 | 19       | 10        | 122563            | 42190     | 6      | 49                  | 16        | 4             | 4         | -46.7193748661 | 0.544             |
| 140 | 19       | 10        | 39676             | 25143     | 7      | 25                  | 15        | 3             | 3         | -19.0263100901 | 0.016             |
| 141 | 19       | 11        | 2747326           | 2719184   | 4306   | 463                 | 595       | 730           | 735       | 4991.51095872  | 0.0               |
| 142 | 19       | 11        | 122563            | 1014767   | 148    | 16                  | 1023      | 21            | 23        | -614.493781771 | 2.03144888133e-07 |
| 143 | 19       | 11        | 106279            | 1383921   | 175    | 26                  | 1383      | 24            | 28        | -835.610331223 | 2.01116900911e-12 |
| 144 | 19       | 11        | 637345            | 152586    | 220    | 418                 | 40        | 37            | 33        | -15.9630149652 | 0.0               |
| 145 | 19       | 11        | 635229            | 571850    | 603    | 145                 | 144       | 59            | 57        | 860.487291748  | 0.0               |
| 146 | 19       | 11        | 99117             | 41870     | 47     | 31                  | 12        | 13            | 11        | 54.0894134433  | 0.0               |
| 147 | 19       | 11        | 1191020           | 33365     | 54     | 847                 | 13        | 15            | 12        | -581.160555461 | 3.16288483337e-06 |
| 148 | 19       | 11        | 1191020           | 1159085   | 1469   | 242                 | 308       | 26            | 26        | 1822.72101156  | 0.0               |
| 149 | 19       | 11        | 15280             | 741987    | 37     | 4                   | 625       | 4             | 6         | -430.91204616  | 0.028             |
| 150 | 19       | 11        | 1079012           | 41870     | 63     | 1064                | 10        | 13            | 10        | -759.861281462 | 0.00396720444327  |
| 151 | 19       | 11        | 999190            | 53383     | 73     | 989                 | 14        | 17            | 14        | -682.690409999 | 4.53390488347e-05 |
| 152 | 19       | 11        | 86013             | 602413    | 132    | 8                   | 531       | 17            | 19        | -217.856605154 | 0.000264410364886 |
| 153 | 19       | 15        | 20917             | 308984    | 7      | 17                  | 256       | 5             | 8         | -216.164588402 | 0.989             |
| 154 | 19       | 15        | 20917             | 28362     | 3      | 17                  | 32        | 3             | 3         | -36.8425233599 | 0.693             |
| 155 | 19       | 16        | 30793             | 1310325   | 38     | 17                  | 1451      | 6             | 9         | -1085.34595811 | 0.468134374943    |
| 156 | 19       | 16        | 30793             | 7477      | 4      | 25                  | 3         | 3             | 3         | -17.2601044761 | 0.205             |
| 157 | 19       | 17        | 108812            | 63525     | 5      | 108                 | 66        | 6             | 6         | -140.051416505 | 0.972             |
| 158 | 19       | 18        | 17176             | 35243     | 5      | 14                  | 30        | 3             | 3         | -28.7576128375 | 0.302             |
| 159 | 20       | 2         | 87750             | 85010     | 17     | 91                  | 106       | 4             | 5         | -144.423493849 | 0.782939638573    |
| 160 | 20       | 7         | 51106             | 27259     | 4      | 60                  | 22        | 3             | 3         | -65.0623551856 | 0.879             |
| 161 | 20       | 11        | 43795             | 33365     | 4      | 34                  | 45        | 3             | 3         | -50.8707742306 | 0.021             |
| 162 | 20       | 12        | 16620             | 7847      | 2      | 18                  | 3         | 3             | 3         | -10.7060037932 | 0.012             |
| 163 | 20       | 12        | 14546             | 27090     | 3      | 13                  | 24        | 3             | 3         | -23.9614289584 | 0.172             |
| 164 | 20       | 14        | 561647            | 29571     | 8      | 48                  | 32        | 11            | 9         | -49.4863429883 | 0.037             |
| 165 | 20       | 14        | 90929             | 36050     | 9      | 48                  | 40        | 5             | 5         | -55.0794817922 | 0.056             |
| 166 | 20       | 18        | 2420928           | 2326117   | 1591   | 315                 | 418       | 54            | 56        | 2315.23237577  | 0.0               |
| 167 | 20       | 18        | 1582788           | 1540116   | 1800   | 325                 | 444       | 475           | 481       | 2575.27793658  | 0.0               |
| 168 | 20       | 18        | 1439993           | 149236    | 202    | 1341                | 68        | 51            | 48        | -716.196780896 | 0.0               |
| 169 | 20       | 18        | 14546             | 1086603   | 13     | 3                   | 270       | 7             | 9         | -178.928468257 | 0.00264410364886  |
| 170 | 20       | 18        | 4647              | 791352    | 17     | 0                   | 336       | 3             | 6         | -222.669128035 | 0.00317376355462  |
| 171 | 20       | 18        | 3033489           | 57354     | 96     | 1406                | 23        | 18            | 16        | -974.35381353  | 3.86867596958e-07 |
| 172 | 20       | 18        | 3033489           | 57354     | 96     | 1406                | 23        | 21            | 16        | -974.35381353  | 3.86867596958e-07 |
| 173 | 20       | 18        | 3126376           | 80006     | 158    | 1408                | 24        | 19            | 18        | -872.90308028  | 0.0               |
| 174 | 20       | 18        | 3126376           | 500880    | 709    | 1078                | 164       | 36            | 36        | 221.816195957  | 0.0               |
| 175 | 21       | 6         | 447034            | 448492    | 316    | 98                  | 146       | 104           | 105       | 481.747917395  | 0.0               |
| 176 | 21       | 6         | 192210            | 192983    | 184    | 22                  | 52        | 47            | 46        | 281.08956916   | 0.0               |
| 177 | 21       | 8         | 2577223           | 2562760   | 3195   | 501                 | 628       | 744           | 748       | 4177.90602352  | 0.0               |
| 178 | 21       | 8         | 15559             | 627419    | 16     | 0                   | 0         | 6             | 8         | 31.1459459459  | 0.000264410364886 |
| 179 | 21       | 8         | 642715            | 627419    | 641    | 134                 | 152       | 10            | 9         | 986.722393083  | 0.0               |
| 180 | 21       | 8         | 33121             | 645798    | 34     | 3                   | 571       | 10            | 11        | -374.708522051 | 0.000528820729773 |
| 181 | 21       | 8         | 27280             | 878049    | 13     | 1                   | 904       | 5             | 7         | -622.751032395 | 0.000264410364886 |
| 182 | 21       | 8         | 73895             | 77579     | 68     | 23                  | 28        | 26            | 26        | 116.712704602  | 0.0               |
| 183 | 21       | 11        | 33121             | 54484     | 7      | 6                   | 11        | 3             | 3         | -8.09919733555 | 0.439             |
| 184 | 21       | 14        | 15559             | 20288     | 10     | 12                  | 13        | 3             | 3         | -11.9966543227 | 0.415             |
| 185 | 21       | 15        | 27280             | 55212     | 6      | 8                   | 50        | 3             | 3         | -43.5600059026 | 0.854             |
| 186 | 21       | 18        | 67890             | 57354     | 18     | 50                  | 65        | 4             | 3         | -68.616380808  | 0.0607489944309   |
| 187 | 21       | 18        | 66851             | 80006     | 26     | 42                  | 91        | 3             | 3         | -86.6401588439 | 0.675160315019    |

Continued on next page

Table ST-6 – continued from previous page

| #   | Scaffold |           | Cluster size (bp) |           | # Hits | # Unaccounted exons |           | # Genes found |           | score         | p-value           |
|-----|----------|-----------|-------------------|-----------|--------|---------------------|-----------|---------------|-----------|---------------|-------------------|
|     | n402     | CBS513.88 | n402              | CBS513.88 |        | n402                | CBS513.88 | n402          | CBS513.88 |               |                   |
| 188 | 22       | 4         | 40194             | 39784     | 46     | 9                   | 19        | 13            | 13        | 79.0950613153 | 0.000264410364886 |
| 189 | 24       | 4         | 13463             | 13464     | 17     | 1                   | 5         | 7             | 7         | 32.3207320898 | 0.000264410364886 |

Table ST-7: Clusters discovered by *i-ADHoRe* for the basidiomycota

| #  | Scaffold        |                 | Cluster size (bp) |                 | # Hits | # Unaccounted exons |                 | # Genes found   |                 | score     | p-value           |
|----|-----------------|-----------------|-------------------|-----------------|--------|---------------------|-----------------|-----------------|-----------------|-----------|-------------------|
|    | <i>S. comm.</i> | <i>A. bisp.</i> | <i>S. comm.</i>   | <i>A. bisp.</i> |        | <i>S. comm.</i>     | <i>A. bisp.</i> | <i>S. comm.</i> | <i>A. bisp.</i> |           |                   |
| 1  | 1               | 1               | 570117            | 461443          | 658    | 604                 | 421             | 99              | 90              | 223.407   | 0.0               |
| 2  | 1               | 1               | 691402            | 726715          | 846    | 802                 | 921             | 105             | 104             | -46.893   | 0.0               |
| 3  | 1               | 1               | 115804            | 620239          | 210    | 77                  | 1240            | 32              | 33              | -640.172  | 9.65041380141e-11 |
| 4  | 1               | 1               | 646260            | 164889          | 246    | 1120                | 175             | 22              | 20              | -550.315  | 5.6829946804e-07  |
| 5  | 1               | 1               | 560811            | 1567687         | 1062   | 451                 | 2754            | 25              | 28              | -1088.401 | 0.0               |
| 6  | 1               | 1               | 510889            | 1504479         | 854    | 461                 | 2705            | 17              | 20              | -1289.840 | 0.0               |
| 7  | 1               | 1               | 557784            | 1676526         | 1243   | 311                 | 2813            | 26              | 29              | -732.331  | 0.0               |
| 8  | 1               | 1               | 646260            | 248994          | 301    | 1074                | 275             | 23              | 22              | -522.306  | 4.31686908442e-11 |
| 9  | 1               | 1               | 4119660           | 233324          | 766    | 7522                | 89              | 32              | 26              | -4533.262 | 1.0               |
| 10 | 1               | 1               | 3975004           | 1451285         | 3742   | 5500                | 1241            | 53              | 50              | -1042.519 | 0.0               |
| 11 | 1               | 1               | 3975004           | 1445296         | 3714   | 5511                | 1239            | 55              | 47              | -1073.331 | 0.0               |
| 12 | 1               | 1               | 3953332           | 2101032         | 4545   | 5071                | 1965            | 53              | 45              | -702.302  | 0.0               |
| 13 | 1               | 1               | 5545334           | 1358359         | 4776   | 7506                | 749             | 36              | 31              | -820.306  | 0.0               |
| 14 | 1               | 1               | 646260            | 1281143         | 995    | 610                 | 2149            | 28              | 25              | -734.872  | 0.0               |
| 15 | 1               | 1               | 4194992           | 279927          | 526    | 7724                | 329             | 32              | 30              | -5048.027 | 1.0               |
| 16 | 1               | 1               | 4183744           | 1309130         | 2013   | 6755                | 1373            | 41              | 43              | -4054.845 | 1.0               |
| 17 | 1               | 1               | 524142            | 1265248         | 880    | 515                 | 1906            | 40              | 46              | -578.480  | 0.0               |
| 18 | 1               | 1               | 3131485           | 1460833         | 2078   | 4835                | 1580            | 67              | 75              | -2653.702 | 0.627412159127    |
| 19 | 1               | 1               | 1640897           | 1152231         | 1235   | 2416                | 1547            | 31              | 31              | -1469.495 | 4.03121980241e-13 |
| 20 | 1               | 1               | 1478576           | 1017407         | 1793   | 1654                | 909             | 23              | 22              | 488.086   | 0.0               |
| 21 | 1               | 1               | 4072845           | 111840          | 221    | 7703                | 109             | 27              | 26              | -5244.665 | 1.0               |
| 22 | 1               | 1               | 4117755           | 449153          | 977    | 7296                | 460             | 30              | 33              | -4556.683 | 1.0               |
| 23 | 1               | 1               | 4070002           | 1010170         | 2501   | 6285                | 923             | 27              | 31              | -2548.595 | 8.35929359067e-09 |
| 24 | 1               | 1               | 4038683           | 924254          | 2129   | 6417                | 866             | 36              | 32              | -2917.655 | 0.000116418478754 |
| 25 | 1               | 1               | 4117755           | 990407          | 2417   | 6371                | 1003            | 29              | 32              | -2779.038 | 2.66200046105e-05 |
| 26 | 1               | 1               | 4117755           | 941527          | 2200   | 6498                | 970             | 59              | 55              | -3067.597 | 0.0292757927048   |
| 27 | 1               | 1               | 4043113           | 285781          | 466    | 7555                | 349             | 31              | 36              | -5159.187 | 1.0               |
| 28 | 1               | 1               | 404035            | 162964          | 394    | 433                 | 22              | 62              | 59              | 330.986   | 0.0               |
| 29 | 1               | 1               | 59100             | 2736376         | 60     | 70                  | 5336            | 6               | 6               | -3967.363 | 1.0               |
| 30 | 1               | 1               | 719026            | 842742          | 989    | 644                 | 952             | 139             | 134             | 230.697   | 0.0               |
| 31 | 1               | 1               | 484454            | 283530          | 478    | 653                 | 282             | 67              | 68              | 108.425   | 0.0               |
| 32 | 1               | 1               | 219938            | 205350          | 217    | 209                 | 224             | 38              | 39              | 52.839    | 0.0               |
| 33 | 1               | 1               | 534006            | 371801          | 671    | 582                 | 374             | 73              | 69              | 291.364   | 0.0               |
| 34 | 1               | 1               | 738868            | 798071          | 1011   | 685                 | 861             | 140             | 136             | 288.009   | 0.0               |
| 35 | 1               | 1               | 442699            | 660116          | 673    | 479                 | 1029            | 66              | 67              | -182.191  | 0.0               |
| 36 | 1               | 1               | 409870            | 849004          | 153    | 752                 | 1768            | 28              | 30              | -1778.963 | 1.0               |
| 37 | 1               | 1               | 115036            | 90349           | 127    | 133                 | 83              | 22              | 21              | 54.003    | 0.0               |
| 38 | 1               | 1               | 218813            | 141498          | 237    | 244                 | 74              | 36              | 35              | 163.624   | 0.0               |
| 39 | 1               | 1               | 326120            | 92519           | 193    | 441                 | 14              | 32              | 32              | 22.103    | 0.0               |
| 40 | 1               | 1               | 316877            | 1148759         | 361    | 339                 | 2241            | 30              | 33              | -1440.546 | 0.0835338996234   |
| 41 | 1               | 1               | 546745            | 618194          | 558    | 690                 | 1015            | 57              | 55              | -515.222  | 0.0               |
| 42 | 1               | 1               | 110956            | 79833           | 103    | 152                 | 29              | 11              | 11              | 55.753    | 0.0               |
| 43 | 1               | 1               | 145614            | 154218          | 200    | 171                 | 266             | 11              | 10              | -76.077   | 2.2400636901e-11  |
| 44 | 1               | 1               | 325181            | 219365          | 183    | 532                 | 402             | 34              | 33              | -386.422  | 1.03553643438e-09 |
| 45 | 1               | 1               | 172878            | 209692          | 125    | 194                 | 346             | 17              | 17              | -214.074  | 4.68116123642e-07 |
| 46 | 1               | 1               | 205410            | 82010           | 117    | 240                 | 114             | 11              | 11              | -69.949   | 4.66293670343e-15 |

Continued on next page

Table ST-7 – continued from previous page

| #   | Scaffold        |                 | Cluster size (bp) |                 | # Hits | # Unaccounted exons |                 | # Genes found   |                 | score     | p-value           |
|-----|-----------------|-----------------|-------------------|-----------------|--------|---------------------|-----------------|-----------------|-----------------|-----------|-------------------|
|     | <i>S. comm.</i> | <i>A. bisp.</i> | <i>S. comm.</i>   | <i>A. bisp.</i> |        | <i>S. comm.</i>     | <i>A. bisp.</i> | <i>S. comm.</i> | <i>A. bisp.</i> |           |                   |
| 47  | 1               | 1               | 197568            | 291470          | 41     | 379                 | 372             | 9               | 9               | -490.287  | 0.999935144932    |
| 48  | 1               | 1               | 9561              | 16585           | 31     | 4                   | 15              | 4               | 4               | 38.976    | 8.72448089339e-05 |
| 49  | 1               | 1               | 42490             | 36591           | 21     | 68                  | 64              | 4               | 4               | -60.057   | 0.0242626906702   |
| 50  | 1               | 1               | 73220             | 57393           | 15     | 22                  | 1               | 4               | 4               | 10.422    | 8.72448089339e-05 |
| 51  | 1               | 1               | 82180             | 42073           | 42     | 116                 | 12              | 6               | 6               | -28.877   | 9.80745139975e-05 |
| 52  | 1               | 1               | 34878             | 59996           | 48     | 30                  | 100             | 6               | 6               | -19.501   | 3.6041845064e-09  |
| 53  | 1               | 1               | 15422             | 128432          | 26     | 8                   | 165             | 5               | 5               | -66.459   | 8.72448089339e-05 |
| 54  | 1               | 1               | 14422             | 12468           | 29     | 9                   | 1               | 3               | 3               | 39.124    | 8.72448089339e-05 |
| 55  | 1               | 1               | 3757              | 3056            | 8      | 2                   | 0               | 3               | 3               | 13.490    | 8.72448089339e-05 |
| 56  | 1               | 1               | 10570             | 9653            | 21     | 2                   | 1               | 3               | 3               | 33.395    | 8.72448089339e-05 |
| 57  | 1               | 1               | 9802              | 5787            | 9      | 6                   | 9               | 3               | 3               | 3.494     | 0.001875          |
| 58  | 1               | 1               | 29731             | 28207           | 62     | 14                  | 5               | 6               | 6               | 89.359    | 8.72448089339e-05 |
| 59  | 1               | 1               | 41862             | 32420           | 11     | 38                  | 50              | 3               | 3               | -38.912   | 0.00533006069565  |
| 60  | 1               | 1               | 41607             | 49015           | 48     | 52                  | 88              | 4               | 4               | -28.363   | 2.07067941793e-07 |
| 61  | 1               | 1               | 28609             | 36614           | 22     | 52                  | 69              | 4               | 4               | -52.712   | 0.0171349460372   |
| 62  | 1               | 1               | 57620             | 72072           | 3      | 131                 | 101             | 3               | 3               | -172.654  | 1.0               |
| 63  | 1               | 1               | 58012             | 86252           | 30     | 96                  | 191             | 3               | 3               | -185.029  | 0.996606351223    |
| 64  | 1               | 2               | 483782            | 798458          | 105    | 921                 | 1345            | 26              | 27              | -1525.102 | 1.0               |
| 65  | 1               | 2               | 122146            | 432093          | 19     | 247                 | 696             | 7               | 7               | -646.793  | 0.999981479889    |
| 66  | 1               | 3               | 100091            | 853733          | 22     | 114                 | 1486            | 8               | 9               | -1072.672 | 0.970093758889    |
| 67  | 1               | 3               | 537808            | 792170          | 151    | 1068                | 1214            | 23              | 26              | -1399.551 | 0.99215540107     |
| 68  | 1               | 3               | 424625            | 623194          | 76     | 809                 | 887             | 21              | 21              | -1115.702 | 0.999999982361    |
| 69  | 1               | 3               | 343027            | 504890          | 70     | 443                 | 720             | 12              | 12              | -649.436  | 5.95404830844e-05 |
| 70  | 1               | 3               | 41296             | 24404           | 1      | 0                   | 0               | 3               | 3               | 0.000     | 1.0               |
| 71  | 1               | 4               | 1048449           | 1691605         | 1317   | 1188                | 2476            | 156             | 172             | -1011.697 | 0.0               |
| 72  | 1               | 4               | 331057            | 229463          | 505    | 279                 | 107             | 67              | 67              | 536.533   | 0.0               |
| 73  | 1               | 4               | 149207            | 1186238         | 272    | 83                  | 2038            | 27              | 28              | -1182.127 | 0.0019820711713   |
| 74  | 1               | 4               | 13401             | 256769          | 23     | 2                   | 554             | 4               | 7               | -393.834  | 1.0               |
| 75  | 1               | 4               | 33253             | 272222          | 36     | 32                  | 565             | 6               | 8               | -401.674  | 0.998621730801    |
| 76  | 1               | 4               | 377008            | 241012          | 346    | 252                 | 167             | 50              | 48              | 313.322   | 0.0               |
| 77  | 1               | 4               | 75659             | 126408          | 60     | 85                  | 211             | 10              | 10              | -123.001  | 5.04311508738e-05 |
| 78  | 1               | 4               | 466479            | 493782          | 586    | 402                 | 638             | 69              | 73              | 151.805   | 0.0               |
| 79  | 1               | 4               | 971088            | 79452           | 89     | 1725                | 112             | 12              | 11              | -1193.698 | 1.0               |
| 80  | 1               | 4               | 362003            | 718189          | 382    | 365                 | 885             | 63              | 66              | -283.766  | 0.0               |
| 81  | 1               | 4               | 335962            | 206714          | 354    | 261                 | 230             | 43              | 43              | 199.490   | 0.0               |
| 82  | 1               | 4               | 128655            | 66907           | 123    | 152                 | 45              | 19              | 18              | 43.984    | 0.0               |
| 83  | 1               | 4               | 209814            | 192628          | 253    | 227                 | 195             | 30              | 29              | 84.713    | 0.0               |
| 84  | 1               | 4               | 184268            | 124088          | 166    | 282                 | 170             | 19              | 19              | -55.016   | 0.0               |
| 85  | 1               | 4               | 560026            | 798316          | 579    | 519                 | 840             | 93              | 96              | -58.899   | 0.0               |
| 86  | 1               | 4               | 79958             | 88743           | 71     | 83                  | 125             | 13              | 13              | -33.094   | 1.01141317543e-13 |
| 87  | 1               | 4               | 391439            | 260338          | 178    | 640                 | 387             | 23              | 23              | -426.625  | 1.00586206031e-12 |
| 88  | 1               | 4               | 145457            | 257889          | 62     | 232                 | 221             | 13              | 14              | -210.764  | 4.19746978707e-05 |
| 89  | 1               | 4               | 219134            | 248098          | 25     | 458                 | 546             | 10              | 8               | -730.278  | 1.0               |
| 90  | 1               | 4               | 183912            | 348478          | 203    | 163                 | 272             | 36              | 35              | 73.293    | 0.0               |
| 91  | 1               | 4               | 50703             | 36430           | 40     | 66                  | 29              | 7               | 7               | 11.477    | 0.0               |
| 92  | 1               | 4               | 141776            | 135800          | 133    | 121                 | 149             | 24              | 24              | 16.033    | 0.0               |
| 93  | 1               | 4               | 70031             | 20488           | 20     | 131                 | 20              | 6               | 5               | -73.293   | 0.140756026853    |
| 94  | 1               | 4               | 10067             | 7707            | 13     | 1                   | 3               | 4               | 4               | 18.766    | 8.72448089339e-05 |
| 95  | 1               | 4               | 29633             | 16401           | 34     | 10                  | 0               | 6               | 6               | 54.757    | 8.72448089339e-05 |
| 96  | 1               | 4               | 41940             | 71640           | 16     | 41                  | 115             | 5               | 6               | -87.791   | 0.256500067702    |
| 97  | 1               | 4               | 103510            | 68544           | 76     | 69                  | 65              | 15              | 15              | 31.918    | 0.0               |
| 98  | 1               | 4               | 16636             | 22042           | 40     | 0                   | 20              | 3               | 3               | 46.729    | 8.72448089339e-05 |
| 99  | 1               | 4               | 23924             | 20775           | 14     | 17                  | 29              | 3               | 3               | -9.381    | 0.000485721130788 |
| 100 | 1               | 4               | 32349             | 15525           | 8      | 60                  | 12              | 3               | 3               | -34.726   | 0.138             |
| 101 | 1               | 4               | 14233             | 31771           | 58     | 1                   | 48              | 3               | 3               | 54.222    | 8.72448089339e-05 |

Continued on next page

Table ST-7 – continued from previous page

| #   | Scaffold |          | Cluster size (bp) |          | # Hits | # Unaccounted exons |          | # Genes found |          | score     | p-value           |
|-----|----------|----------|-------------------|----------|--------|---------------------|----------|---------------|----------|-----------|-------------------|
|     | S. comm. | A. bisp. | S. comm.          | A. bisp. |        | S. comm.            | A. bisp. | S. comm.      | A. bisp. |           |                   |
| 102 | 1        | 4        | 49858             | 52432    | 7      | 101                 | 109      | 3             | 3        | -146.658  | 1.0               |
| 103 | 1        | 4        | 42136             | 24150    | 21     | 83                  | 18       | 3             | 3        | -44.661   | 0.212944993201    |
| 104 | 1        | 4        | 36315             | 107800   | 56     | 48                  | 101      | 3             | 4        | 1.074     | 0.0               |
| 105 | 1        | 4        | 123090            | 132672   | 16     | 31                  | 323      | 3             | 3        | -248.296  | 0.999678812093    |
| 106 | 1        | 5        | 73785             | 77274    | 4      | 124                 | 106      | 3             | 3        | -152.435  | 0.964             |
| 107 | 1        | 6        | 667117            | 1055630  | 312    | 1098                | 1853     | 37            | 47       | -1858.534 | 1.0               |
| 108 | 1        | 6        | 1580851           | 550984   | 318    | 2721                | 924      | 26            | 25       | -2372.979 | 1.0               |
| 109 | 1        | 6        | 677044            | 945775   | 246    | 1147                | 1363     | 40            | 45       | -1549.680 | 0.999999924758    |
| 110 | 1        | 6        | 424895            | 863589   | 125    | 869                 | 1457     | 26            | 29       | -1544.997 | 0.999999999999    |
| 111 | 1        | 6        | 85874             | 177157   | 45     | 155                 | 250      | 5             | 6        | -233.460  | 0.606885215407    |
| 112 | 1        | 7        | 118541            | 161086   | 22     | 227                 | 263      | 4             | 4        | -284.701  | 0.0705307761644   |
| 113 | 1        | 7        | 8877              | 12935    | 6      | 8                   | 9        | 3             | 3        | 0.748     | 0.000348979235736 |
| 114 | 1        | 8        | 377756            | 617201   | 78     | 678                 | 897      | 17            | 19       | -968.394  | 0.812181216371    |
| 115 | 1        | 10       | 1392390           | 158188   | 51     | 2523                | 287      | 13            | 10       | -1938.649 | 1.0               |
| 116 | 1        | 10       | 70012             | 98464    | 6      | 47                  | 27       | 4             | 4        | -35.202   | 0.022             |
| 117 | 1        | 11       | 114314            | 931212   | 33     | 239                 | 978      | 8             | 10       | -740.185  | 0.0041273152463   |
| 118 | 1        | 11       | 181342            | 312624   | 43     | 360                 | 458      | 6             | 6        | -509.080  | 0.91487269573     |
| 119 | 1        | 12       | 93559             | 953580   | 99     | 163                 | 984      | 16            | 16       | -629.777  | 2.92097927168e-06 |
| 120 | 1        | 13       | 148854            | 338786   | 15     | 315                 | 506      | 7             | 8        | -530.324  | 0.904369579456    |
| 121 | 1        | 14       | 430944            | 1434574  | 96     | 836                 | 1321     | 24            | 31       | -1454.247 | 1.0               |
| 122 | 1        | 14       | 229560            | 262363   | 274    | 144                 | 207      | 38            | 38       | 200.458   | 0.0               |
| 123 | 1        | 14       | 239505            | 251092   | 172    | 313                 | 276      | 32            | 30       | -133.135  | 0.0               |
| 124 | 1        | 14       | 340959            | 353091   | 264    | 449                 | 320      | 46            | 47       | -133.218  | 0.0               |
| 125 | 1        | 14       | 437166            | 483488   | 246    | 629                 | 636      | 37            | 37       | -528.471  | 4.40869563079e-13 |
| 126 | 1        | 14       | 267269            | 259162   | 327    | 152                 | 180      | 43            | 43       | 339.407   | 0.0               |
| 127 | 1        | 14       | 130112            | 140846   | 62     | 19                  | 4        | 10            | 9        | 98.574    | 8.72448089339e-05 |
| 128 | 1        | 14       | 142998            | 202996   | 81     | 171                 | 245      | 11            | 10       | -131.863  | 0.0               |
| 129 | 1        | 14       | 228577            | 362653   | 31     | 440                 | 603      | 11            | 10       | -701.255  | 0.999997118242    |
| 130 | 1        | 14       | 24242             | 27332    | 60     | 15                  | 23       | 6             | 6        | 66.524    | 0.0               |
| 131 | 1        | 14       | 9407              | 8095     | 17     | 4                   | 3        | 4             | 4        | 22.911    | 8.72448089339e-05 |
| 132 | 1        | 14       | 104938            | 100456   | 40     | 141                 | 135      | 9             | 8        | -118.910  | 1.60686033743e-05 |
| 133 | 1        | 14       | 214735            | 217608   | 28     | 380                 | 265      | 5             | 5        | -440.400  | 0.999999975968    |
| 134 | 1        | 14       | 50188             | 68486    | 32     | 78                  | 73       | 4             | 4        | -46.275   | 2.62915171967e-07 |
| 135 | 1        | 14       | 79716             | 52990    | 3      | 25                  | 2        | 3             | 3        | -16.713   | 0.834             |
| 136 | 1        | 14       | 82498             | 33041    | 3      | 113                 | 57       | 3             | 3        | -126.047  | 1.0               |
| 137 | 1        | 17       | 83856             | 1491118  | 7      | 173                 | 542      | 15            | 17       | -462.493  | 0.555             |
| 138 | 2        | 1        | 523136            | 613833   | 109    | 801                 | 1294     | 18            | 20       | -1407.499 | 1.0               |
| 139 | 2        | 2        | 2177821           | 580800   | 940    | 3428                | 518      | 57            | 57       | -1729.707 | 0.00691971293762  |
| 140 | 2        | 2        | 2087983           | 1477679  | 2789   | 2086                | 1489     | 19            | 20       | 767.275   | 0.0               |
| 141 | 2        | 2        | 326473            | 197881   | 395    | 281                 | 117      | 52            | 52       | 376.295   | 0.0               |
| 142 | 2        | 2        | 1617853           | 105049   | 271    | 2782                | 51       | 32            | 30       | -1535.430 | 0.639040346683    |
| 143 | 2        | 2        | 665547            | 660448   | 521    | 734                 | 758      | 50            | 49       | -247.469  | 0.0               |
| 144 | 2        | 2        | 2358874           | 120682   | 264    | 4339                | 60       | 22            | 20       | -2661.863 | 1.0               |
| 145 | 2        | 2        | 174906            | 424487   | 195    | 136                 | 386      | 17            | 18       | -69.350   | 0.0               |
| 146 | 2        | 2        | 55610             | 2458374  | 42     | 47                  | 4481     | 7             | 7        | -3249.753 | 1.0               |
| 147 | 2        | 2        | 338598            | 449226   | 466    | 353                 | 637      | 48            | 47       | 8.140     | 0.0               |
| 148 | 2        | 2        | 1236909           | 259984   | 341    | 1829                | 349      | 21            | 21       | -1032.141 | 6.87738528146e-05 |
| 149 | 2        | 2        | 89167             | 638243   | 144    | 80                  | 1398     | 10            | 9        | -883.392  | 0.340525034921    |
| 150 | 2        | 2        | 799401            | 1093638  | 1365   | 526                 | 1199     | 124           | 124      | 697.318   | 0.0               |
| 151 | 2        | 2        | 367474            | 437738   | 392    | 311                 | 509      | 55            | 56       | 102.891   | 0.0               |
| 152 | 2        | 2        | 464469            | 659240   | 744    | 372                 | 637      | 61            | 65       | 473.021   | 0.0               |
| 153 | 2        | 2        | 299273            | 300861   | 363    | 238                 | 338      | 36            | 37       | 137.172   | 0.0               |
| 154 | 2        | 2        | 310795            | 423733   | 413    | 367                 | 670      | 51            | 51       | -71.339   | 0.0               |
| 155 | 2        | 2        | 227070            | 201382   | 295    | 196                 | 302      | 27            | 28       | 64.602    | 0.0               |
| 156 | 2        | 2        | 70456             | 199374   | 82     | 98                  | 404      | 11            | 12       | -243.374  | 0.00039931026254  |

Continued on next page



Table ST-7 – continued from previous page

| #   | Scaffold        |                 | Cluster size (bp) |                 | # Hits | # Unaccounted exons |                 | # Genes found   |                 | score     | p-value           |
|-----|-----------------|-----------------|-------------------|-----------------|--------|---------------------|-----------------|-----------------|-----------------|-----------|-------------------|
|     | <i>S. comm.</i> | <i>A. bisp.</i> | <i>S. comm.</i>   | <i>A. bisp.</i> |        | <i>S. comm.</i>     | <i>A. bisp.</i> | <i>S. comm.</i> | <i>A. bisp.</i> |           |                   |
| 157 | 2               | 2               | 228393            | 287450          | 355    | 145                 | 348             | 42              | 45              | 185.997   | 0.0               |
| 158 | 2               | 2               | 329544            | 165623          | 277    | 428                 | 146             | 27              | 26              | 12.749    | 0.0               |
| 159 | 2               | 2               | 226439            | 206556          | 228    | 212                 | 249             | 34              | 35              | 35.799    | 0.0               |
| 160 | 2               | 2               | 185276            | 262237          | 143    | 214                 | 469             | 16              | 16              | -239.685  | 0.0               |
| 161 | 2               | 2               | 92044             | 68441           | 101    | 92                  | 99              | 14              | 13              | 55.864    | 0.0               |
| 162 | 2               | 2               | 133765            | 88665           | 182    | 113                 | 85              | 20              | 20              | 112.313   | 0.0               |
| 163 | 2               | 2               | 165052            | 87861           | 170    | 139                 | 42              | 24              | 24              | 153.162   | 0.0               |
| 164 | 2               | 2               | 123554            | 134380          | 111    | 154                 | 192             | 15              | 15              | -79.039   | 4.34097202628e-14 |
| 165 | 2               | 2               | 151194            | 157244          | 123    | 234                 | 308             | 16              | 16              | -187.082  | 1.16018306073e-13 |
| 166 | 2               | 2               | 119659            | 131407          | 78     | 164                 | 196             | 14              | 14              | -135.453  | 3.42330400249e-07 |
| 167 | 2               | 2               | 98722             | 90185           | 110    | 146                 | 140             | 11              | 11              | -53.093   | 7.88520360118e-11 |
| 168 | 2               | 2               | 62993             | 133168          | 75     | 48                  | 221             | 16              | 17              | -59.373   | 0.0               |
| 169 | 2               | 2               | 86080             | 75600           | 74     | 68                  | 102             | 12              | 12              | 23.711    | 0.0               |
| 170 | 2               | 2               | 55374             | 83363           | 61     | 64                  | 149             | 11              | 11              | -57.766   | 5.33364574729e-09 |
| 171 | 2               | 2               | 67057             | 103493          | 66     | 52                  | 120             | 9               | 10              | -9.076    | 0.0               |
| 172 | 2               | 2               | 178810            | 115335          | 51     | 314                 | 241             | 6               | 6               | -278.059  | 4.13716831775e-05 |
| 173 | 2               | 2               | 173557            | 144609          | 100    | 157                 | 93              | 12              | 11              | 1.644     | 0.0               |
| 174 | 2               | 2               | 144050            | 146571          | 88     | 156                 | 121             | 12              | 12              | -9.815    | 0.0               |
| 175 | 2               | 2               | 51851             | 68186           | 61     | 68                  | 83              | 6               | 6               | -9.279    | 2.95874436063e-13 |
| 176 | 2               | 2               | 18538             | 46444           | 25     | 0                   | 21              | 4               | 4               | 19.518    | 8.72448089339e-05 |
| 177 | 2               | 2               | 122449            | 111937          | 41     | 195                 | 175             | 4               | 4               | -186.720  | 0.00517453671888  |
| 178 | 2               | 2               | 89366             | 54366           | 74     | 91                  | 89              | 10              | 10              | -6.120    | 1.11022302463e-16 |
| 179 | 2               | 2               | 85207             | 120366          | 21     | 136                 | 193             | 6               | 6               | -194.925  | 0.394059321361    |
| 180 | 2               | 2               | 235675            | 230305          | 54     | 330                 | 461             | 7               | 7               | -439.124  | 0.00232912231696  |
| 181 | 2               | 2               | 4941              | 4777            | 14     | 0                   | 0               | 3               | 3               | 24.265    | 8.72448089339e-05 |
| 182 | 2               | 2               | 19362             | 20057           | 31     | 11                  | 9               | 4               | 4               | 28.315    | 8.72448089339e-05 |
| 183 | 2               | 2               | 7241              | 7304            | 17     | 2                   | 0               | 3               | 3               | 31.574    | 8.72448089339e-05 |
| 184 | 2               | 2               | 11106             | 13751           | 30     | 2                   | 10              | 3               | 3               | 40.667    | 8.72448089339e-05 |
| 185 | 2               | 2               | 31549             | 55757           | 61     | 61                  | 39              | 4               | 4               | 37.454    | 0.0               |
| 186 | 2               | 2               | 20874             | 13665           | 25     | 6                   | 7               | 3               | 3               | 32.134    | 8.72448089339e-05 |
| 187 | 2               | 2               | 34294             | 36650           | 57     | 28                  | 19              | 5               | 5               | 72.717    | 0.0               |
| 188 | 2               | 2               | 28261             | 7731            | 16     | 37                  | 8               | 3               | 3               | -10.440   | 0.035             |
| 189 | 2               | 2               | 47821             | 27683           | 12     | 63                  | 37              | 3               | 3               | -41.989   | 0.00140914265847  |
| 190 | 2               | 2               | 15992             | 51819           | 2      | 29                  | 77              | 3               | 3               | -64.763   | 0.255             |
| 191 | 2               | 2               | 26548             | 40600           | 20     | 37                  | 77              | 3               | 3               | -58.262   | 0.289816708805    |
| 192 | 2               | 2               | 84806             | 91931           | 26     | 97                  | 59              | 5               | 5               | -74.596   | 0.126922156862    |
| 193 | 2               | 2               | 52675             | 54299           | 69     | 34                  | 75              | 8               | 8               | 26.608    | 1.11022302463e-16 |
| 194 | 2               | 2               | 44821             | 17025           | 31     | 88                  | 10              | 3               | 3               | -30.661   | 0.033             |
| 195 | 2               | 2               | 90822             | 84112           | 137    | 48                  | 114             | 12              | 12              | 94.532    | 0.0               |
| 196 | 2               | 2               | 60405             | 81960           | 20     | 96                  | 222             | 3               | 3               | -194.345  | 0.58096672684     |
| 197 | 2               | 2               | 30648             | 59886           | 11     | 57                  | 135             | 3               | 3               | -120.528  | 0.729630956772    |
| 198 | 2               | 2               | 41734             | 99198           | 73     | 32                  | 130             | 3               | 3               | -35.239   | 0.000262012292656 |
| 199 | 2               | 3               | 585032            | 1187830         | 410    | 757                 | 1970            | 39              | 36              | -1543.824 | 0.935826247535    |
| 200 | 2               | 4               | 235293            | 244812          | 34     | 355                 | 503             | 13              | 13              | -575.427  | 0.999993514071    |
| 201 | 2               | 5               | 5332              | 47828           | 10     | 3                   | 25              | 3               | 3               | -4.460    | 0.003             |
| 202 | 2               | 7               | 1302616           | 168496          | 80     | 2448                | 247             | 12              | 10              | -1780.346 | 1.0               |
| 203 | 2               | 7               | 498468            | 552000          | 98     | 743                 | 897             | 16              | 18              | -973.489  | 0.319294937341    |
| 204 | 2               | 7               | 311940            | 268835          | 28     | 488                 | 396             | 8               | 8               | -524.384  | 0.109895065624    |
| 205 | 2               | 7               | 2546              | 2681            | 5      | 2                   | 1               | 3               | 3               | 3.191     | 0.107             |
| 206 | 2               | 9               | 412622            | 553721          | 101    | 754                 | 712             | 10              | 11              | -913.120  | 0.999525410381    |
| 207 | 2               | 11              | 520880            | 654061          | 86     | 796                 | 788             | 23              | 22              | -932.857  | 0.17429786093     |
| 208 | 2               | 13              | 454079            | 426127          | 77     | 708                 | 651             | 10              | 9               | -775.021  | 0.00949447652496  |
| 209 | 2               | 13              | 173508            | 392109          | 12     | 348                 | 615             | 7               | 6               | -609.372  | 0.452536610304    |
| 210 | 2               | 14              | 462864            | 529675          | 100    | 643                 | 831             | 18              | 17              | -864.900  | 0.23574705508     |
| 211 | 3               | 1               | 4057460           | 654559          | 529    | 4472                | 1174            | 34              | 32              | -3184.338 | 0.970192695037    |

Continued on next page

Table ST-7 – continued from previous page

| #   | Scaffold |          | Cluster size (bp) |          | # Hits | # Unaccounted exons |          | # Genes found |          | score     | p-value           |
|-----|----------|----------|-------------------|----------|--------|---------------------|----------|---------------|----------|-----------|-------------------|
|     | S. comm. | A. bisp. | S. comm.          | A. bisp. |        | S. comm.            | A. bisp. | S. comm.      | A. bisp. |           |                   |
| 212 | 3        | 1        | 677452            | 1130575  | 182    | 983                 | 2197     | 45            | 47       | -2101.891 | 1.0               |
| 213 | 3        | 4        | 2119010           | 677585   | 368    | 3143                | 963      | 17            | 17       | -2384.237 | 0.999769857586    |
| 214 | 3        | 4        | 79246             | 124430   | 15     | 144                 | 277      | 5             | 5        | -305.745  | 0.999999993362    |
| 215 | 3        | 5        | 490579            | 804752   | 102    | 649                 | 1523     | 38            | 41       | -1413.842 | 0.999981364566    |
| 216 | 3        | 5        | 264204            | 297954   | 13     | 425                 | 505      | 8             | 8        | -619.455  | 0.999412122772    |
| 217 | 3        | 5        | 442774            | 437095   | 61     | 609                 | 679      | 12            | 11       | -773.656  | 0.358513520127    |
| 218 | 3        | 6        | 776553            | 720290   | 954    | 612                 | 746      | 86            | 91       | 463.380   | 0.0               |
| 219 | 3        | 6        | 671982            | 351439   | 664    | 572                 | 146      | 51            | 42       | 570.018   | 0.0               |
| 220 | 3        | 6        | 619940            | 239368   | 411    | 701                 | 138      | 46            | 41       | 57.894    | 0.0               |
| 221 | 3        | 6        | 450334            | 966929   | 459    | 402                 | 1376     | 27            | 27       | -623.790  | 0.0               |
| 222 | 3        | 6        | 573494            | 1014955  | 585    | 544                 | 1408     | 49            | 50       | -574.370  | 0.0               |
| 223 | 3        | 6        | 2442713           | 374557   | 871    | 3269                | 239      | 47            | 45       | -992.665  | 0.0               |
| 224 | 3        | 6        | 464713            | 633077   | 689    | 347                 | 557      | 72            | 79       | 462.256   | 0.0               |
| 225 | 3        | 6        | 669652            | 30013    | 22     | 936                 | 2        | 6             | 5        | -513.725  | 0.002875          |
| 226 | 3        | 6        | 530847            | 874675   | 522    | 491                 | 1136     | 62            | 69       | -321.610  | 0.0               |
| 227 | 3        | 6        | 545824            | 989991   | 808    | 361                 | 1044     | 94            | 102      | 239.616   | 0.0               |
| 228 | 3        | 6        | 479961            | 582332   | 478    | 441                 | 740      | 45            | 50       | -138.508  | 0.0               |
| 229 | 3        | 6        | 826945            | 901487   | 777    | 817                 | 1132     | 77            | 80       | -331.285  | 0.0               |
| 230 | 3        | 6        | 349479            | 380790   | 414    | 233                 | 364      | 43            | 42       | 253.990   | 0.0               |
| 231 | 3        | 6        | 111701            | 83306    | 57     | 135                 | 112      | 10            | 9        | -56.795   | 0.0               |
| 232 | 3        | 6        | 135871            | 202930   | 84     | 199                 | 182      | 12            | 11       | -111.671  | 1.11022302463e-16 |
| 233 | 3        | 6        | 176972            | 228975   | 237    | 160                 | 319      | 20            | 22       | 29.877    | 0.0               |
| 234 | 3        | 6        | 177821            | 103434   | 97     | 275                 | 135      | 7             | 7        | -154.786  | 3.69329791209e-05 |
| 235 | 3        | 6        | 179901            | 390455   | 125    | 177                 | 409      | 7             | 9        | -212.170  | 3.44169137634e-15 |
| 236 | 3        | 6        | 155323            | 180853   | 78     | 175                 | 229      | 10            | 9        | -156.776  | 1.16790686011e-08 |
| 237 | 3        | 6        | 86499             | 170270   | 33     | 147                 | 313      | 6             | 6        | -278.436  | 0.61495312546     |
| 238 | 3        | 6        | 285124            | 253804   | 122    | 323                 | 361      | 14            | 14       | -258.267  | 0.0               |
| 239 | 3        | 6        | 53781             | 82431    | 64     | 55                  | 96       | 5             | 5        | -12.743   | 4.98595609244e-11 |
| 240 | 3        | 6        | 113155            | 144311   | 72     | 167                 | 160      | 10            | 9        | -93.952   | 1.66533453694e-15 |
| 241 | 3        | 6        | 71666             | 178286   | 24     | 137                 | 179      | 4             | 4        | -167.181  | 0.00394023778264  |
| 242 | 3        | 6        | 3679              | 3582     | 13     | 0                   | 1        | 3             | 3        | 19.058    | 8.72448089339e-05 |
| 243 | 3        | 6        | 3802              | 5822     | 11     | 0                   | 11       | 3             | 3        | 7.993     | 0.000959692898273 |
| 244 | 3        | 6        | 22746             | 41752    | 8      | 13                  | 11       | 3             | 3        | 0.407     | 8.72448089339e-05 |
| 245 | 3        | 6        | 62727             | 27110    | 27     | 28                  | 16       | 3             | 3        | -0.179    | 0.00652287413099  |
| 246 | 3        | 6        | 60968             | 76971    | 6      | 58                  | 24       | 4             | 4        | -56.362   | 0.996             |
| 247 | 3        | 6        | 140380            | 66394    | 1      | 0                   | 0        | 3             | 3        | 0.058     | 0.674             |
| 248 | 3        | 9        | 85923             | 58972    | 9      | 5                   | 0        | 3             | 3        | 6.411     | 0.034             |
| 249 | 3        | 10       | 373283            | 589112   | 30     | 422                 | 599      | 12            | 11       | -536.724  | 7.77156117238e-16 |
| 250 | 3        | 11       | 557829            | 357744   | 54     | 796                 | 531      | 19            | 21       | -776.790  | 0.0847825194634   |
| 251 | 3        | 13       | 468548            | 498613   | 70     | 698                 | 709      | 18            | 16       | -822.410  | 0.051707604336    |
| 252 | 3        | 14       | 630401            | 503416   | 91     | 977                 | 794      | 26            | 27       | -1126.369 | 0.999987557447    |
| 253 | 3        | 14       | 462057            | 415896   | 31     | 558                 | 690      | 14            | 13       | -757.949  | 0.108079402908    |
| 254 | 3        | 15       | 357973            | 437034   | 41     | 468                 | 582      | 11            | 9        | -581.997  | 6.43602932282e-07 |
| 255 | 3        | 18       | 9550              | 74862    | 19     | 20                  | 96       | 3             | 3        | -54.424   | 0.0213940172999   |
| 256 | 4        | 1        | 293783            | 183982   | 23     | 417                 | 409      | 8             | 9        | -578.471  | 0.999999999958    |
| 257 | 4        | 2        | 559641            | 680494   | 180    | 759                 | 1568     | 26            | 22       | -1563.993 | 1.0               |
| 258 | 4        | 2        | 194963            | 350549   | 70     | 263                 | 502      | 7             | 6        | -459.286  | 0.837866401282    |
| 259 | 4        | 3        | 1572886           | 2089589  | 1075   | 1811                | 2882     | 11            | 12       | -2203.348 | 4.9309319756e-05  |
| 260 | 4        | 3        | 352296            | 363396   | 164    | 443                 | 391      | 8             | 8        | -430.341  | 0.716081435377    |
| 261 | 4        | 3        | 191278            | 415669   | 32     | 303                 | 570      | 7             | 8        | -552.161  | 0.833899922781    |
| 262 | 4        | 3        | 95790             | 114708   | 8      | 68                  | 93       | 5             | 5        | -96.498   | 0.414             |
| 263 | 4        | 3        | 49737             | 23848    | 5      | 30                  | 8        | 3             | 3        | -6.887    | 8.72448089339e-05 |
| 264 | 4        | 5        | 445085            | 334579   | 53     | 568                 | 430      | 17            | 15       | -592.686  | 0.484994537524    |
| 265 | 4        | 5        | 175717            | 206547   | 14     | 215                 | 329      | 7             | 6        | -322.560  | 0.0288147647158   |
| 266 | 4        | 7        | 619652            | 840831   | 989    | 430                 | 979      | 84            | 89       | 277.916   | 0.0               |

Continued on next page

Table ST-7 – continued from previous page

| #   | Scaffold        |                 | Cluster size (bp) |                 | # Hits | # Unaccounted exons |                 | # Genes found   |                 | score     | p-value           |
|-----|-----------------|-----------------|-------------------|-----------------|--------|---------------------|-----------------|-----------------|-----------------|-----------|-------------------|
|     | <i>S. comm.</i> | <i>A. bisp.</i> | <i>S. comm.</i>   | <i>A. bisp.</i> |        | <i>S. comm.</i>     | <i>A. bisp.</i> | <i>S. comm.</i> | <i>A. bisp.</i> |           |                   |
| 267 | 4               | 7               | 690993            | 835927          | 811    | 639                 | 1237            | 69              | 75              | -330.869  | 0.0               |
| 268 | 4               | 7               | 752896            | 996800          | 896    | 718                 | 1201            | 85              | 90              | -140.969  | 0.0               |
| 269 | 4               | 7               | 924653            | 756243          | 1224   | 788                 | 787             | 103             | 107             | 433.715   | 0.0               |
| 270 | 4               | 7               | 1243410           | 184210          | 279    | 1615                | 137             | 30              | 25              | -681.140  | 0.0               |
| 271 | 4               | 7               | 829545            | 903567          | 750    | 769                 | 1194            | 92              | 88              | -256.497  | 0.0               |
| 272 | 4               | 7               | 541447            | 526661          | 200    | 641                 | 572             | 32              | 26              | -462.612  | 0.0               |
| 273 | 4               | 7               | 205243            | 239809          | 124    | 217                 | 303             | 17              | 16              | -122.141  | 0.0               |
| 274 | 4               | 7               | 235068            | 232401          | 102    | 335                 | 322             | 17              | 17              | -248.761  | 0.0               |
| 275 | 4               | 7               | 206107            | 137331          | 167    | 249                 | 94              | 20              | 19              | 53.487    | 0.0               |
| 276 | 4               | 7               | 127542            | 180092          | 130    | 90                  | 199             | 15              | 14              | 11.786    | 0.0               |
| 277 | 4               | 7               | 65397             | 140222          | 36     | 62                  | 152             | 5               | 5               | -123.539  | 0.880954798669    |
| 278 | 4               | 7               | 138645            | 252701          | 46     | 155                 | 328             | 9               | 9               | -230.343  | 3.69568098346e-09 |
| 279 | 4               | 7               | 87936             | 91767           | 56     | 119                 | 124             | 7               | 7               | -79.882   | 9.19068725569e-08 |
| 280 | 4               | 7               | 19556             | 12935           | 4      | 22                  | 11              | 3               | 3               | -3.276    | 8.72448089339e-05 |
| 281 | 4               | 7               | 27795             | 15851           | 18     | 35                  | 11              | 3               | 3               | 15.691    | 0.0               |
| 282 | 4               | 7               | 12185             | 34068           | 20     | 12                  | 49              | 3               | 3               | -13.583   | 0.000312816668873 |
| 283 | 4               | 7               | 60320             | 3949            | 9      | 75                  | 1               | 3               | 3               | -32.978   | 0.036             |
| 284 | 4               | 7               | 45169             | 8867            | 17     | 59                  | 7               | 3               | 3               | -7.275    | 8.72448089339e-05 |
| 285 | 4               | 8               | 4121              | 3991            | 5      | 0                   | 0               | 3               | 3               | 3.497     | 0.351             |
| 286 | 4               | 8               | 42775             | 28736           | 3      | 64                  | 40              | 3               | 3               | -58.076   | 0.108             |
| 287 | 4               | 8               | 38025             | 88716           | 23     | 36                  | 81              | 3               | 3               | -13.202   | 0.0               |
| 288 | 4               | 9               | 559002            | 686956          | 51     | 554                 | 937             | 12              | 13              | -802.131  | 0.0               |
| 289 | 4               | 9               | 46951             | 72407           | 15     | 42                  | 103             | 3               | 3               | -56.388   | 1.00441925888e-08 |
| 290 | 4               | 10              | 605395            | 355150          | 82     | 749                 | 515             | 24              | 24              | -601.566  | 0.0               |
| 291 | 4               | 10              | 1588586           | 236631          | 205    | 2218                | 293             | 20              | 21              | -1261.370 | 1.29993238396e-10 |
| 292 | 4               | 10              | 427189            | 225474          | 67     | 514                 | 406             | 20              | 20              | -495.703  | 0.000499781485129 |
| 293 | 4               | 10              | 207615            | 236631          | 38     | 348                 | 352             | 8               | 10              | -403.731  | 0.0712255928761   |
| 294 | 4               | 10              | 238168            | 225474          | 56     | 290                 | 283             | 4               | 4               | -297.752  | 0.00165748975384  |
| 295 | 4               | 17              | 69467             | 40931           | 2      | 115                 | 41              | 3               | 3               | -96.098   | 0.618             |
| 296 | 4               | 19              | 70362             | 13318           | 15     | 71                  | 2               | 4               | 4               | -2.542    | 8.72448089339e-05 |
| 297 | 4               | 19              | 9254              | 12362           | 19     | 3                   | 21              | 3               | 3               | 15.269    | 8.72448089339e-05 |
| 298 | 5               | 1               | 205764            | 380871          | 53     | 340                 | 762             | 7               | 7               | -742.980  | 0.999999780079    |
| 299 | 5               | 2               | 720880            | 390169          | 98     | 1284                | 782             | 21              | 20              | -1305.469 | 0.999993298802    |
| 300 | 5               | 2               | 370366            | 542155          | 97     | 557                 | 745             | 16              | 18              | -722.375  | 0.000657585565974 |
| 301 | 5               | 3               | 526035            | 1875416         | 872    | 427                 | 2436            | 29              | 38              | -796.913  | 0.0               |
| 302 | 5               | 3               | 546156            | 672251          | 302    | 606                 | 708             | 37              | 38              | -401.478  | 0.0               |
| 303 | 5               | 3               | 463584            | 954040          | 303    | 498                 | 1437            | 25              | 27              | -905.391  | 0.0               |
| 304 | 5               | 3               | 420416            | 943557          | 248    | 456                 | 1487            | 32              | 29              | -993.290  | 3.72940789362e-10 |
| 305 | 5               | 3               | 1381513           | 757493          | 701    | 1497                | 828             | 18              | 15              | -449.084  | 0.0               |
| 306 | 5               | 3               | 257409            | 2233667         | 229    | 253                 | 2500            | 16              | 15              | -1462.932 | 0.0               |
| 307 | 5               | 3               | 938457            | 266951          | 73     | 1354                | 388             | 11              | 11              | -954.837  | 1.80056842569e-05 |
| 308 | 5               | 3               | 871546            | 1432857         | 757    | 845                 | 1965            | 11              | 12              | -879.060  | 0.0               |
| 309 | 5               | 3               | 200321            | 540204          | 97     | 227                 | 581             | 9               | 10              | -388.459  | 3.86110365902e-10 |
| 310 | 5               | 3               | 186468            | 336337          | 78     | 135                 | 541             | 8               | 8               | -364.450  | 0.00488807925513  |
| 311 | 5               | 3               | 1103468           | 174220          | 43     | 1507                | 257             | 7               | 7               | -993.727  | 0.000679928168429 |
| 312 | 5               | 3               | 814475            | 1379445         | 1005   | 860                 | 1628            | 96              | 97              | -362.589  | 0.0               |
| 313 | 5               | 3               | 287941            | 196906          | 114    | 363                 | 354             | 14              | 15              | -307.120  | 2.17125206703e-10 |
| 314 | 5               | 3               | 240963            | 542821          | 206    | 365                 | 866             | 23              | 24              | -507.969  | 0.0               |
| 315 | 5               | 3               | 1747996           | 303846          | 301    | 2560                | 391             | 15              | 15              | -1366.684 | 0.0               |
| 316 | 5               | 3               | 315262            | 405387          | 254    | 397                 | 557             | 31              | 28              | -232.410  | 0.0               |
| 317 | 5               | 3               | 289471            | 537509          | 123    | 455                 | 780             | 13              | 12              | -633.269  | 9.51827561213e-09 |
| 318 | 5               | 3               | 102125            | 82240           | 26     | 148                 | 127             | 7               | 7               | -165.885  | 0.904727935601    |
| 319 | 5               | 3               | 6083              | 6807            | 16     | 1                   | 0               | 3               | 3               | 25.164    | 8.72448089339e-05 |
| 320 | 5               | 3               | 9496              | 12987           | 35     | 0                   | 4               | 5               | 5               | 47.572    | 8.72448089339e-05 |
| 321 | 5               | 3               | 6852              | 11436           | 21     | 1                   | 7               | 3               | 3               | 30.265    | 8.72448089339e-05 |

Continued on next page

Table ST-7 – continued from previous page

| #   | Scaffold        |                 | Cluster size (bp) |                 | # Hits | # Unaccounted exons |                 | # Genes found   |                 | score     | p-value           |
|-----|-----------------|-----------------|-------------------|-----------------|--------|---------------------|-----------------|-----------------|-----------------|-----------|-------------------|
|     | <i>S. comm.</i> | <i>A. bisp.</i> | <i>S. comm.</i>   | <i>A. bisp.</i> |        | <i>S. comm.</i>     | <i>A. bisp.</i> | <i>S. comm.</i> | <i>A. bisp.</i> |           |                   |
| 322 | 5               | 3               | 22348             | 26653           | 20     | 27                  | 36              | 3               | 3               | -20.117   | 0.0331052240159   |
| 323 | 5               | 3               | 35778             | 53496           | 18     | 63                  | 118             | 3               | 3               | -93.548   | 0.0192006605445   |
| 324 | 5               | 3               | 21525             | 35904           | 9      | 36                  | 48              | 3               | 3               | -41.926   | 0.057             |
| 325 | 5               | 3               | 38569             | 65893           | 18     | 54                  | 60              | 3               | 3               | -54.301   | 0.0788536219878   |
| 326 | 5               | 3               | 41967             | 60167           | 15     | 54                  | 71              | 3               | 3               | -62.149   | 0.0447855066358   |
| 327 | 5               | 3               | 59778             | 32279           | 15     | 86                  | 7               | 3               | 3               | -48.606   | 0.656             |
| 328 | 5               | 4               | 250328            | 390037          | 30     | 254                 | 522             | 7               | 8               | -429.081  | 4.66215097639e-07 |
| 329 | 5               | 4               | 153698            | 158601          | 23     | 274                 | 355             | 5               | 5               | -423.179  | 0.999942597189    |
| 330 | 5               | 4               | 83173             | 16853           | 10     | 118                 | 10              | 3               | 3               | -53.953   | 0.000174489617868 |
| 331 | 5               | 6               | 404267            | 705027          | 164    | 669                 | 1293            | 22              | 30              | -1232.255 | 0.999974961381    |
| 332 | 5               | 9               | 156496            | 57913           | 12     | 331                 | 50              | 4               | 4               | -228.567  | 0.737389223558    |
| 333 | 5               | 10              | 542053            | 169259          | 112    | 746                 | 220             | 15              | 15              | -485.517  | 0.00284714479539  |
| 334 | 5               | 10              | 327265            | 525116          | 41     | 544                 | 382             | 10              | 9               | -512.559  | 0.000216794213956 |
| 335 | 5               | 13              | 256735            | 231660          | 30     | 247                 | 346             | 8               | 9               | -315.448  | 1.62264872483e-06 |
| 336 | 5               | 15              | 971088            | 679726          | 178    | 1278                | 284             | 13              | 14              | -725.305  | 3.5527136788e-12  |
| 337 | 5               | 15              | 73888             | 158998          | 41     | 64                  | 128             | 4               | 4               | -74.747   | 0.000174824660121 |
| 338 | 5               | 18              | 28915             | 59446           | 9      | 54                  | 85              | 3               | 3               | -74.341   | 0.029             |
| 339 | 6               | 2               | 132624            | 149659          | 12     | 130                 | 195             | 5               | 5               | -188.109  | 0.0388847989019   |
| 340 | 6               | 2               | 219648            | 176041          | 22     | 238                 | 219             | 4               | 5               | -303.350  | 0.999716124226    |
| 341 | 6               | 4               | 40712             | 33550           | 2      | 33                  | 32              | 3               | 3               | -37.916   | 0.256             |
| 342 | 6               | 5               | 143758            | 336874          | 65     | 222                 | 594             | 6               | 7               | -514.146  | 0.988336021752    |
| 343 | 6               | 5               | 75988             | 95269           | 9      | 109                 | 131             | 4               | 4               | -148.623  | 0.61              |
| 344 | 6               | 6               | 245595            | 511835          | 45     | 325                 | 940             | 11              | 14              | -844.027  | 0.999925531531    |
| 345 | 6               | 8               | 719708            | 176493          | 53     | 1035                | 268             | 15              | 15              | -736.446  | 0.0244377549486   |
| 346 | 6               | 8               | 271233            | 397728          | 49     | 401                 | 642             | 10              | 10              | -625.818  | 0.18131634286     |
| 347 | 6               | 8               | 40712             | 301324          | 6      | 0                   | 231             | 5               | 6               | -154.361  | 0.777             |
| 348 | 6               | 8               | 379319            | 765230          | 78     | 563                 | 751             | 13              | 13              | -697.016  | 7.82547360245e-11 |
| 349 | 6               | 8               | 87548             | 92804           | 10     | 113                 | 156             | 4               | 4               | -165.011  | 0.488             |
| 350 | 6               | 10              | 4077721           | 1515892         | 377    | 2288                | 457             | 44              | 39              | -1165.055 | 0.0               |
| 351 | 6               | 10              | 4702261           | 1486541         | 450    | 3097                | 421             | 47              | 37              | -1557.634 | 0.0               |
| 352 | 6               | 10              | 789147            | 1020699         | 851    | 602                 | 1094            | 91              | 93              | 111.692   | 0.0               |
| 353 | 6               | 10              | 605395            | 338032          | 198    | 735                 | 367             | 15              | 18              | -411.944  | 0.0               |
| 354 | 6               | 10              | 460430            | 2347681         | 381    | 386                 | 1550            | 8               | 9               | -671.701  | 0.0               |
| 355 | 6               | 10              | 240687            | 1388881         | 217    | 211                 | 1092            | 24              | 30              | -458.694  | 0.0               |
| 356 | 6               | 10              | 261667            | 170733          | 80     | 280                 | 192             | 15              | 15              | -179.215  | 8.83149109399e-12 |
| 357 | 6               | 10              | 427901            | 52644           | 74     | 540                 | 37              | 7               | 6               | -183.028  | 0.0               |
| 358 | 6               | 10              | 436626            | 678454          | 446    | 388                 | 829             | 47              | 49              | -171.018  | 0.0               |
| 359 | 6               | 10              | 348946            | 416493          | 333    | 337                 | 347             | 33              | 34              | 54.649    | 0.0               |
| 360 | 6               | 10              | 307698            | 394735          | 309    | 310                 | 339             | 31              | 33              | 42.494    | 0.0               |
| 361 | 6               | 10              | 145316            | 86317           | 84     | 141                 | 60              | 10              | 10              | 9.494     | 0.0               |
| 362 | 6               | 10              | 121157            | 213145          | 5      | 87                  | 303             | 4               | 4               | -222.000  | 0.000174489617868 |
| 363 | 6               | 10              | 31312             | 37223           | 29     | 46                  | 43              | 3               | 3               | -13.866   | 3.99549328622e-07 |
| 364 | 6               | 10              | 35399             | 52644           | 15     | 33                  | 81              | 3               | 3               | -48.233   | 0.000214757523817 |
| 365 | 6               | 13              | 167314            | 314226          | 76     | 187                 | 416             | 23              | 23              | -267.117  | 5.60884672041e-13 |
| 366 | 6               | 13              | 223467            | 305502          | 102    | 240                 | 397             | 13              | 14              | -210.932  | 0.0               |
| 367 | 6               | 13              | 24663             | 32748           | 12     | 0                   | 6               | 4               | 4               | 14.185    | 8.72448089339e-05 |
| 368 | 6               | 13              | 77234             | 104724          | 90     | 65                  | 124             | 8               | 8               | 5.619     | 0.0               |
| 369 | 6               | 13              | 23966             | 30553           | 26     | 31                  | 31              | 4               | 4               | -6.686    | 0.000101649974161 |
| 370 | 6               | 13              | 22918             | 21932           | 38     | 12                  | 7               | 4               | 4               | 50.647    | 8.72448089339e-05 |
| 371 | 6               | 14              | 49144             | 44783           | 1      | 0                   | 0               | 3               | 3               | 0.000     | 1.0               |
| 372 | 6               | 15              | 498853            | 561686          | 380    | 529                 | 617             | 30              | 32              | -226.437  | 0.0               |
| 373 | 6               | 15              | 58497             | 66313           | 14     | 83                  | 66              | 4               | 4               | -50.369   | 4.98456831366e-12 |
| 374 | 6               | 17              | 45324             | 52335           | 12     | 33                  | 13              | 3               | 3               | -10.111   | 0.000668226838402 |
| 375 | 6               | 17              | 91087             | 121959          | 6      | 22                  | 135             | 4               | 4               | -78.525   | 8.72448089339e-05 |
| 376 | 7               | 1               | 42801             | 25492           | 12     | 0                   | 0               | 3               | 3               | 16.770    | 0.000174489617868 |

Continued on next page

Table ST-7 – continued from previous page

| #   | Scaffold        |                 | Cluster size (bp) |                 | # Hits | # Unaccounted exons |                 | # Genes found   |                 | score     | p-value           |
|-----|-----------------|-----------------|-------------------|-----------------|--------|---------------------|-----------------|-----------------|-----------------|-----------|-------------------|
|     | <i>S. comm.</i> | <i>A. bisp.</i> | <i>S. comm.</i>   | <i>A. bisp.</i> |        | <i>S. comm.</i>     | <i>A. bisp.</i> | <i>S. comm.</i> | <i>A. bisp.</i> |           |                   |
| 377 | 7               | 2               | 501538            | 229983          | 29     | 891                 | 504             | 18              | 16              | -924.607  | 0.999999913854    |
| 378 | 7               | 2               | 185870            | 229983          | 13     | 311                 | 516             | 7               | 7               | -569.564  | 0.999996227174    |
| 379 | 7               | 4               | 40222             | 49077           | 27     | 44                  | 59              | 3               | 3               | -12.627   | 2.0061730055e-13  |
| 380 | 7               | 4               | 53595             | 93152           | 3      | 53                  | 214             | 3               | 3               | -189.574  | 0.997             |
| 381 | 7               | 5               | 191427            | 133856          | 256    | 168                 | 49              | 31              | 31              | 256.694   | 0.0               |
| 382 | 7               | 5               | 290417            | 464993          | 320    | 345                 | 721             | 36              | 34              | -234.550  | 0.0               |
| 383 | 7               | 5               | 415519            | 451540          | 370    | 572                 | 666             | 45              | 39              | -280.259  | 0.0               |
| 384 | 7               | 5               | 1195827           | 133271          | 111    | 1996                | 188             | 19              | 17              | -1252.346 | 0.566181138572    |
| 385 | 7               | 5               | 375323            | 89626           | 222    | 584                 | 60              | 9               | 9               | -55.022   | 0.0               |
| 386 | 7               | 5               | 323960            | 356221          | 307    | 396                 | 526             | 30              | 30              | -150.424  | 0.0               |
| 387 | 7               | 5               | 278361            | 399047          | 478    | 267                 | 425             | 38              | 38              | 164.473   | 0.0               |
| 388 | 7               | 5               | 181530            | 247348          | 208    | 201                 | 269             | 19              | 20              | 3.132     | 0.0               |
| 389 | 7               | 5               | 39013             | 254791          | 39     | 72                  | 294             | 6               | 7               | -216.423  | 0.588614704038    |
| 390 | 7               | 5               | 194896            | 306453          | 116    | 288                 | 530             | 19              | 19              | -429.754  | 0.0314790360963   |
| 391 | 7               | 5               | 99171             | 254451          | 56     | 126                 | 347             | 12              | 12              | -240.777  | 0.000383540995772 |
| 392 | 7               | 5               | 39161             | 44189           | 52     | 63                  | 61              | 7               | 7               | 3.930     | 4.4408920985e-16  |
| 393 | 7               | 5               | 89098             | 78135           | 112    | 110                 | 93              | 10              | 10              | 29.634    | 0.0               |
| 394 | 7               | 5               | 101226            | 113577          | 113    | 109                 | 146             | 13              | 14              | 13.376    | 0.0               |
| 395 | 7               | 5               | 122669            | 83794           | 65     | 115                 | 137             | 6               | 6               | -51.036   | 0.0               |
| 396 | 7               | 5               | 132565            | 160314          | 65     | 221                 | 323             | 9               | 7               | -300.352  | 0.258817362771    |
| 397 | 7               | 5               | 64242             | 148060          | 45     | 92                  | 190             | 9               | 9               | -106.852  | 1.74074310522e-10 |
| 398 | 7               | 5               | 236592            | 303304          | 161    | 268                 | 334             | 16              | 16              | -144.046  | 0.0               |
| 399 | 7               | 5               | 131310            | 137510          | 138    | 134                 | 160             | 9               | 9               | 22.052    | 0.0               |
| 400 | 7               | 5               | 41108             | 174936          | 54     | 20                  | 238             | 9               | 9               | -94.472   | 5.38504674186e-09 |
| 401 | 7               | 5               | 35349             | 89626           | 60     | 34                  | 159             | 6               | 6               | -29.524   | 0.0               |
| 402 | 7               | 5               | 123600            | 39640           | 38     | 181                 | 45              | 6               | 6               | -76.296   | 1.31023664141e-08 |
| 403 | 7               | 5               | 118325            | 121318          | 80     | 156                 | 217             | 9               | 9               | -151.634  | 3.31987199825e-05 |
| 404 | 7               | 5               | 20895             | 15197           | 32     | 18                  | 4               | 6               | 6               | 35.321    | 8.72448089339e-05 |
| 405 | 7               | 5               | 27820             | 45079           | 19     | 30                  | 71              | 3               | 3               | -32.127   | 1.71921616465e-06 |
| 406 | 7               | 5               | 17542             | 57666           | 9      | 19                  | 113             | 3               | 3               | -89.002   | 0.967             |
| 407 | 7               | 5               | 116222            | 37559           | 14     | 1                   | 0               | 3               | 3               | 22.533    | 8.72448089339e-05 |
| 408 | 7               | 7               | 163912            | 312382          | 6      | 254                 | 324             | 5               | 5               | -325.767  | 8.72448089339e-05 |
| 409 | 7               | 9               | 3848              | 18333           | 4      | 0                   | 16              | 3               | 3               | 1.300     | 8.72448089339e-05 |
| 410 | 7               | 10              | 115887            | 152955          | 18     | 180                 | 122             | 5               | 5               | -188.404  | 0.938989816507    |
| 411 | 7               | 12              | 404663            | 417265          | 47     | 582                 | 477             | 15              | 12              | -676.143  | 0.999090017055    |
| 412 | 7               | 12              | 52191             | 50894           | 6      | 80                  | 84              | 3               | 3               | -103.545  | 0.762             |
| 413 | 7               | 16              | 289704            | 531054          | 141    | 473                 | 589             | 19              | 22              | -531.453  | 3.81395460668e-05 |
| 414 | 7               | 16              | 278650            | 542514          | 147    | 445                 | 623             | 20              | 22              | -526.440  | 4.60676789416e-06 |
| 415 | 7               | 16              | 216316            | 400202          | 61     | 287                 | 447             | 12              | 12              | -379.805  | 1.35281402691e-06 |
| 416 | 7               | 16              | 134132            | 160766          | 29     | 238                 | 271             | 3               | 3               | -283.518  | 0.00823303057071  |
| 417 | 7               | 16              | 104427            | 79905           | 7      | 212                 | 142             | 3               | 3               | -237.529  | 0.998             |
| 418 | 7               | 19              | 3848              | 4556            | 5      | 0                   | 0               | 3               | 3               | 5.367     | 0.065             |
| 419 | 8               | 1               | 567454            | 460401          | 69     | 887                 | 1019            | 19              | 21              | -1274.670 | 0.999999999946    |
| 420 | 8               | 2               | 866486            | 176462          | 67     | 1415                | 224             | 10              | 8               | -954.446  | 0.524942617139    |
| 421 | 8               | 2               | 866486            | 1520196         | 397    | 1242                | 2895            | 17              | 17              | -2620.447 | 1.0               |
| 422 | 8               | 2               | 80277             | 153718          | 6      | 165                 | 252             | 3               | 3               | -270.285  | 0.838             |
| 423 | 8               | 3               | 88542             | 260705          | 12     | 179                 | 261             | 5               | 5               | -245.332  | 0.000176703578806 |
| 424 | 8               | 3               | 16966             | 46733           | 5      | 3                   | 9               | 3               | 3               | -6.529    | 0.826             |
| 425 | 8               | 4               | 110518            | 113183          | 10     | 163                 | 204             | 5               | 5               | -257.646  | 1.0               |
| 426 | 8               | 5               | 274397            | 248745          | 225    | 308                 | 328             | 37              | 35              | -101.925  | 0.0               |
| 427 | 8               | 5               | 114494            | 208032          | 149    | 92                  | 348             | 10              | 10              | -81.826   | 0.0               |
| 428 | 8               | 5               | 99316             | 262906          | 136    | 74                  | 288             | 11              | 12              | -47.373   | 0.0               |
| 429 | 8               | 5               | 460641            | 351834          | 380    | 573                 | 518             | 45              | 47              | -183.835  | 0.0               |
| 430 | 8               | 5               | 185497            | 51354           | 126    | 186                 | 27              | 9               | 9               | 78.187    | 0.0               |
| 431 | 8               | 5               | 745741            | 650173          | 279    | 1219                | 935             | 47              | 46              | -1101.959 | 8.73653477345e-05 |

Continued on next page

Table ST-7 – continued from previous page

| #   | Scaffold        |                 | Cluster size (bp) |                 | # Hits | # Unaccounted exons |                 | # Genes found   |                 | score     | p-value           |
|-----|-----------------|-----------------|-------------------|-----------------|--------|---------------------|-----------------|-----------------|-----------------|-----------|-------------------|
|     | <i>S. comm.</i> | <i>A. bisp.</i> | <i>S. comm.</i>   | <i>A. bisp.</i> |        | <i>S. comm.</i>     | <i>A. bisp.</i> | <i>S. comm.</i> | <i>A. bisp.</i> |           |                   |
| 432 | 8               | 5               | 316166            | 193495          | 161    | 444                 | 224             | 20              | 17              | -189.841  | 0.0               |
| 433 | 8               | 5               | 211135            | 211348          | 184    | 208                 | 272             | 18              | 19              | -39.374   | 0.0               |
| 434 | 8               | 5               | 179659            | 145714          | 108    | 289                 | 184             | 13              | 14              | -165.553  | 1.17685838852e-09 |
| 435 | 8               | 5               | 288461            | 129667          | 303    | 287                 | 56              | 27              | 26              | 244.659   | 0.0               |
| 436 | 8               | 5               | 52392             | 35100           | 47     | 71                  | 45              | 8               | 8               | -4.548    | 4.54162263352e-11 |
| 437 | 8               | 5               | 160044            | 69483           | 28     | 186                 | 80              | 7               | 8               | -128.982  | 0.00455731553416  |
| 438 | 8               | 5               | 222604            | 219132          | 76     | 280                 | 471             | 12              | 14              | -414.461  | 0.0441663845666   |
| 439 | 8               | 5               | 25746             | 24489           | 17     | 42                  | 33              | 4               | 4               | -35.372   | 0.397156212661    |
| 440 | 8               | 5               | 88936             | 59977           | 29     | 152                 | 120             | 4               | 4               | -145.379  | 0.145589333891    |
| 441 | 8               | 5               | 5366              | 5111            | 13     | 2                   | 0               | 3               | 3               | 23.205    | 8.72448089339e-05 |
| 442 | 8               | 5               | 21298             | 23837           | 29     | 17                  | 32              | 3               | 3               | 19.280    | 1.59872115546e-14 |
| 443 | 8               | 5               | 18625             | 41570           | 18     | 1                   | 4               | 3               | 3               | 27.105    | 8.72448089339e-05 |
| 444 | 8               | 5               | 12428             | 22576           | 20     | 0                   | 0               | 3               | 3               | 32.354    | 8.72448089339e-05 |
| 445 | 8               | 5               | 49083             | 71019           | 31     | 70                  | 57              | 5               | 5               | -32.360   | 1.39073479066e-07 |
| 446 | 8               | 5               | 99316             | 129142          | 29     | 149                 | 100             | 7               | 7               | -141.316  | 0.710232707816    |
| 447 | 8               | 7               | 293220            | 492480          | 47     | 504                 | 963             | 11              | 13              | -933.051  | 0.904222173161    |
| 448 | 8               | 12              | 139094            | 184874          | 20     | 226                 | 236             | 4               | 6               | -269.113  | 0.0958832930119   |
| 449 | 8               | 13              | 309026            | 698431          | 106    | 479                 | 1006            | 16              | 18              | -815.784  | 5.20766676337e-07 |
| 450 | 8               | 14              | 282737            | 232520          | 17     | 405                 | 402             | 11              | 9               | -542.742  | 0.999973519784    |
| 451 | 9               | 2               | 909351            | 995563          | 269    | 1152                | 1837            | 42              | 44              | -1898.183 | 0.999999999996    |
| 452 | 9               | 2               | 364632            | 248082          | 36     | 520                 | 361             | 13              | 13              | -555.140  | 0.988051009383    |
| 453 | 9               | 2               | 106332            | 197473          | 20     | 155                 | 300             | 6               | 6               | -267.535  | 0.0611151738484   |
| 454 | 9               | 3               | 72115             | 44692           | 11     | 106                 | 78              | 3               | 3               | -112.640  | 0.778441187696    |
| 455 | 9               | 5               | 94085             | 207420          | 8      | 145                 | 465             | 6               | 5               | -445.814  | 1.0               |
| 456 | 9               | 8               | 477858            | 1137708         | 295    | 494                 | 956             | 33              | 38              | -423.413  | 0.0               |
| 457 | 9               | 8               | 375652            | 687766          | 203    | 422                 | 811             | 25              | 30              | -474.213  | 0.0               |
| 458 | 9               | 8               | 101481            | 293781          | 178    | 110                 | 306             | 11              | 13              | -31.579   | 0.0               |
| 459 | 9               | 8               | 10397             | 20724           | 10     | 24                  | 39              | 3               | 3               | -19.472   | 8.72448089339e-05 |
| 460 | 9               | 8               | 131840            | 77964           | 33     | 110                 | 81              | 5               | 5               | -54.385   | 4.83058038014e-13 |
| 461 | 9               | 9               | 1375122           | 184044          | 365    | 1706                | 117             | 20              | 20              | -605.030  | 0.0               |
| 462 | 9               | 9               | 74020             | 382625          | 83     | 88                  | 425             | 11              | 14              | -194.793  | 0.0               |
| 463 | 9               | 9               | 85254             | 250568          | 43     | 101                 | 279             | 9               | 9               | -175.879  | 4.65452614229e-08 |
| 464 | 9               | 9               | 105630            | 104786          | 79     | 125                 | 86              | 10              | 10              | -11.763   | 0.0               |
| 465 | 9               | 9               | 101259            | 133600          | 33     | 136                 | 240             | 6               | 7               | -190.716  | 7.64192046234e-05 |
| 466 | 9               | 9               | 25204             | 31915           | 31     | 34                  | 23              | 5               | 5               | 22.234    | 0.0               |
| 467 | 9               | 9               | 85254             | 116543          | 28     | 110                 | 136             | 6               | 6               | -115.728  | 0.000237339496258 |
| 468 | 9               | 9               | 94507             | 58154           | 50     | 131                 | 54              | 10              | 10              | -28.709   | 5.55111512313e-16 |
| 469 | 9               | 9               | 77219             | 153405          | 86     | 73                  | 168             | 8               | 9               | -12.241   | 0.0               |
| 470 | 9               | 9               | 175770            | 54604           | 56     | 234                 | 76              | 6               | 6               | -105.849  | 4.59959847987e-10 |
| 471 | 9               | 12              | 1221270           | 327091          | 579    | 1593                | 390             | 8               | 9               | -473.381  | 0.0               |
| 472 | 9               | 12              | 50867             | 194859          | 3      | 53                  | 256             | 4               | 5               | -199.873  | 0.472             |
| 473 | 9               | 13              | 383956            | 623778          | 157    | 516                 | 856             | 19              | 20              | -657.104  | 1.11022302463e-15 |
| 474 | 9               | 13              | 116477            | 476188          | 37     | 200                 | 603             | 9               | 13              | -453.327  | 1.60689774276e-05 |
| 475 | 9               | 13              | 130410            | 314249          | 24     | 210                 | 279             | 18              | 17              | -269.238  | 0.000744092601468 |
| 476 | 9               | 13              | 52303             | 161081          | 4      | 103                 | 251             | 4               | 4               | -232.088  | 0.793             |
| 477 | 9               | 17              | 149830            | 152191          | 6      | 198                 | 257             | 3               | 4               | -226.062  | 8.72448089339e-05 |
| 478 | 9               | 19              | 72254             | 115062          | 1      | 0                   | 0               | 3               | 3               | 0.000     | 1.0               |
| 479 | 10              | 3               | 103140            | 87751           | 25     | 73                  | 88              | 4               | 4               | -32.541   | 0.0               |
| 480 | 10              | 5               | 164897            | 31103           | 16     | 248                 | 60              | 5               | 5               | -162.997  | 0.0145550927019   |
| 481 | 10              | 9               | 66476             | 114897          | 14     | 88                  | 123             | 5               | 5               | -94.822   | 3.97178947509e-08 |
| 482 | 10              | 11              | 951233            | 1268914         | 933    | 661                 | 1131            | 104             | 100             | 152.097   | 0.0               |
| 483 | 10              | 11              | 380818            | 978734          | 288    | 323                 | 1109            | 39              | 42              | -429.297  | 0.0               |
| 484 | 10              | 11              | 114396            | 263650          | 71     | 107                 | 297             | 9               | 10              | -143.945  | 2.22044604925e-16 |
| 485 | 10              | 11              | 517572            | 580539          | 171    | 464                 | 777             | 28              | 26              | -472.214  | 0.0               |
| 486 | 10              | 11              | 1095305           | 395230          | 337    | 1130                | 389             | 40              | 31              | -450.100  | 0.0               |

Continued on next page

Table ST-7 – continued from previous page

| #   | Scaffold        |                 | Cluster size (bp) |                 | # Hits | # Unaccounted exons |                 | # Genes found   |                 | score     | p-value           |
|-----|-----------------|-----------------|-------------------|-----------------|--------|---------------------|-----------------|-----------------|-----------------|-----------|-------------------|
|     | <i>S. comm.</i> | <i>A. bisp.</i> | <i>S. comm.</i>   | <i>A. bisp.</i> |        | <i>S. comm.</i>     | <i>A. bisp.</i> | <i>S. comm.</i> | <i>A. bisp.</i> |           |                   |
| 487 | 10              | 11              | 577109            | 196223          | 83     | 627                 | 266             | 15              | 14              | -439.997  | 6.94398598844e-07 |
| 488 | 10              | 11              | 200307            | 196223          | 72     | 225                 | 273             | 10              | 10              | -242.163  | 0.00137601209736  |
| 489 | 10              | 11              | 302580            | 255655          | 104    | 382                 | 247             | 12              | 12              | -229.759  | 0.0               |
| 490 | 10              | 11              | 272453            | 282182          | 97     | 277                 | 326             | 11              | 12              | -225.005  | 0.0               |
| 491 | 10              | 11              | 35583             | 10931           | 5      | 34                  | 9               | 3               | 3               | -13.499   | 0.000697958471471 |
| 492 | 10              | 14              | 431878            | 453402          | 61     | 564                 | 623             | 13              | 13              | -661.239  | 3.96584789374e-05 |
| 493 | 10              | 14              | 119529            | 95172           | 2      | 61                  | 131             | 4               | 4               | -104.804  | 0.000523468853603 |
| 494 | 11              | 4               | 516109            | 305839          | 44     | 688                 | 641             | 15              | 14              | -838.631  | 0.975044012341    |
| 495 | 11              | 7               | 46415             | 738480          | 7      | 86                  | 1051            | 10              | 12              | -740.372  | 0.27              |
| 496 | 11              | 8               | 1238706           | 1050315         | 1083   | 997                 | 822             | 113             | 117             | 415.471   | 0.0               |
| 497 | 11              | 8               | 825007            | 926767          | 746    | 819                 | 796             | 87              | 89              | 40.468    | 0.0               |
| 498 | 11              | 8               | 335248            | 89420           | 20     | 315                 | 138             | 6               | 5               | -254.610  | 0.0565395557603   |
| 499 | 11              | 8               | 419425            | 335114          | 310    | 420                 | 295             | 37              | 37              | 38.734    | 0.0               |
| 500 | 11              | 8               | 495497            | 297594          | 232    | 449                 | 334             | 21              | 19              | -80.105   | 0.0               |
| 501 | 11              | 8               | 201838            | 280977          | 145    | 233                 | 399             | 17              | 17              | -198.867  | 0.0               |
| 502 | 11              | 8               | 180809            | 195104          | 37     | 210                 | 210             | 9               | 9               | -212.769  | 0.000217398404539 |
| 503 | 11              | 8               | 64682             | 101061          | 49     | 94                  | 138             | 5               | 5               | -66.423   | 3.73701070089e-13 |
| 504 | 11              | 8               | 79541             | 64462           | 19     | 128                 | 100             | 5               | 5               | -117.015  | 0.0104693948648   |
| 505 | 11              | 12              | 77096             | 64184           | 5      | 120                 | 140             | 3               | 3               | -170.921  | 0.937             |
| 506 | 12              | 3               | 630605            | 727072          | 443    | 726                 | 1186            | 40              | 40              | -691.187  | 0.0               |
| 507 | 12              | 3               | 70022             | 119083          | 45     | 96                  | 166             | 9               | 9               | -119.506  | 0.00254028948375  |
| 508 | 12              | 3               | 320982            | 303402          | 68     | 466                 | 365             | 11              | 13              | -386.000  | 1.22124532709e-15 |
| 509 | 12              | 3               | 153361            | 214016          | 182    | 142                 | 261             | 11              | 11              | 36.138    | 0.0               |
| 510 | 12              | 3               | 23750             | 11438           | 5      | 23                  | 11              | 3               | 3               | -13.743   | 0.059             |
| 511 | 12              | 3               | 106462            | 128905          | 31     | 108                 | 205             | 5               | 4               | -152.263  | 2.62229886359e-05 |
| 512 | 12              | 3               | 130582            | 174220          | 36     | 162                 | 267             | 4               | 4               | -246.590  | 0.247186234016    |
| 513 | 12              | 9               | 176136            | 189359          | 19     | 190                 | 206             | 5               | 4               | -220.732  | 0.00900767342298  |
| 514 | 12              | 11              | 299595            | 215843          | 52     | 382                 | 283             | 9               | 9               | -338.742  | 6.6093101474e-06  |
| 515 | 12              | 14              | 217563            | 148862          | 26     | 313                 | 213             | 5               | 5               | -312.890  | 0.499652156429    |
| 516 | 12              | 19              | 81311             | 37183           | 8      | 0                   | 0               | 3               | 3               | 11.848    | 0.000261734426802 |
| 517 | 13              | 1               | 4115307           | 979737          | 723    | 630                 | 1574            | 35              | 33              | -585.732  | 0.0               |
| 518 | 13              | 1               | 4177275           | 752408          | 524    | 789                 | 1303            | 29              | 28              | -781.106  | 0.0               |
| 519 | 13              | 1               | 3598405           | 988232          | 458    | 254                 | 1777            | 42              | 41              | -841.361  | 0.0               |
| 520 | 13              | 1               | 210562            | 189135          | 406    | 147                 | 120             | 49              | 48              | 465.472   | 0.0               |
| 521 | 13              | 1               | 440831            | 274973          | 270    | 620                 | 329             | 44              | 41              | -256.176  | 0.0               |
| 522 | 13              | 1               | 410003            | 340798          | 387    | 395                 | 433             | 41              | 41              | 20.261    | 0.0               |
| 523 | 13              | 1               | 99033             | 136062          | 129    | 90                  | 148             | 18              | 18              | 49.322    | 0.0               |
| 524 | 13              | 1               | 355728            | 340488          | 197    | 529                 | 599             | 31              | 29              | -509.189  | 2.35115158453e-08 |
| 525 | 13              | 1               | 126611            | 61339           | 132    | 116                 | 27              | 18              | 18              | 130.513   | 0.0               |
| 526 | 13              | 1               | 118620            | 120630          | 73     | 106                 | 181             | 12              | 13              | -105.184  | 2.90352010494e-05 |
| 527 | 13              | 1               | 285165            | 171402          | 118    | 279                 | 228             | 23              | 21              | -175.323  | 6.16990902813e-11 |
| 528 | 13              | 2               | 84361             | 39470           | 7      | 133                 | 74              | 4               | 4               | -149.683  | 1.0               |
| 529 | 13              | 5               | 597451            | 272271          | 33     | 1087                | 522             | 14              | 12              | -1171.243 | 1.0               |
| 530 | 13              | 6               | 42705             | 80636           | 3      | 30                  | 41              | 3               | 3               | -38.928   | 0.091             |
| 531 | 13              | 9               | 170113            | 265494          | 11     | 254                 | 400             | 5               | 5               | -446.814  | 0.999891554015    |
| 532 | 13              | 10              | 28792             | 77369           | 19     | 26                  | 20              | 3               | 3               | -7.059    | 0.00412935212094  |
| 533 | 13              | 11              | 760147            | 464849          | 147    | 1211                | 651             | 20              | 17              | -1160.032 | 0.999999948514    |
| 534 | 13              | 11              | 76228             | 72686           | 4      | 97                  | 64              | 3               | 3               | -95.432   | 0.254             |
| 535 | 13              | 16              | 4016405           | 853175          | 28     | 881                 | 362             | 15              | 17              | -819.495  | 0.999999851108    |
| 536 | 14              | 2               | 92577             | 171796          | 8      | 82                  | 269             | 3               | 3               | -209.686  | 0.019             |
| 537 | 14              | 3               | 329061            | 303846          | 22     | 418                 | 507             | 7               | 7               | -531.375  | 8.76060315417e-05 |
| 538 | 14              | 5               | 121349            | 135251          | 20     | 181                 | 265             | 4               | 4               | -288.946  | 0.978593571675    |
| 539 | 14              | 12              | 152258            | 161047          | 59     | 183                 | 176             | 8               | 8               | -137.593  | 4.00461885874e-10 |
| 540 | 14              | 12              | 23157             | 30633           | 32     | 10                  | 17              | 4               | 4               | 30.223    | 8.72448089339e-05 |
| 541 | 14              | 17              | 43724             | 9850            | 18     | 64                  | 1               | 4               | 4               | -16.598   | 0.006             |

Continued on next page

Table ST-7 – continued from previous page

| #   | Scaffold        |                 | Cluster size (bp) |                 | # Hits | # Unaccounted exons |                 | # Genes found   |                 | score     | p-value           |
|-----|-----------------|-----------------|-------------------|-----------------|--------|---------------------|-----------------|-----------------|-----------------|-----------|-------------------|
|     | <i>S. comm.</i> | <i>A. bisp.</i> | <i>S. comm.</i>   | <i>A. bisp.</i> |        | <i>S. comm.</i>     | <i>A. bisp.</i> | <i>S. comm.</i> | <i>A. bisp.</i> |           |                   |
| 542 | 15              | 4               | 48137             | 46628           | 0      | 0                   | 0               | 3               | 3               | 0.000     | 0.00533006069565  |
| 543 | 15              | 7               | 234109            | 12935           | 6      | 8                   | 9               | 6               | 3               | -0.190    | 0.00174504842509  |
| 544 | 15              | 7               | 378602            | 12935           | 13     | 446                 | 8               | 9               | 3               | -217.428  | 8.72448089339e-05 |
| 545 | 15              | 7               | 8853              | 12935           | 6      | 8                   | 9               | 3               | 3               | -0.190    | 0.00174504842509  |
| 546 | 15              | 7               | 11406             | 12935           | 5      | 9                   | 10              | 3               | 3               | -0.832    | 0.000348979235736 |
| 547 | 15              | 10              | 118250            | 64937           | 5      | 178                 | 48              | 3               | 3               | -126.510  | 0.044             |
| 548 | 16              | 1               | 133722            | 49761           | 71     | 120                 | 48              | 10              | 9               | -11.951   | 3.34163807736e-11 |
| 549 | 16              | 1               | 160792            | 149770          | 111    | 108                 | 195             | 12              | 12              | -19.820   | 0.0               |
| 550 | 16              | 1               | 93138             | 66045           | 57     | 113                 | 69              | 4               | 4               | -32.157   | 2.39945840974e-11 |
| 551 | 16              | 1               | 141981            | 61780           | 76     | 179                 | 62              | 9               | 9               | -58.843   | 9.52416341349e-08 |
| 552 | 16              | 1               | 22412             | 11469           | 11     | 34                  | 4               | 3               | 3               | -4.252    | 0.000174489617868 |
| 553 | 16              | 1               | 37712             | 81900           | 22     | 29                  | 117             | 4               | 4               | -61.441   | 6.64684707841e-05 |
| 554 | 16              | 17              | 42503             | 46606           | 34     | 39                  | 45              | 3               | 3               | -5.776    | 8.93858879136e-08 |
| 555 | 17              | 1               | 560944            | 448808          | 233    | 535                 | 500             | 23              | 24              | -304.919  | 0.0               |
| 556 | 17              | 1               | 308301            | 274641          | 115    | 286                 | 292             | 15              | 16              | -184.095  | 0.0               |
| 557 | 17              | 1               | 99900             | 163001          | 22     | 151                 | 220             | 3               | 3               | -199.713  | 0.000985232288565 |
| 558 | 17              | 4               | 379320            | 448201          | 37     | 459                 | 818             | 12              | 11              | -771.525  | 0.030237424988    |
| 559 | 18              | 1               | 5648514           | 1411383         | 142    | 524                 | 3039            | 39              | 33              | -2495.575 | 1.0               |
| 560 | 18              | 4               | 144183            | 175514          | 76     | 167                 | 286             | 10              | 12              | -177.807  | 3.96671584468e-12 |
| 561 | 18              | 4               | 21323             | 13175           | 23     | 15                  | 5               | 4               | 4               | 18.379    | 8.72448089339e-05 |
| 562 | 18              | 4               | 11017             | 39684           | 11     | 4                   | 52              | 3               | 3               | -8.682    | 8.72448089339e-05 |
| 563 | 18              | 6               | 463455            | 450592          | 34     | 596                 | 733             | 12              | 11              | -806.295  | 0.0998411010122   |
| 564 | 18              | 7               | 70675             | 199600          | 6      | 77                  | 153             | 5               | 5               | -109.941  | 8.72448089339e-05 |
| 565 | 18              | 11              | 215467            | 241003          | 12     | 265                 | 215             | 8               | 8               | -276.811  | 0.0174502838535   |
| 566 | 18              | 18              | 56992             | 101678          | 13     | 73                  | 137             | 3               | 3               | -113.880  | 0.0115471515673   |
| 567 | 19              | 3               | 67174             | 209634          | 15     | 44                  | 52              | 3               | 3               | -24.714   | 3.14396508827e-10 |
| 568 | 19              | 12              | 111038            | 144474          | 35     | 151                 | 144             | 11              | 11              | -130.934  | 2.51427775699e-06 |
| 569 | 19              | 12              | 59070             | 61986           | 22     | 75                  | 30              | 5               | 5               | -31.679   | 3.15128846506e-05 |
| 570 | 19              | 12              | 119143            | 152040          | 45     | 184                 | 226             | 4               | 4               | -207.740  | 0.00183002280801  |
| 571 | 20              | 7               | 52396             | 15209           | 35     | 47                  | 3               | 4               | 4               | 26.517    | 8.72448089339e-05 |
| 572 | 20              | 7               | 2546              | 2681            | 5      | 2                   | 1               | 3               | 3               | 3.191     | 0.107             |
| 573 | 20              | 10              | 60569             | 123759          | 4      | 66                  | 206             | 4               | 4               | -162.701  | 0.034             |



| Genome A                 | Genome B                 | Proteny    |            |            | i-ADHoRe   |            |            | q-value      |
|--------------------------|--------------------------|------------|------------|------------|------------|------------|------------|--------------|
|                          |                          | # Clusters | Mean score | Score std. | # Clusters | Mean score | Score std. |              |
| <i>C. glabrata</i>       | <i>E. gossypii</i>       | 110        | 0.923127   | 0.166954   | 135        | 0.781223   | 0.185239   | 1.246377e-14 |
| <i>C. glabrata</i>       | <i>K. lactis</i>         | 130        | 0.735160   | 0.271611   | 182        | 0.750885   | 0.219614   | 2.540659e+00 |
| <i>C. glabrata</i>       | <i>L. kluyveri</i>       | 133        | 0.914146   | 0.148330   | 180        | 0.698997   | 0.224363   | 6.520996e-30 |
| <i>C. glabrata</i>       | <i>L. thermotolerans</i> | 158        | 0.799953   | 0.340221   | 175        | 0.711038   | 0.229115   | 3.564941e-21 |
| <i>C. glabrata</i>       | <i>L. waltii</i>         | 80         | 0.907625   | 0.159899   | 149        | 0.617764   | 0.171961   | 2.548147e-28 |
| <i>C. glabrata</i>       | <i>S. cerevisiae</i>     | 211        | 0.902394   | 0.215193   | 233        | 0.761431   | 0.254924   | 1.469852e-26 |
| <i>C. glabrata</i>       | <i>Z. rouxii</i>         | 106        | 0.848399   | 0.264894   | 176        | 0.739260   | 0.213115   | 9.938580e-16 |
| <i>E. gossypii</i>       | <i>K. lactis</i>         | 162        | 0.913077   | 0.137812   | 139        | 0.937993   | 0.107177   | 6.098682e+00 |
| <i>E. gossypii</i>       | <i>L. kluyveri</i>       | 128        | 0.890786   | 0.180468   | 104        | 0.936843   | 0.073490   | 1.884650e+01 |
| <i>E. gossypii</i>       | <i>L. thermotolerans</i> | 145        | 0.883277   | 0.211791   | 117        | 0.906331   | 0.126042   | 1.400519e+01 |
| <i>E. gossypii</i>       | <i>L. waltii</i>         | 136        | 0.875535   | 0.188300   | 26         | 0.666164   | 0.092586   | 1.907556e-11 |
| <i>E. gossypii</i>       | <i>S. cerevisiae</i>     | 137        | 0.930417   | 0.130435   | 4          | 0.750408   | 0.116641   | 1.179527e-01 |
| <i>E. gossypii</i>       | <i>Z. rouxii</i>         | 141        | 0.912207   | 0.169651   | 135        | 0.927892   | 0.098276   | 1.392342e+00 |
| <i>K. lactis</i>         | <i>L. kluyveri</i>       | 150        | 0.873408   | 0.196178   | 118        | 0.904400   | 0.166237   | 5.194397e+00 |
| <i>K. lactis</i>         | <i>L. thermotolerans</i> | 170        | 0.835376   | 0.287032   | 311        | 0.911257   | 0.148861   | 4.837099e+00 |
| <i>K. lactis</i>         | <i>L. waltii</i>         | 156        | 0.894872   | 0.174856   | 322        | 0.659217   | 0.157747   | 4.116991e-54 |
| <i>K. lactis</i>         | <i>S. cerevisiae</i>     | 140        | 0.926267   | 0.137344   | 558        | 0.604940   | 0.304815   | 8.874461e-52 |
| <i>K. lactis</i>         | <i>Z. rouxii</i>         | 165        | 0.890555   | 0.206644   | 363        | 0.907668   | 0.161675   | 2.624822e+01 |
| <i>L. kluyveri</i>       | <i>L. thermotolerans</i> | 74         | 0.659957   | 0.365502   | 88         | 0.890102   | 0.169950   | 2.366942e-03 |
| <i>L. kluyveri</i>       | <i>L. waltii</i>         | 80         | 0.811876   | 0.236020   | 123        | 0.619473   | 0.144880   | 2.181274e-23 |
| <i>L. kluyveri</i>       | <i>S. cerevisiae</i>     | 130        | 0.899256   | 0.183383   | 322        | 0.486799   | 0.312124   | 9.865438e-51 |
| <i>L. kluyveri</i>       | <i>Z. rouxii</i>         | 111        | 0.831319   | 0.221694   | 203        | 0.887558   | 0.171537   | 5.585031e+00 |
| <i>L. thermotolerans</i> | <i>L. waltii</i>         | 40         | 0.437323   | 0.352406   | 50         | 0.565737   | 0.214099   | 1.654537e-02 |
| <i>L. thermotolerans</i> | <i>S. cerevisiae</i>     | 157        | 0.835134   | 0.301288   | 395        | 0.517876   | 0.317562   | 3.904145e-50 |
| <i>L. thermotolerans</i> | <i>Z. rouxii</i>         | 133        | 0.752922   | 0.337711   | 236        | 0.893811   | 0.151223   | 8.469869e-02 |
| <i>L. waltii</i>         | <i>S. cerevisiae</i>     | 103        | 0.903161   | 0.149766   | 417        | 0.408249   | 0.229220   | 2.210527e-56 |
| <i>L. waltii</i>         | <i>Z. rouxii</i>         | 126        | 0.805062   | 0.282641   | 258        | 0.658332   | 0.142452   | 1.721120e-34 |
| <i>S. cerevisiae</i>     | <i>Z. rouxii</i>         | 156        | 0.873448   | 0.248383   | 477        | 0.554868   | 0.312281   | 3.884058e-55 |

**Table ST-8.** The number of clusters found, the mean and standard deviation of the relaxed score for the clusters found by Proteny and i-ADHoRe. We also report the corrected p-value (q-value) of the kolmogorov-smirnov test between the two epirical distributions of scores. Experiments in which there is no statistically significant difference between the score distributions of Proteny and i-ADHoRe are highlighted in red.

| Genome A                 | Genome B                 | Proteny |      | i-ADHoRe |      |
|--------------------------|--------------------------|---------|------|----------|------|
|                          |                          | A       | B    | A        | B    |
| <i>C. glabrata</i>       | <i>E. gossypii</i>       | 2136    | 2506 | 1425     | 2862 |
| <i>C. glabrata</i>       | <i>K. lactis</i>         | 3174    | 3116 | 1834     | 5106 |
| <i>C. glabrata</i>       | <i>L. kluyveri</i>       | 3282    | 3445 | 5300     | 2762 |
| <i>C. glabrata</i>       | <i>L. thermotolerans</i> | 3033    | 3059 | 5137     | 2401 |
| <i>C. glabrata</i>       | <i>L. waltii</i>         | 1219    | 1307 | 2816     | 2110 |
| <i>C. glabrata</i>       | <i>S. cerevisiae</i>     | 3486    | 3502 | 4991     | 5773 |
| <i>C. glabrata</i>       | <i>Z. rouxii</i>         | 2236    | 2362 | 2109     | 5228 |
| <i>E. gossypii</i>       | <i>K. lactis</i>         | 4023    | 4196 | 1503     | 1462 |
| <i>E. gossypii</i>       | <i>L. kluyveri</i>       | 4582    | 5054 | 1790     | 1960 |
| <i>E. gossypii</i>       | <i>L. thermotolerans</i> | 4407    | 4414 | 1983     | 2111 |
| <i>E. gossypii</i>       | <i>L. waltii</i>         | 4358    | 5153 | 278      | 551  |
| <i>E. gossypii</i>       | <i>S. cerevisiae</i>     | 2953    | 3028 | 39       | 28   |
| <i>E. gossypii</i>       | <i>Z. rouxii</i>         | 3969    | 4226 | 1939     | 2010 |
| <i>K. lactis</i>         | <i>L. kluyveri</i>       | 4851    | 4888 | 2457     | 2155 |
| <i>K. lactis</i>         | <i>L. thermotolerans</i> | 4523    | 4367 | 4770     | 4720 |
| <i>K. lactis</i>         | <i>L. waltii</i>         | 4590    | 5357 | 4563     | 8624 |
| <i>K. lactis</i>         | <i>S. cerevisiae</i>     | 3056    | 3100 | 4518     | 6972 |
| <i>K. lactis</i>         | <i>Z. rouxii</i>         | 4091    | 4217 | 4548     | 4384 |
| <i>L. kluyveri</i>       | <i>L. thermotolerans</i> | 5289    | 5153 | 5172     | 5504 |
| <i>L. kluyveri</i>       | <i>L. waltii</i>         | 5222    | 5848 | 9870     | 5394 |
| <i>L. kluyveri</i>       | <i>S. cerevisiae</i>     | 4545    | 4669 | 6961     | 5382 |
| <i>L. kluyveri</i>       | <i>Z. rouxii</i>         | 5139    | 4981 | 5272     | 5518 |
| <i>L. thermotolerans</i> | <i>L. waltii</i>         | 5190    | 6064 | 10,597   | 5271 |
| <i>L. thermotolerans</i> | <i>S. cerevisiae</i>     | 4080    | 4336 | 6961     | 4941 |
| <i>L. thermotolerans</i> | <i>Z. rouxii</i>         | 4825    | 4766 | 4838     | 4908 |
| <i>L. waltii</i>         | <i>S. cerevisiae</i>     | 2890    | 2701 | 8834     | 6942 |
| <i>L. waltii</i>         | <i>Z. rouxii</i>         | 5538    | 4870 | 4603     | 8681 |
| <i>S. cerevisiae</i>     | <i>Z. rouxii</i>         | 4171    | 4053 | 5018     | 6971 |

Table ST-9. The number of genes found by Proteny and i-ADHoRe for each experiment.
